# Supplementary material for: Calcium transfer from the ER to other organelles for optimal signaling in Toxoplasma gondii
Source: eLife. 2025 Nov 12;13:RP101894. doi: 10.7554/eLife.101894 (PMC12611264; doi:10.7554/eLife.101894)
Supplement: Figure 1—source data 1. [file elife-101894-fig1-data1.xlsx]

## Sheet: Figure 1B
		1 uM-TG	2uM TG
	0	38.309	41.77
	1.6	38.375	41.896				1 uM-TG				2 uM TG
	3.2	37.948	41.663				100	100	100		153.105	137.55	216.006
	4.8	37.613	40.676
	6.4	37.59	40.202
	8	37.89	39.9035
	9.6	37.768	40.245
	11.2	37.912	40.1865
	12.8	37.832	40.552
	14.4	38.017	40.596
	16	38.317	40.381
	17.6	38.592	40.5155
	19.2	38.554	40.7015
	20.8	39.059	40.2705
	22.4	39.324	40.397
	24	39.207	39.541
	25.6	38.816	39.3265
	27.2	39.044	40.286
	28.8	39.105	40.995
	30.4	39.448	41.047
	32	39.114	40.9345
	33.6	38.541	40.195
	35.2	37.977	40.267
	36.8	38.447	40.8575
	38.4	38.36	41.344
	40	38.45	41.3305
	41.6	38.514	41.202
	43.2	38.745	41.309
	44.8	39.162	41.5415
	46.4	39.483	41.6595
	48	39.185	41.8395
	49.6	39.421	41.7115
	51.2	39.614	41.671
	52.8	39.286	41.562
	54.4	39.363	41.5515
	56	38.86	41.3205
	57.6	39.037	40.9645
	59.2	39.184	40.8735
	60.8	39.023	41.3695
	62.4	38.647	41.802
	64	38.967	42.014
	65.6	39.009	41.907
	67.2	38.993	41.256
	68.8	38.618	40.342
	70.4	38.801	40.341
	72	39.109	40.798
	73.6	39.715	40.505
	75.2	39.795	40.406
	76.8	39.483	39.9665
	78.4	39.499	39.3735
	80	39.857	40.2515
	81.6	39.494	41.2105
	83.2	39.39	41.9145
	84.8	38.836	42.914
	86.4	38.694	43.34
	88	38.893	43.866
	89.6	38.938	43.5895
	91.2	38.458	41.642
	92.8	38.638	40.462
	94.4	38.666	40.5515
	96	39.28	41.28
	97.6	40.156	42.769
	99.2	41.603	45.09
	100.8	43.112	46.3275
	102.4	44.795	47.953
	104	46.437	49.8055
	105.6	48.342	51.573
	107.2	49.943	54.107
	108.8	52.548	58.4605
	110.4	54.585	64.8175
	112	56.994	71.377
	113.6	59.142	76.584
	115.2	61.268	80.848
	116.8	63.476	86.592
	118.4	66.619	92.008
	120	69.489	99.8815
	121.6	72.797	106.172
	123.2	74.956	111.844
	124.8	77.401	117.044
	126.4	79.49	122.933
	128	82.131	126.853
	129.6	84.486	133.183
	131.2	86.953	139.198
	132.8	88.789	146.758
	134.4	92.426	151.319
	136	95.621	153.054
	137.6	98.881	154.482
	139.2	101.061	158.938
	140.8	103.03	164.332
	142.4	103.969	171.46
	144	105.275	175.201
	145.6	106.458	178.769
	147.2	108.709	184.244
	148.8	111.791	187.387
	150.4	115.195	191.505
	152	116.729	194.359
	153.6	118.105	197.786
	155.2	118.957	198.46
	156.8	120.065	200.548
	158.4	121.397	201.612
	160	123.714	204.805
	161.6	124.068	209.057
	163.2	124.144	213.461
	164.8	123.377	214.101
	166.4	121.765	215.173
	168	122.139	216.243
	169.6	126.032	216.263
	171.2	129.016	214.014
	172.8	130.835	215.482
	174.4	133.687	216.404
	176	133.118	222.531
	177.6	132.417	226.387
	179.2	132.061	223.831
	180.8	132.159	219.036
	182.4	133.315	218.702
	184	136.099	217.148
	185.6	136.774	220.575
	187.2	136.592	223.736
	188.8	135.892	221.569
	190.4	136.508	214.082
	192	137.789	212.632
	193.6	139.655	212.443
	195.2	140.578	217.318
	196.8	141.436	223.958
	198.4	141.179	225.041
	200	139.778	220.243
	201.6	138.945	220.685
	203.2	139.473	218.606
	204.8	141.69	218.726
	206.4	143.92	217.643
	208	144.52	212.611
	209.6	143.936	207.067
	211.2	142.308	205.405
	212.8	141.162	206.995
	214.4	141.893	210.047
	216	143.286	214.107
	217.6	144.09	213.593
	219.2	144.958	210.566
	220.8	144.745	209.002
	222.4	143.306	207.798
	224	141.63	206.486
	225.6	139.993	207.053
	227.2	136.233	208.247
	228.8	134.117	209.877
	230.4	134.052	210.698
	232	136.252	200.96
	233.6	139.944	200.122
	235.2	142.426	200.102
	236.8	140.769	201.101
	238.4	139.546	202.41
	240	138.324	203.512
	241.6	137.887	197.035
	243.2	137.457	199.097
	244.8	138.369	198.408
	246.4	138.227	195.191
	248	139.347	193.613
	249.6	138.214	194.569
	251.2	134.7	194.809
	252.8	132.003	195.498
	254.4	131.138	194.1
	256	132.115	187.731
	257.6	135.413	184.519
	259.2	137.453	183.417
	260.8	134.939	183.222
	262.4	130.597	184.027
	264	126.592	184.093
	265.6	126.044	181.661
	267.2	128.766	179.745
	268.8	132.992	178.402
	270.4	135.275	178.888
	272	134.75	178.077
	273.6	132.401	178.679
	275.2	129.528	179.036
	276.8	127.767	177.538
	278.4	127.462	173.331
	280	127.153	172.698
	281.6	127.39	170.922
	283.2	127.029	169.107
	284.8	125.593	176.998
	286.4	127.273	180
	288	128.12	175.965
	289.6	126.676	173.24
	291.2	123.47	167.873
	292.8	118.898	161.852
	294.4	116.46	162.93
	296	119.167	160.169
	297.6	122.147	157.912
	299.2	124.848	155.911
	300.8	125.14	155.662
	302.4	123.914	155.638
	304	122.172	153.493
	305.6	121.671	151.451
	307.2	120.753	151.066
	308.8	119.516	147.497
	310.4	118.651	147.064
	312	118.74	146.718
	313.6	115.416	146.924
	315.2	112.983	148.826
	316.8	112.16	150.16
	318.4	111.977	144.895
	320	111.836	140.044
	321.6	112.537	136.48
	323.2	111.582	136.529
	324.8	112.033	139.071
	326.4	114.162	141.757
	328	114.168	141.629
	329.6	112.769	138.877
	331.2	110.939	135.102
	332.8	109.856	133.457
	334.4	110.746	132.922
	336	112.199	132.589
	337.6	112.657	132.656
	339.2	112.317	132.137
	340.8	111.154	131.597
	342.4	109.963	131.644
	344	110.395	132.577
	345.6	110.382	133.124
	347.2	110.43	132.555
	348.8	109.875	131.453
	350.4	109.231	130.711
	352	107.98	129.097
	353.6	106.219	127.344
	355.2	104.789	126.467
	356.8	105.261	126.146
	358.4	105.405	125.708
	360	105.522	125.499
	361.6	104.948	126.835
	363.2	103.422	123.689
	364.8	101.711	120.034
	366.4	101.785	117.168
	368	100.275	115.234
	369.6	97.755	117.486
	371.2	96.036	121.331
	372.8	97.071	123.369
	374.4	98.279	124.312
	376	100.009	121.276
	377.6	100.264	116.274
	379.2	98.543	114.882
	380.8	97.064	113.391
	382.4	97.885	116.862
	384	97.406
	385.6	97.399
	387.2	97.011
	388.8	96.724
	390.4	97.19
	392	98.541
	393.6
	395.2
	396.8
	398.4
	400
	401.6
	403.2
	404.8
	406.4
	408
	409.6
	411.2
	412.8
	414.4
	416
	417.6
	419.2
	420.8
	422.4
	424
	425.6
	427.2
	428.8
	430.4
	432
	433.6
	435.2
	436.8
	438.4
	440
	441.6
	443.2
	444.8
	446.4
	448
	449.6
	451.2
	452.8
	454.4
	456
	457.6
	459.2
	460.8
	462.4
	464
	465.6
	467.2
	468.8
	470.4
	472
	473.6
	475.2
	476.8
	478.4
	480
	481.6
	483.2
	484.8
	486.4
	488
	489.6
	491.2
	492.8
	494.4
	496
	497.6
	499.2
	500.8
	502.4
	504
	505.6
	507.2
	508.8
	510.4
	512
	513.6
	515.2
	516.8
	518.4
	520
	521.6
	523.2
	524.8
	526.4
	528
	529.6
	531.2
	532.8
	534.4
	536
	537.6
	539.2
	540.8
	542.4
	544
	545.6
	547.2
	548.8
	550.4
	552
	553.6
	555.2
	556.8
	558.4
	560
	561.6
	563.2
	564.8
	566.4
	568
	569.6
	571.2
	572.8
	574.4
	576
	577.6
	579.2
	580.8
	582.4
	584
	585.6
	587.2
	588.8
	590.4
	592
	593.6
	595.2
	596.8
	598.4
	600
	601.6
	603.2
	604.8
	606.4
	608
	609.6
	611.2
	612.8
	614.4
	616
	617.6
	619.2
	620.8
	622.4
	624
	625.6
	627.2
	628.8
	630.4
	632
	633.6
	635.2
	636.8
	638.4
	640
	641.6
	643.2
	644.8
	646.4
	648
	649.6
	651.2
	652.8
	654.4
	656
	657.6
	659.2
	660.8
	662.4
	664
	665.6
	667.2
	668.8
	670.4
	672
	673.6
	675.2
	676.8
	678.4
	680
	681.6
	683.2
	684.8
	686.4
	688
	689.6
	691.2
	692.8
	694.4
	696
	697.6
	699.2
	700.8
	702.4
	704
	705.6
	707.2
	708.8
	710.4
	712
	713.6
	715.2
	716.8
	718.4
	720
	721.6
	723.2
	724.8
	726.4
	728
	729.6
	731.2
	732.8
	734.4
	736
	737.6
	739.2
	740.8
	742.4
	744
	745.6
	747.2
	748.8
	750.4
	752
	753.6
	755.2
	756.8
	758.4
	760
	761.6
	763.2
	764.8
	766.4
	768
	769.6
	771.2
	772.8
	774.4
	776
	777.6
	779.2
	780.8
	782.4
	784
	785.6
	787.2
	788.8
	790.4
	792
	793.6
	795.2
	796.8
	798.4
	800
	801.6
	803.2
	804.8
	806.4
	808
	809.6
	811.2
	812.8
	814.4
	816
	817.6
	819.2
	820.8
	822.4
	824
	825.6

## Sheet: Figure 1C
Time(s)	TG-IO	IO-TG
0	67.676	112.652					T1	T2
1.4	67.89	114.749					248.661	33.4916
2.8	66.653	117.97					294.7	1.40589
4.2	67.639	118.175					180.256	21.8539
5.6	68.463	113.11					183.734	67.9492
7	66.8	117.008					253.764	45.1249
8.4	66.901	115.023					137.514	0.826773
9.8	68.067	114.74					306.257
11.2	66.543	104.853
12.6	70.041	119.376
14	65.821	112.108
15.4	66.696	117.304
16.8	66.385	112.558
18.2	67.813	117.314
19.6	65.976	113.261
21	67.726	121.16
22.4	67.333	121.606
23.8	69.049	111.456
25.2	67.488	109.909
26.6	66.889	115.473
28	68.99	121.649
29.4	70.33	110.423
30.8	67.38	124.698
32.2	67.436	113.104
33.6	69.11	116.058
35	69.272	115.371
36.4	68.74	116.031
37.8	68.045	122.233
39.2	66.585	113.736
40.6	67.71	122.937
42	67.954	114.458
43.4	70.997	113.815
44.8	69.706	115.895
46.2	70.552	121.682
47.6	69.011	114.286
49	67.799	119.74
50.4	67.676	114.751
51.8	69.63	124.145
53.2	69.471	117.789
54.6	68.792	121.171
56	67.43	117.257
57.4	67.892	114.652
58.8	69.314	118.033
60.2	68.538	119.77
61.6	68.858	126.028
63	69.63	123.254
64.4	70.116	119.237
65.8	70.708	122.727
67.2	70.961	119.39
68.6	70.383	123.269
70	68.177	117.648
71.4	66.163	114.744
72.8	69.736	120.65
74.2	71.137	116.579
75.6	75.322	119.158
77	69.984	121.09
78.4	70.631	118.522
79.8	70.601	125.323
81.2	69.237	121.43
82.6	69.158	117.251
84	71.266	116.883
85.4	70.868	121.743
86.8	69.755	116.344
88.2	70.281	119.239
89.6	68.814	111.827
91	71.481	120.041
92.4	67.568	119.594
93.8	73.139	123.182
95.2	69.919	124.383
96.6	72.447	125.275
98	70.759	127.32
99.4	70.065	121.299
100.8	72.221	117.737
102.2	69.782	287.416
103.6	74.419	386.007
105	71.984	603.78
106.4	71.665	707.798
107.8	64.714	757.128
109.2	71.359	851.823
110.6	65.602	800.294
112	68.744	788.644
113.4	73.371	846.49
114.8	73.78	820.083
116.2	77.569	904.541
117.6	81.49	758.613
119	94.397	767.378
120.4	101.351	761.146
121.8	106.364	773.446
123.2	111.993	749.81
124.6	124.837	804.867
126	133.52	821.092
127.4	145.657	753.796
128.8	151.681	766.309
130.2	159.109	799.602
131.6	169.626	717.697
133	182.95	808.399
134.4	190.679	816.06
135.8	192.069	805.248
137.2	211.869	728.121
138.6	212.678	819.574
140	210.371	776.509
141.4	213.552	699.254
142.8	229.118	763.599
144.2	220.863	899.045
145.6	248.356	747.691
147	253.045	801.005
148.4	263.159	742.714
149.8	261.585	780.885
151.2	258.677	761.4
152.6	291.31	848.156
154	279.226	734.25
155.4	291.723	589.948
156.8	294.89	793.33
158.2	302.67	789.976
159.6	323.135	859.679
161	319.054	709.827
162.4	306.143	862.276
163.8	308.194	813.704
165.2	321.593	808.753
166.6	319.566	772.433
168	314.405	724.977
169.4	316.294	717.252
170.8	321.012	772.93
172.2	311.412	738.624
173.6	349.985	704.822
175	317.614	729.044
176.4	317.308	849.96
177.8	337.264	729.496
179.2	329.309	806.903
180.6	331.371	850.616
182	305.325	693.271
183.4	325.067	695.8
184.8	338.511	770.748
186.2	339.235	683.53
187.6	339.791	709.753
189	332.256	734.331
190.4	340.938	649.298
191.8	340.249	636.872
193.2	330.567	705.171
194.6	305.123	761.755
196	316.478	719.145
197.4	314.705	753.284
198.8	310.88	653.611
200.2	331.317	850.424
201.6	333.905	639.047
203	331.806	684.971
204.4	295.639	844.292
205.8	318.184	634.531
207.2	298.138	777.272
208.6	313.014	743.661
210	301.448	794.668
211.4	324.235	770.438
212.8	296.502	680.792
214.2	319.452	721.061
215.6	288.964	652.986
217	313.603	720.418
218.4	283.161	896.169
219.8	299.511	806.242
221.2	297.478	714.633
222.6	311.635	620.189
224	292.87	672.292
225.4	299.219	746.093
226.8	281.842	636.592
228.2	297.754	799.55
229.6	279.138	743.759
231	285.065	749.752
232.4	282.612	675.375
233.8	297.352	698.551
235.2	269.706	679.268
236.6	265.811	642.458
238	283.775	712.807
239.4	277.354	643.887
240.8	265.637	673.817
242.2	268.876	651.392
243.6	264.932	720.385
245	275.897	723.598
246.4	274.507	729.074
247.8	277.986	717.476
249.2	258.119	659.811
250.6	261.26	744.089
252	272.743	637.633
253.4	266.05	772.941
254.8	264.149	716.108
256.2	277.011	752.008
257.6	260.813	657.897
259	248.268	583.717
260.4	257.488	699.415
261.8	252.721	680.375
263.2	257.032	697.388
264.6	256.161	610.707
266	247.56	751.934
267.4	241.054	732.924
268.8	253.201	687.628
270.2	240.174	713.385
271.6	245.559	701.825
273	246.24	720.953
274.4	255.313	635.928
275.8	259.449	673.45
277.2	237.816	591.413
278.6	250.246	671.448
280	244.442	611.965
281.4	248.214	598.567
282.8	238.306	714.21
284.2	238.884	645.403
285.6	244.823	583.716
287	249.196	645.541
288.4	243.529	760.757
289.8	225.89	688.294
291.2	240.057	691.314
292.6	230.339	709.634
294	237.728	754.128
295.4	239.692	649.498
296.8	239.451	688.381
298.2	248.569	597.393
299.6	232.193	789.633
301	227.992	772.826
302.4	233.763	705.017
303.8	233.835	690.017
305.2	227.221	634.593
306.6	227.614	651.73
308	241.694	629.504
309.4	230.981	617.903
310.8	229.829	675.42
312.2	237.98	657.001
313.6	214.055	670.607
315	226.868	701.627
316.4	235.194	806.121
317.8	223.05	680.154
319.2	230.075	640.978
320.6	217.874	715.983
322	232.768	693.769
323.4	209.465	720.187
324.8	228.54	678.987
326.2	231.46	659.332
327.6	227.568	639.711
329	221.791	672.435
330.4	218.465	646.285
331.8	219.609	717.8
333.2	223.015	677.122
334.6	225.436	613.519
336	222.86	706.392
337.4	204.998	695.574
338.8	234.439	741.227
340.2	225.275	685.463
341.6	236.033	624.296
343	229.113	586.206
344.4	211.517	604.935
345.8	221.055	713.246
347.2	217.944	658.716
348.6	205.943	658.605
350	214.186	712.079
351.4	224.437	606.223
352.8	203.795	628.284
354.2	227.973	666.177
355.6	212.497	641.247
357	213.426	716.154
358.4	214.845	630.668
359.8	206.706	623.095
361.2	219.53	655.246
362.6	210.886	659.82
364	200.664	656.52
365.4	199.317	620.306
366.8	201.815	640.855
368.2	208.719	743.359
369.6	210.19	647.148
371	219.337	604.572
372.4	214.215	606.758
373.8	217.921	752.25
375.2	204.624	677.143
376.6	208.331	670.438
378	192.782	692.713
379.4	218.426	663.902
380.8	209.662	738.595
382.2	210.82	642.086
383.6	209.296	575.446
385	197.802	706.093
386.4	212.533	683.642
387.8	206.916	629.102
389.2	196.455	661.298
390.6	213.752	601.001
392	202.057	592.269
393.4	204.457	595.214
394.8	219.905	643.943
396.2	204.973	661.132
397.6	206.964	692.35
399	208.149	624.312
400.4	201.632	611.635
401.8	196.745	606.285
403.2	208.212	283.682*
404.6	203.503	621.228
406	166.118	578.892
407.4	341.856	592.903
408.8	441.052	661.577
410.2	538.466	579.841
411.6	556.172	570.809
413	675.066	541.845
414.4	744.352	521.304
415.8	731.996	633.562
417.2	644.766	654.574
418.6	671.587	560.855
420	675.854	608.276
421.4	779.265	573.557
422.8	722.734	581.924
424.2	733.383	599.501
425.6	783.553	593.227
427	740.153	595.724
428.4	717.82	536.854
429.8	790.424	599.357
431.2	697.903	613.262
432.6	757.058	587.455
434	768.705	558.861
435.4	790.67	656.148
436.8	737.95	580.008
438.2	746.877	583.902
439.6	675.248	599.523
441	712.561	600.83
442.4	658.245	514.557
443.8	706.745	659.631
445.2	788.432	605.207
446.6	767.349	639.626
448	637.612	577.144
449.4	689.599	597.795
450.8	712.47	560.466
452.2	653.269	513.388
453.6	730.838	641.795
455	684.362	630.962
456.4	750.506	624.561
457.8	672.167	628.9
459.2	768.169	598.391
460.6	682.187	577.635
462	736.283	551.556
463.4	673.929	613.515
464.8	679.561	587.83
466.2	678.998	566.367
467.6	673.976	550.114
469	670.488	556.523
470.4	667.994	584.161
471.8	738.176	565.44
473.2	694.317	669.409
474.6	683.62	584.111
476	705.594	556.095
477.4	607.606	675.445
478.8	696.061	529.744
480.2	725.462	672.169
481.6	690.592	546.819
483	680.264	541.337
484.4	679.554	618.983
485.8	673.2	667.189
487.2	691.052	663.156
488.6	707.181	577.16
490	682.324	613.002
491.4	678.385	613.915
492.8	746.407	595.676
494.2	646.719	529.462
495.6	655.733	645.604
497	690.196	627.666
498.4	699.91	584.558
499.8	729.922	566.623
501.2	663.971	632.581
502.6	691.766	544.932
504	689.352	543.908
505.4	637.951	555.974
506.8	723.52	555.604
508.2	656.63	554.367
509.6	618.525	598.841
511	629.121	595.505
512.4	661.159	587.43
513.8	665.908	619.288
515.2	704.058	551.304
516.6	611.002	579.815
518	730.33	586.843
519.4	663.135	579.053
520.8	665.088	581.728
522.2	682.53	560.669
523.6	626.18	528.446
525	634.983	720.921
526.4	659.049	558.908
527.8	655.259	559.858
529.2	637.637	600.13
530.6	612.535	579.712
532	690.011	519.656
533.4	681.498	617.708
534.8	649.415	597.285
536.2	642.041	550.774
537.6	653.586	583.355
539	657.434	591.234
540.4	655.811	569.794
541.8	662.805	550.307
543.2	664.465	605.372
544.6	564.42	564.32
546	656.785	630.911
547.4	656.052	607.736
548.8	666.815	542.957
550.2	667.361	581.435
551.6	662.596	580.309
553	698.438	527.074
554.4	634.968	575.811
555.8	618.344	541.339
557.2	653.619	579.899
558.6	666.477	568.014
560	552.126	547.125
561.4	618.947	549.012
562.8	653.67	578.489
564.2	593.635	588.213
565.6	593.24	560.112
567	601.501	528.463
568.4	592.763	542.483
569.8	657.791	588.271
571.2	609.1	569.355
572.6	545.508	504.231
574	629.719	485.998
575.4	631.23	568.428
576.8	650.808	552.943
578.2	572.022	562.043
579.6	627.243	535.361
581	631.109	568.221
582.4	595.284	547.139
583.8	627.1	548.02
585.2	576.039	563.294
586.6	638.132	614.37
588	577.185	490.755
589.4	581.281	551.48
590.8	582.02	563.301
592.2	657.234	543.386
593.6	521.528	528.616
595	561.037	565.173
596.4	632.834	567.812
597.8	639.185	478.678
599.2	623.396	508.66
600.6	698.001	616.658
602	581.092	590.992
603.4	549.604	589.665
604.8	613.236	532.304
606.2	257.749	496.802
607.6	575.175	234.747
609	479.591	510.326
610.4	544.761	468.241
611.8	635.708	458.394
613.2	608.516	502.005
614.6	539.809	502.913
616	546.336	466.882
617.4	545.259	473.486
618.8	547.555	514.388
620.2	532.238	438.468
621.6	485.7	461.902
623	639.845	502.998
624.4	532.876	447.272
625.8	545.066	461.35
627.2	520.582	457.747
628.6	582.124	462.614
630	578.091	462.478
631.4	499.523	499.078
632.8	539.417	466.004
634.2	539.927	427.05
635.6	553.896	424.577
637	477.936	447.877
638.4	492.727	486.419
639.8	573.012	465.948
641.2	494.534	458.878
642.6	611.079	454.533
644	572.901	507.076
645.4	587.307	504.006
646.8	536.311	453.044
648.2	568.684	474.908
649.6	552.082	448.794
651	591.867	507.389
652.4	583.071	466.499
653.8	545.673	503.619
655.2	574.814	448.906
656.6	491.938	512.257
658	564.981	496.44
659.4	510.834	490.049
660.8	509.757	430.615
662.2	643.439	481.605
663.6	543.654	508.797
665	572.466	542.625
666.4	530.921	454.658
667.8	548.76	492.209
669.2	554.538	462.683
670.6	564.128	481.955
672	538.48	508.325
673.4	563.923	498.922
674.8	589.661	482.542
676.2	524.085	542.43
677.6	538.344	514.189
679	604.418	515.807
680.4	542.984	499.054
681.8	579.339	491.056
683.2	575.138	500.698
684.6	559.242	510.717
686	555.62	484.876
687.4	521.335	503.252
688.8	575.869	484.14
690.2	598.348	495.279
691.6	606.622	519.343
693	622.666	542.336
694.4	536.973	556.878
695.8	606.236	508.99
697.2	554.334	561.926
698.6	556.912	490.556
700	549.874	544.941
701.4	601.848	543.724
702.8	588.646	497.627
704.2	535.291	540.143
705.6	613.514	510.24
707	609.143	501.324
708.4	564.892	518.266
709.8	624.667	461.671
711.2	648.807	555.028
712.6	561.702	532.961
714	617.422	610.595
715.4	604.791	587.307
716.8	651.118	499.322
718.2	610.422	533.436
719.6	644.354	526.741
721	632.087	484.955
722.4	594.786	562.788
723.8	621.459	566.113
725.2	523.889	509.037
726.6	605.64	586.407
728	602.678	540.807
729.4	600.787	530.457
730.8	567.335	509.869
732.2	586.177	566.519
733.6	632.879	562.998
735	569.757	542.205
736.4	614.065	528.468
737.8	645.486	537.64
739.2	587.459	577.171
740.6	624.918	599.959
742	657.947	558.797
743.4	630.777	601.732
744.8	573.744	548.686
746.2	653.493	572.549
747.6	633.805	567.679
749	607.16	611.978
750.4	606.177	610.028
751.8	624.109	621.527
753.2	646.794	520.785
754.6	577.44	546.432
756	591.959	648.337
757.4	644.507	601.472
758.8	570.024	542.829
760.2	658.176	575.962
761.6	621.633	575.671
763	593.508	558.24
764.4	684.378	562.997
765.8	626.711	670.702
767.2	623.36	634.38
768.6	627.244	613.116
770	661.943	627.71
771.4	713.309	548.253
772.8	605.002	624.882
774.2	598.134	644.174
775.6	646.464	619.933
777	634.933	627.618
778.4	598.465	577.335
779.8	669.819	613.414
781.2	642.513	650.319
782.6	662.145	721.514
784	648.38	627.317
785.4	627.376	666.769
786.8	618.368	583.463
788.2	641.918	639.873
789.6	692.895	587.459
791	614.517	620.974
792.4	626.657	634.305
793.8	658.949	571.932
795.2	611.211	663.164
796.6	669.177	601.655
798	655.889	690.894
799.4	727.943	615.703
800.8	653.941	564.7
802.2	617.245	654.799
803.6	611.139	718.722
805	682.016	664.295
806.4	618.715	668.804
807.8	662.622	687.264
809.2	738.833	603.159
810.6	643.951	666.537
812	681.138	706.593
813.4	678.414	618.487
814.8	728.342	674.442
816.2	647.561	653.607
817.6	645.399	703.013
819	670.456	677.771
820.4	658.836	670.824
821.8	647.959	712.99
823.2	671.801	611.604
824.6	660.971	712.514
826	750.093	663.618
827.4	714.233	668.574
828.8	635.543	679.956
830.2	683.74	626.516
831.6	695.46	689.642
833	694.36	676.777
834.4	638.054	635.306
835.8	696.801	689.291
837.2	758.997	661.31
838.6	681.474	676.074
840	666.764	661.972
841.4	610.232	739.256
842.8	738	737.67
844.2	619.787	739.881
845.6	648.006	653.162
847	716.746	740.893
848.4	672.173	682.419
849.8	670.666	642.553
851.2	699.659	674.919
852.6	716.435	755.075
854	631.594	745.909
855.4	653.251	718.943
856.8	674.809	790.319
858.2	720.888	730.027
859.6	666.249	667.997
861	662.483	654.985
862.4	655.894	687.55
863.8	670.943	829.821
865.2	664.818	637.993
866.6	684.676	721.194
868	707.185	728.219
869.4	764.662	788.891
870.8	749.581	718.49
872.2	644.155	674.688
873.6	740.592	704.6
875	662.384	691.696
876.4	763.174	732.695
877.8	642.006	790.895
879.2	682.416	690.563
880.6	709.714	739.136
882	721.442	853.704
883.4	632.648	754.89
884.8	722.597	729.498
886.2	711.677	841.481
887.6	676.115	742.934
889	692.56	800.906
890.4	706.743	810.836
891.8	787.682	805.381
893.2	772.021	770.295
894.6	669.654	740.328
896	650.379	714.211
897.4	791.856	798.574
898.8	730.844	674.31

## Sheet: Figure 1D
		Ca- TG	TG
	0	34.964	40.276				-Ca				+ Ca
	1.6	34.941	38.605				100	100	100		251.401	236.054	164.928
	3.2	34.555	37.335
	4.8	33.685	37.968
	6.4	33.104	38.296
	8	33.977	38.882
	9.6	34.439	38.649
	11.2	34.892	38.265
	12.8	35.057	38.481
	14.4	35.082	39.326
	16	35.385	39.349
	17.6	36.023	39.715
	19.2	36.312	39.765
	20.8	35.863	39.81
	22.4	35.984	39.399
	24	36.355	39.747
	25.6	36.697	39.951
	27.2	36.678	40.285
	28.8	36.607	40.608
	30.4	36.345	41.189
	32	36.025	40.776
	33.6	36.043	41.028
	35.2	36.597	41.235
	36.8	37.042	41.792
	38.4	37.135	42.565
	40	37.327	43.246
	41.6	36.898	42.888
	43.2	36.633	41.936
	44.8	36.985	41.27
	46.4	37.588	41.073
	48	38.128	41.727
	49.6	38.292	42.82
	51.2	37.843	43.482
	52.8	37.536	43.564
	54.4	37.826	43.52
	56	37.596	43.493
	57.6	37.562	43.654
	59.2	37.456	44.203
	60.8	37.777	44.058
	62.4	38.37	43.877
	64	39.03	43.342
	65.6	38.771	43.207
	67.2	38.488	42.983
	68.8	37.618	43.47
	70.4	37.711	43.735
	72	38.033	44.332
	73.6	37.987	44.845
	75.2	38.186	45.18
	76.8	38.351	45.163
	78.4	38.281	45.568
	80	38.847	45.587
	81.6	38.783	44.955
	83.2	38.932	44.078
	84.8	39.286	43.408
	86.4	39.513	43.709
	88	39.84	45.209
	89.6	39.992	46.353
	91.2	39.107	46.362
	92.8	38.783	45.987
	94.4	38.389	45.859
	96	38.147	46.55
	97.6	38.278	47.66
	99.2	38.719	48.265
	100.8	39.007	48.176
	102.4	39.189	47.521
	104	38.855	47.182
	105.6	38.658	46.835
	107.2	40.598	46.653
	108.8	45.145	47.137
	110.4	51.24	48.287
	112	56.629	49.16
	113.6	60.728	49.062
	115.2	63.186	48.76
	116.8	64.843	48.25
	118.4	66.252	48.587
	120	68.04	49.43
	121.6	69.42	49.681
	123.2	70.727	49.742
	124.8	71.994	49.633
	126.4	72.798	49.845
	128	72.995	50.386
	129.6	73.853	50.185
	131.2	74.521	50.019
	132.8	75.137	49.951
	134.4	75.43	49.417
	136	76.392	49.255
	137.6	77.039	49.922
	139.2	77.261	50.4
	140.8	77.76	51.281
	142.4	78.549	51.235
	144	79.064	51.435
	145.6	80.106	51.48
	147.2	79.833	51.812
	148.8	79.081	51.938
	150.4	78.934	51.979
	152	79.305	51.455
	153.6	79.718	51.826
	155.2	80.489	52.679
	156.8	80.903	52.52
	158.4	81.543	53.076
	160	81.762	53.504
	161.6	82.443	54.127
	163.2	82.353	54.223
	164.8	82.361	54.685
	166.4	82.408	54.282
	168	83.097	54.519
	169.6	83.195	53.837
	171.2	83.341	54.131
	172.8	82.533	53.154
	174.4	82.213	53.42
	176	82.587	54.096
	177.6	83.917	55.537
	179.2	84.672	55.959
	180.8	84.172	56.716
	182.4	83.143	56.422
	184	82.282	55.607
	185.6	83.241	54.671
	187.2	84.229	55.175
	188.8	84.842	55.083
	190.4	84.155	55.558
	192	83.35	55.994
	193.6	82.883	55.45
	195.2	83.505	55.534
	196.8	83.955	56.848
	198.4	84.521	57.113
	200	84.655	57.442
	201.6	84.083	57.772
	203.2	83.723	57.908
	204.8	84.171	58.511
	206.4	85.046	58.468
	208	85.451	58.261
	209.6	85.48	57.766
	211.2	84.876	58.638
	212.8	83.742	59.132
	214.4	83.807	59.085
	216	86.076	58.588
	217.6	86.309	58.468
	219.2	85.804	57.884
	220.8	85.427	57.806
	222.4	84.743	57.566
	224	85.481	57.639
	225.6	88.005	58.416
	227.2	87.31	59.043
	228.8	86.717	59.161
	230.4	86.063	58.906
	232	85.141	59.466
	233.6	85.215	60.703
	235.2	85.938	61.303
	236.8	86.306	61.212
	238.4	87.565	60.935
	240	88.291	59.713
	241.6	88.293	59.384
	243.2	88.348	59.526
	244.8	88.613	60.324
	246.4	88.585	61.273
	248	88.661	62.413
	249.6	89.127	61.751
	251.2	89.378	60.867
	252.8	89.071	60.371
	254.4	88.604	61.229
	256	88.199	61.743
	257.6	88.586	62.395
	259.2	89.39	62.715
	260.8	90.258	62.801
	262.4	89.396	62.08
	264	88.062	62.32
	265.6	87.43	62.117
	267.2	87.53	62.067
	268.8	88.455	62.765
	270.4	89.71	63.854
	272	89.672	63.065
	273.6	89.852	63.576
	275.2	89.808	63.377
	276.8	90.568	63.107
	278.4	91.562	63.066
	280	92.085	63.365
	281.6	91.215	63.094
	283.2	90.614	64.036
	284.8	90.245	64.417
	286.4	91.007	64.08
	288	91.429	64.387
	289.6	91.704	65.598
	291.2	91.257	66.193
	292.8	91.166	67.023
	294.4	92.043	66.373
	296	93.858	64.987
	297.6	94.137	64.698
	299.2	93.95	65.756
	300.8	93.244	66.73
	302.4	92.716	67.498
	304	92.391	67.365
	305.6	92.632	67.317
	307.2	92.174	66.901
	308.8	91.812	67.055
	310.4	92.449	67.84
	312	93.603	67.013
	313.6	94.439	66.618
	315.2	95.425	66.682
	316.8	95.427	66.275
	318.4	94.239	66.255
	320	93.067	66.984
	321.6	92.781	67.473
	323.2	93.753	65.435
	324.8	97.356	65.221
	326.4	102.282	66.63
	328	108.609	70.577
	329.6	116.757	77.828
	331.2	127.723	87.509
	332.8	138.049	98.085
	334.4	148.357	110.066
	336	157.72	121.936
	337.6	168.554	134.833
	339.2	180.462	145.806
	340.8	193.165	154.234
	342.4	204.982	161.313
	344	214.656	169.007
	345.6	224.335	178.364
	347.2	236.923	187.601
	348.8	247.638	195.58
	350.4	259.308	200.295
	352	271.864	204.223
	353.6	279.727	211.589
	355.2	290.579	219.19
	356.8	299.028	222.848
	358.4	306.078	225.614
	360	312.084	227.082
	361.6	318.636	227.936
	363.2	326.76	231.443
	364.8	340.418	231.705
	366.4	353.519	229.349
	368	360.026	227.585
	369.6	363.288	228.018
	371.2	367.119	229.997
	372.8	373.422	234.849
	374.4	371.498	236.174
	376	368.877	233.949
	377.6	367.315	233.169
	379.2	369.933	233.01
	380.8	381.993	233.276
	382.4	395.92	233.873
	384	397.881	232.714
	385.6	395.343	227.09
	387.2	395.704	225.37
	388.8	392.424	224.381
	390.4	396.924	220.332
	392	400.013	219.755
	393.6	402.661	220.02
	395.2	400.959	217.94
	396.8	401.428	219.833
	398.4	405.5	220.983
	400	405.641	214.74
	401.6	406.014	212.762
	403.2	403.552	211.088
	404.8	397.119	207.485
	406.4	394.551	207.919
	408	395.988	210.927
	409.6	393.517	210.855
	411.2	394.659	209.994
	412.8	388.627	209.08
	414.4	389.08	205.738
	416	393.91	205.931
	417.6	393.444	204.196
	419.2	393.044	202.526
	420.8	392.209	200.476
	422.4	386.519	198.971
	424	383.97	199.488
	425.6	386.838	201.908
	427.2	386.528	198.705
	428.8	389.785	194.303
	430.4	390.396	191.447
	432	390.666	189.484
	433.6	386.388	191.756
	435.2	382.777	195.03
	436.8	379.189	195.42
	438.4	381.029	192.813
	440	380.787	190.235
	441.6	379.762	187.463
	443.2	373.768	188.017
	444.8	366.076	189.13
	446.4	361.25	186.337
	448	362.778	182.08
	449.6	366.7	178.422
	451.2	368.321	176.867
	452.8	365.092	179.549
	454.4	364.971	182.815
	456	362.654	183.162
	457.6	361.125	181.493
	459.2	357.136	178.829
	460.8	353.944	176.402
	462.4	349.288	175.078
	464	347.937	176.442
	465.6	346.204	176.011
	467.2	349.786	177.756
	468.8	350.214	178.869
	470.4	354.52	177.393
	472	355.622	174.736
	473.6	352.504	171.553
	475.2	347.74	167.064
	476.8	341.694	165.939
	478.4	336.383	165.99
	480	333.654	165.388
	481.6	331.14	165.667
	483.2	327.505	164.362
	484.8	325.236	163.433
	486.4	320.79	161.942
	488	318.492	162.117
	489.6	320.628	163.32
	491.2	323.769	163.107
	492.8	325.319	162.252
	494.4	325.789	158.746
	496	321.497	155.13
	497.6	315.46	153.639
	499.2	313.469	156.095
	500.8	311.182	156.325
	502.4	310.642	157.604
	504	312.085	156.77
	505.6	311.239	155.831
	507.2	310.855	155.538
	508.8	313.765	155.887
	510.4	311.908	156.035
	512	310.603	157.141
	513.6	308.872	155.859
	515.2	303.569	152.46
	516.8	301.858	148.758
	518.4	301.652	146.054
	520	300.019	146.263
	521.6	299.177	148.893
	523.2	296.62	151.03
	524.8	294.618	151.642
	526.4	294.992	149.869
	528	290.886	148.402
	529.6	288.668	147.591
	531.2	284.875	146.905
	532.8	283.284	146.947
	534.4	283.639	148.03
	536	285.399	149.111
	537.6	284.232	148.506
	539.2	283.53	149.571
	540.8	280.445	148.069
	542.4	277.705	146.676
	544	272.368	144.318
	545.6	270.928	142.38
	547.2	266.856	138.03
	548.8	264.678	137.104
	550.4	264.478	137.771
	552	265.059	139.723
	553.6	263.151	140.832
	555.2	266.077	140.649
	556.8	265.999	139.04
	558.4	269.276	137.602
	560	270.246	135.402
	561.6	270.02	132.966
	563.2	265.909	132.346
	564.8	263.214	130.575
	566.4	262.156	130.504
	568	264.19	131.87
	569.6	265.887	132.728
	571.2	266.3	134.544
	572.8	263.358	135.372
	574.4	261.256	133.452
	576	260.592	130.599
	577.6	260.83	129.139
	579.2	262.16	128.559
	580.8	263.271	130.149
	582.4	261.275	129.792
	584	259.619	129.365
	585.6	256.527	129.204
	587.2	254.614	129.272
	588.8	253.472	128.483
	590.4	254.311	128.822
	592	252.344	128.795
	593.6	252.242	126.94
	595.2	253.186	126.265
	596.8	252.292	125.59
	598.4	251.973	126.027
	600	250.778	127.096
	601.6	248.59	128.998
	603.2	246.834	127.87
	604.8	248.256	127.125
	606.4	246.91	126.875
	608	243.339	127.391
	609.6	241.73	128.03
	611.2	241.486	128.364
	612.8	242.344	126.427
	614.4	247.646	125.259
	616	248.95	122.662
	617.6	246.169	122.243
	619.2	244.148	122.426
	620.8	239.337	121.622
	622.4	236.258	120.631
	624	236.98	121.298
	625.6	235.427	120.552
	627.2	235.199	122.48
	628.8	234.883	125.572
	630.4	236.046
	632	238.351
	633.6	239.903
	635.2	236.893
	636.8	237.8
	638.4	234.982
	640	237.332
	641.6	241.071
	643.2	237.324
	644.8
	646.4
	648
	649.6
	651.2
	652.8
	654.4
	656
	657.6
	659.2
	660.8
	662.4
	664
	665.6
	667.2
	668.8
	670.4
	672
	673.6
	675.2
	676.8
	678.4
	680
	681.6
	683.2
	684.8
	686.4
	688
	689.6
	691.2
	692.8
	694.4
	696
	697.6
	699.2
	700.8
	702.4
	704
	705.6
	707.2
	708.8
	710.4
	712
	713.6
	715.2
	716.8
	718.4
	720
	721.6
	723.2
	724.8
	726.4
	728
	729.6
	731.2
	732.8
	734.4
	736
	737.6
	739.2
	740.8
	742.4
	744
	745.6
	747.2
	748.8
	750.4
	752
	753.6
	755.2
	756.8
	758.4
	760
	761.6
	763.2
	764.8
	766.4
	768
	769.6
	771.2
	772.8
	774.4
	776
	777.6
	779.2
	780.8
	782.4
	784
	785.6
	787.2
	788.8
	790.4
	792
	793.6
	795.2
	796.8
	798.4
	800
	801.6
	803.2
	804.8
	806.4
	808
	809.6
	811.2
	812.8
	814.4
	816
	817.6
	819.2
	820.8
	822.4
	824
	825.6

## Sheet: Figure 1E
		GPN	Ca-GPN
	0	35.19	39.163				-Ca				+ Ca
	1.6	36.018	39.939				100	100	100	100	293.923	232.681	451.059	370.712
	3.2	36.283	40.23
	4.8	36.132	40.632
	6.4	36.011	40.815
	8	35.861	40.465
	9.6	35.959	40.179
	11.2	36.23	40.493
	12.8	36.478	40.723
	14.4	36.801	40.521
	16	37.121	40.617
	17.6	37.146	40.286
	19.2	36.911	40.646
	20.8	37.715	41.051
	22.4	38.452	41.744
	24	38.483	42.13
	25.6	38.227	42.681
	27.2	37.958	42.428
	28.8	37.405	41.876
	30.4	38.072	40.68
	32	38.722	40.339
	33.6	38.881	40.173
	35.2	39.402	40.267
	36.8	39.15	40.429
	38.4	38.836	40.888
	40	38.664	40.676
	41.6	38.951	41.255
	43.2	39.679	41.363
	44.8	40.613	40.987
	46.4	40.819	41.095
	48	40.588	41.24
	49.6	40.432	41.051
	51.2	40.211	41.464
	52.8	39.392	41.752
	54.4	38.563	41.59
	56	38.647	41.842
	57.6	38.954	41.562
	59.2	39.402	41.658
	60.8	40.449	41.745
	62.4	40.567	42.053
	64	40.982	42.08
	65.6	41.12	42.131
	67.2	41.456	42.146
	68.8	40.857	42.166
	70.4	40.882	42.298
	72	40.648	41.998
	73.6	40.613	41.889
	75.2	40.281	41.641
	76.8	40.4	41.375
	78.4	40.789	41.157
	80	41.907	40.692
	81.6	42.226	40.656
	83.2	41.499	41.074
	84.8	41.115	41.423
	86.4	40.336	41.847
	88	40.266	42.407
	89.6	41.489	42.469
	91.2	42.101	42.757
	92.8	42.427	42.564
	94.4	42.708	41.751
	96	42.931	41.121
	97.6	42.389	41.806
	99.2	42.174	43.039
	100.8	41.841	43.716
	102.4	41.777	43.791
	104	41.93	43.354
	105.6	42.964	42.596
	107.2	43.488	41.814
	108.8	44.278	42.79
	110.4	44.156	46.784
	112	44.015	52.616
	113.6	44.466	60.582
	115.2	44.574	67.422
	116.8	44.62	70.566
	118.4	44.446	72.979
	120	43.482	76.387
	121.6	43.307	78.624
	123.2	43.881	81.405
	124.8	44.244	83.998
	126.4	44.519	84.676
	128	44.683	85.416
	129.6	44.356	86.287
	131.2	44.651	86.212
	132.8	44.831	86.677
	134.4	44.965	88.596
	136	45.168	88.688
	137.6	45.546	88.79
	139.2	45.762	89.247
	140.8	46.22	89.404
	142.4	45.962	89.789
	144	45.972	90.626
	145.6	45.907	91.762
	147.2	45.25	92.652
	148.8	45.562	93.987
	150.4	46.1	94.571
	152	46.468	95.299
	153.6	47.197	94.752
	155.2	46.891	95.333
	156.8	46.271	95.631
	158.4	46.189	95.399
	160	46.546	95.53
	161.6	47.089	95.844
	163.2	47.257	95.381
	164.8	46.947	96.243
	166.4	47.21	96.757
	168	47.433	97.601
	169.6	47.602	98.875
	171.2	48.127	98.91
	172.8	47.823	98.084
	174.4	47.96	96.859
	176	48.489	95.799
	177.6	48.998	96.47
	179.2	49.026	97.111
	180.8	49.131	99.116
	182.4	48.431	99.628
	184	49.017	99.258
	185.6	49.23	99.588
	187.2	48.977	100.167
	188.8	48.769	99.855
	190.4	48.742	100.342
	192	48.598	99.2
	193.6	49.297	98.763
	195.2	49.499	99.131
	196.8	50.006	98.588
	198.4	50.247	98.898
	200	50.249	98.865
	201.6	50.024	98.443
	203.2	49.914	98.981
	204.8	49.878	98.626
	206.4	50.875	98.181
	208	51.586	99.777
	209.6	51.447	99.929
	211.2	51.165	100.151
	212.8	50.912	99.229
	214.4	50.5	98.247
	216	50.573	98.275
	217.6	50.96	99.872
	219.2	50.902	100.223
	220.8	51.753	100.887
	222.4	52.555	99.998
	224	53.247	100.32
	225.6	53.19	99.429
	227.2	53.057	98.643
	228.8	53.039	97.639
	230.4	52.774	98.111
	232	52.775	97.587
	233.6	52.975	98.055
	235.2	52.89	98.006
	236.8	53.047	98.475
	238.4	53.574	98.484
	240	53.324	98.897
	241.6	53.338	98.939
	243.2	52.985	98.729
	244.8	52.822	98.584
	246.4	52.517	98.888
	248	52.908	99.121
	249.6	53.343	99.351
	251.2	53.797	100.495
	252.8	54.483	100.202
	254.4	55.096	100.04
	256	54.428	98.825
	257.6	54.248	98.156
	259.2	53.916	97.45
	260.8	54.28	96.698
	262.4	55.559	97.112
	264	56.12	98.331
	265.6	55.436	98.54
	267.2	54.429	99.288
	268.8	53.233	99.569
	270.4	53.062	98.992
	272	53.827	98.895
	273.6	54.581	97.717
	275.2	55.17	96.389
	276.8	55.366	97.101
	278.4	55.535	98.081
	280	55.771	98.627
	281.6	56.503	99.069
	283.2	56.658	97.699
	284.8	56.364	96.306
	286.4	56.293	96.267
	288	55.493	97.4
	289.6	55.088	98.017
	291.2	54.705	99.107
	292.8	54.747	98.938
	294.4	55.191	98.536
	296	56.202	97.855
	297.6	56.468	98.655
	299.2	57.166	98.467
	300.8	57.148	97.842
	302.4	57.233	98.164
	304	57.747	98.02
	305.6	57.989	97.559
	307.2	58.466	97.058
	308.8	59.037	97.506
	310.4	59.068	97.118
	312	58.328	98.132
	313.6	58.238	97.962
	315.2	57.442	97.278
	316.8	57.626	96.707
	318.4	58.528	97.745
	320	58.441	101.143
	321.6	58.095	104.633
	323.2	59.001	105.821
	324.8	60.129	106.049
	326.4	61.611	108.924
	328	63.301	111.948
	329.6	64.082	114.584
	331.2	64.821	116.313
	332.8	66.721	119.597
	334.4	69.115	122.846
	336	70.714	125.818
	337.6	71.759	129.73
	339.2	72.996	135.004
	340.8	73.867	138.387
	342.4	76.954	140.151
	344	80.178	143.557
	345.6	82.209	148.002
	347.2	83.121	152.562
	348.8	84.005	158.044
	350.4	85.159	161.396
	352	88.333	164.586
	353.6	91.439	170.605
	355.2	93.064	176.008
	356.8	95.551	181.804
	358.4	98.078	185.685
	360	100.215	188.91
	361.6	101.418	195.805
	363.2	102.113	202.58
	364.8	102.688	205.646
	366.4	105.338	208.691
	368	107.832	212.764
	369.6	109.205	218.443
	371.2	109.842	224.467
	372.8	109.266	233.656
	374.4	109.979	237.215
	376	110.114	239.504
	377.6	111.044	246.07
	379.2	112.528	249.947
	380.8	113.034	252.567
	382.4	113.495	257.667
	384	115.6	261.801
	385.6	116.895	264.08
	387.2	118.52	266.832
	388.8	121.262	267.349
	390.4	120.94	270.895
	392	121.207	276.769
	393.6	121.736	283.725
	395.2	121.399	286.16
	396.8	121.001	289.404
	398.4	122.476	291.441
	400	122.643	293.868
	401.6	122.968	297.23
	403.2	122.958	298.59
	404.8	122.815	298.497
	406.4	123.813	304.832
	408	125.858	306.62
	409.6	126.786	309.289
	411.2	126.748	307.951
	412.8	127.433	308.56
	414.4	127.778	311.202
	416	127.798	318.485
	417.6	128.124	321.121
	419.2	128.199	324.107
	420.8	127.172	323.32
	422.4	126.845	324.845
	424	127.623	327.295
	425.6	127.863	331.329
	427.2	128.635	333.108
	428.8	131.129	333.756
	430.4	130.685	335.154
	432	130.729	333.648
	433.6	131.617	335.03
	435.2	128.856	338.589
	436.8	127.944	341.125
	438.4	128.037	352.228
	440	127.644	350.992
	441.6	129.344	343.28
	443.2	131.275	337.631
	444.8	130.024	336.192
	446.4	131.266	341.01
	448	131.96	355.83
	449.6	132.091	356.236
	451.2	131.877	352.229
	452.8	132.289	345.457
	454.4	132.069	346.335
	456	133.391	350.65
	457.6	133.341	356.082
	459.2	133.209	355.226
	460.8	133.748	352.359
	462.4	135.28	351.426
	464	136.301	352.658
	465.6	136.169	353.492
	467.2	134.653	358.513
	468.8	133.862	362.413
	470.4	133.893	366.124
	472	133.701	367.738
	473.6	134.362	366.395
	475.2	132.814	363.703
	476.8	132.253	363.222
	478.4	132.356	367.618
	480	133.416	368.178
	481.6	133.507	366.199
	483.2	135.067	362.367
	484.8	135.261	354.392
	486.4	135.81	351.653
	488	137.697	355.099
	489.6	139.497	354.957
	491.2	139.319	358.228
	492.8	138.174	358.082
	494.4	137.358	356.822
	496	136.083	356.37
	497.6	136.829	357.441
	499.2	139.004	357.101
	500.8	140.831	358.896
	502.4	140.449	359.388
	504	140.371	359.002
	505.6	138.634	359.644
	507.2	138.76	359.165
	508.8	140.612	356.74
	510.4	141.291	355.362
	512	140.693	351.733
	513.6	140.79	348.392
	515.2	140.711	355.061
	516.8	141.71	357.624
	518.4	143.732	359.346
	520	143.704	360.247
	521.6	142.989	357.254
	523.2	142.647	358.202
	524.8	142.718	361.786
	526.4	144.025	358.505
	528	145.939	356.207
	529.6	145.36	350.89
	531.2	144.701	347.873
	532.8	144.297	354.376
	534.4	143.162	354.545
	536	143.986	353.059
	537.6	145.684	350.978
	539.2	146.423	347.48
	540.8	147.693	348.286
	542.4	149.572	356.171
	544	149.16	354.736
	545.6	148.75	353.003
	547.2	149.174	349.658
	548.8	149.187	349.365
	550.4	148.468	348.275
	552	148.085	351.174
	553.6	147.16	349.834
	555.2	146.568	351.183
	556.8	147.248	354.195
	558.4	148.265	361.574
	560	149.748	362.142
	561.6	149.777	360.331
	563.2	150.907	353.836
	564.8	152.684	350.456
	566.4	153.984	353.108
	568	154.402	356.348
	569.6	154.61	356.441
	571.2	152.879	362.045
	572.8	152.703	360.8
	574.4	153.911	359.186
	576	153.781	362.752
	577.6	154.861	362.962
	579.2	155.086	359.842
	580.8	154.711	361.093
	582.4	153.358	356.267
	584	153.006	350.264
	585.6	153.842	350.886
	587.2	154.274	361.245
	588.8	154.918	367.605
	590.4	155.634	369.543
	592	156.419	370.636
	593.6	157.34	364.605
	595.2	157.575	358.654
	596.8	156.885	360.51
	598.4	156.605	360.206
	600	155.538	359.008
	601.6	156.469	360.585
	603.2	156.99	359.161
	604.8	155.928	356.137
	606.4	157.753	357.117
	608	157.828	359.41
	609.6	157.851	359.32
	611.2	157.901	356.453
	612.8	158.151	352.909
	614.4	157.962	349.407
	616	159.254	348.275
	617.6	159.564	350.738
	619.2	160.206	358.698
	620.8	160.38	364.63
	622.4	160.59	366.007
	624	160.484	364.754
	625.6	160.893	361.917
	627.2	159.961	358.535
	628.8	158.943	362.695
	630.4	158.852	362.58
	632	160.339	363.33
	633.6	162.717	363.92
	635.2	163.935	364.622
	636.8	164.69	364.21
	638.4	165.849	362.688
	640	166.983	363.184
	641.6	168.267	362.762
	643.2	168.006	366.62
	644.8	166.64	372.3
	646.4	165.973	373.753
	648	166.321
	649.6	166.982
	651.2	166.761
	652.8	164.953
	654.4	162.308
	656	159.793
	657.6
	659.2
	660.8
	662.4
	664
	665.6
	667.2
	668.8
	670.4
	672
	673.6
	675.2
	676.8
	678.4
	680
	681.6
	683.2
	684.8
	686.4
	688
	689.6
	691.2
	692.8
	694.4
	696
	697.6
	699.2
	700.8
	702.4
	704
	705.6
	707.2
	708.8
	710.4
	712
	713.6
	715.2
	716.8
	718.4
	720
	721.6
	723.2
	724.8
	726.4
	728
	729.6
	731.2
	732.8
	734.4
	736
	737.6
	739.2
	740.8
	742.4
	744
	745.6
	747.2
	748.8
	750.4
	752
	753.6
	755.2
	756.8
	758.4
	760
	761.6
	763.2
	764.8
	766.4
	768
	769.6
	771.2
	772.8
	774.4
	776
	777.6
	779.2
	780.8
	782.4
	784
	785.6
	787.2
	788.8
	790.4
	792
	793.6
	795.2
	796.8
	798.4
	800
	801.6
	803.2
	804.8
	806.4
	808
	809.6
	811.2
	812.8
	814.4
	816
	817.6
	819.2
	820.8
	822.4
	824
	825.6

## Sheet: Figure 1F
Time(s)		Ca-CCCP	CCCP
0		121.381	111.307
1.4		122.424	112.204
2.8		119.165	110.204		-Ca2+				+ Ca2+
4.2		121.574	113.732		100	100	100		241.166	263.646	303.236
5.6		120.508	111.297
7		114.292	113.445
8.4		121.198	115.478
9.8		117.304	105.211
11.2		116.879	107.243
12.6		116.851	112.589
14		129.618	113.16
15.4		111.887	110.523
16.8		112.555	111.971
18.2		114.466	110.857
19.6		115.209	108.501
21		113.414	111.039
22.4		114.091	111.563
23.8		116.815	114.924
25.2		111.397	112.299
26.6		113.294	112.828
28		111.676	110.38
29.4		112.595	106.655
30.8		110.359	112.671
32.2		116.027	111.131
33.6		119.153	110.677
35		115.325	107.299
36.4		123.147	109.666
37.8		113.854	109.977
39.2		115.375	110.502
40.6		116.846	99.551
42		113.927	105.478
43.4		109.414	106.485
44.8		116.914	110.876
46.2		112.781	110.11
47.6		111.438	107.681
49		116.84	104.854
50.4		116.177	110.454
51.8		112.576	105.703
53.2		119.195	102.166
54.6		113.284	101.6
56		116.191	109.775
57.4		109.296	104.83
58.8		112.021	101.324
60.2		114.782	106.017
61.6		110.73	98.961
63		111.835	104.947
64.4		112.151	104.937
65.8		112.705	103.754
67.2		119.092	105.942
68.6		113.446	104.727
70		113.227	106.848
71.4		117.79	102.592
72.8		110.489	103.779
74.2		106.37	106.33
75.6		113.16	108.49
77		113.884	105.565
78.4		114.551	104.706
79.8		110.583	100.1
81.2		116.992	105.921
82.6		116.527	104.71
84		115.288	105.56
85.4		113.856	109.878
86.8		114.008	104.883
88.2		115.785	104.613
89.6		111.722	103.486
91		112.442	100.108
92.4		113.977	103.634
93.8		113.65	104.385
95.2		113.347	106.472
96.6		118.082	104.719
98		112.524	107.805
99.4		25.698*	104.84
100.8		41.684*	102.608
102.2		157.926	108.872
103.6		177.622	104.215
105		180.289	107.115
106.4		192.808	103.187
107.8		190.291	104.281
109.2		201.32	105.43
110.6		190.345	103.603
112		190.564	102.313
113.4		192.106	97.698
114.8		191.485	104.056
116.2		190.313	101.396
117.6		190.982	103.569
119		206.363	108.25
120.4		192.643	103.227
121.8		189.455	103.524
123.2		194.862	105.434
124.6		196.514	102.413
126		201.805	104.941
127.4		185.363	101.88
128.8		195.609	100.946
130.2		192.405	106.878
131.6		209.188	101.84
133		194.959	104.137
134.4		196.485	111.706
135.8		199.617	104.616
137.2		193.766	103.317
138.6		187.648	103.718
140		190.377	103.713
141.4		189.565	106.259
142.8		189.154	103.364
144.2		187.399	106.694
145.6		181.329	100.708
147		191.629	103.716
148.4		192.722	105.614
149.8		192.976	99.675
151.2		191.535	103.197
152.6		194.923	104.597
154		194.207	102.412
155.4		182.164	101.129
156.8		187.459	99.75
158.2		185.877	103.641
159.6		188.109	105.743
161		199.056	103.022
162.4		191.932	100.598
163.8		189.648	99.776
165.2		198.201	103.058
166.6		186.046	105.262
168		196.642	102.593
169.4		182.269	108.34
170.8		185.344	102.213
172.2		182.118	101.774
173.6		176.604	101.398
175		187.921	100.897
176.4		184.806	104.219
177.8		178.372	106.044
179.2		194.92	99.488
180.6		197.389	101.947
182		190.211	101.89
183.4		191.862	104.591
184.8		186.488	100.046
186.2		191.002	104.357
187.6		188.533	104.312
189		196.693	102.122
190.4		179.664	100.086
191.8		198.454	104.238
193.2		191.096	105.299
194.6		182.796	102.125
196		186.995	102.989
197.4		182.603	101.346
198.8		197.228	102.39
200.2		193.485	105.408
201.6		189.048	103.387
203		194.735	105.029
204.4		179.072	101.989
205.8		191.714	103.214
207.2		178.859	104.805
208.6		197.48	102.636
210		191.267	101.175
211.4		187.146	97.455
212.8		181.055	101.9
214.2		180.161	102.468
215.6		191.14	100.447
217		191.121	104.385
218.4		187.371	105.587
219.8		177.734	101.383
221.2		182.287	100.358
222.6		194.791	104.435
224		186.954	97.904
225.4		184.969	101.478
226.8		190.407	99.96
228.2		201.704	102.566
229.6		195.166	100.884
231		191.358	100.984
232.4		188.418	99.323
233.8		186.328	101.417
235.2		190.102	100.872
236.6		195.615	104.358
238		176.024	102.641
239.4		195.565	102.01
240.8		189.838	103.983
242.2		185.99	102.704
243.6		196.542	101.912
245		197.143	104.45
246.4		187.884	101.601
247.8		187.578	97.342
249.2		193.911	102.838
250.6		189.91	101.136
252		177.176	103.25
253.4		190.481	103.126
254.8		185.826	98.837
256.2		189.119	105.443
257.6		190.103	103.355
259		195.432	99.406
260.4		182.079	100.712
261.8		188.222	99.46
263.2		184.301	101.489
264.6		196.185	101.436
266		187.432	100.735
267.4		190.78	97.741
268.8		190.708	99.185
270.2		200.006	100.442
271.6		198.129	103.209
273		206.069	103.947
274.4		194.924	97.127
275.8		196.614	104.687
277.2		199.359	101.3
278.6		184.755	99.569
280		193.644	102.684
281.4		198.758	102.04
282.8		200.634	101.14
284.2		200.304	101.625
285.6		195.647	101.153
287		193.772	101.498
288.4		198.433	101.128
289.8		190.985	100.6
291.2		213.498	101.853
292.6		185.982	104.289
294		186.512	101.484
295.4		197.034	100.194
296.8		188.985	102.707
298.2		185.339	68.206*
299.6		202.606	109.631
301		195.966	109.589
302.4		189.739	129.126
303.8		200.074	129.396
305.2		196.908	150.419
306.6		196.804	148.575
308		87.27*	152.939
309.4		202.509	159.133
310.8		255.47	162.083
312.2		267.806	158.887
313.6		299.868	159.091
315		300.757	160.593
316.4		324.042	158.169
317.8		313.452	159.115
319.2		317.28	156.829
320.6		325.471	159.088
322		369.47	149.39
323.4		351.273	161.316
324.8		314.89	155.554
326.2		346.657	163.24
327.6		350.087	157.628
329		357.379	156.745
330.4		332.177	153.84
331.8		362.599	152.639
333.2		356.946	157.218
334.6		359.046	148.785
336		346.066	152.671
337.4		351.47	157.194
338.8		335.504	154.421
340.2		335.17	146.535
341.6		318.819	153.089
343		349.626	154.738
344.4		342.036	153.561
345.8		316.856	146.003
347.2		328.75	143.531
348.6		321.259	151.856
350		333.562	145.499
351.4		333.683	146.243
352.8		311.696	145.803
354.2		326.652	153.863
355.6		315.744	146.688
357		326	147.711
358.4		294.957	142.944
359.8		326.055	149.59
361.2		284.599	143.754
362.6		308.526	142.819
364		304.036	148.711
365.4		290.653	143.734
366.8		306.299	145.257
368.2		315.282	148.88
369.6		301.35	143.789
371		310.273	141.545
372.4		323.49	139.936
373.8		275.689	144.545
375.2		278.661	139.43
376.6		296.509	138.589
378		285.151	140.867
379.4		300.382	143.585
380.8		273.16	140.893
382.2		303.729	137.658
383.6		297.951	139.538
385		292.276	141.808
386.4		294.474	142.407
387.8		271.342	143.889
389.2		289.694	143.212
390.6		282.923	145.227
392		289.475	133.68
393.4		299.233	138.274
394.8		294.964	136.114
396.2		302.275	142.834
397.6		296.934	143.448
399		283.745	142.527
400.4		282.786	138.015
401.8		267.92	136.994
403.2		272.208	140.221
404.6		301.718	136.73
406		295.485	143.884
407.4		278.923	141.258
408.8		294.414	133.314
410.2		284.892	136.191
411.6		270.166	137.229
413		274.521	140.149
414.4		270.34	135.913
415.8		280.052	137.103
417.2		264.337	135.006
418.6		268.41	141.749
420		278.179	136.778
421.4		275.37	134.785
422.8		275.988	137.66
424.2		266.029	140.025
425.6		294.622	139.199
427		273.901	134.445
428.4		279.302	132.168
429.8		286.654	137.381
431.2		279.282	132.879
432.6		269.63	134.546
434		274.626	134.445
435.4		273.532	137.073
436.8		273.118	140.281
438.2		270.228	141.31
439.6		287.964	138.756
441		284.412	134.591
442.4		284.638	140.144
443.8		281.621	132.398
445.2		272.873	135.025
446.6		281.514	143.207
448		269.632	135.63
449.4		279.731	136.149
450.8		284.709	134.815
452.2		274.875	130.456
453.6		254.502	137.044
455		273.565	131.527
456.4		273.59	136.571
457.8		271.52	136.346
459.2		280.897	131.984
460.6		283.111	136.318
462		271.45	142.354
463.4		282.847	133.744
464.8		269.888	136.703
466.2		276.166	138.666
467.6		273.165	140.895
469		293.471	137.638
470.4		270.848	134.407
471.8		282.754	136.178
473.2		285.083	133.669
474.6		295.499	135.983
476		255.908	137.474
477.4		275.919	131.132
478.8		275.376	139.999
480.2		300.992	136.931
481.6		278.17	127.857
483		274.036	139.4
484.4		292.216	136.594
485.8		266.513	136.456
487.2		274.211	134.129
488.6		270.98	133.079
490		276.431	141.908
491.4		283.045	135.96
492.8		266.936	135.36
494.2		280.768	137.507
495.6		277.458	139.252
497		272.01	134.357
498.4		262.727	132.729
499.8		281.692	139.1
501.2		276.159	137.815
502.6		289.463	139.73
504		284.26	135.832
505.4		278.51	142.183
506.8		299.872	136.325
508.2		281.291	132.993
509.6		279.895	137.978
511		285.839	138.067
512.4		260.045	137.183
513.8		291.798	137.872
515.2		288.95	135.736
516.6		289.05	135.307
518		287.456	129.923
519.4		274.089	147.543
520.8		282.201	139.835
522.2		292.424	137.793
523.6		280.628	135.151
525		291.927	139.571
526.4		286.502	134.993
527.8		277.692	129.5
529.2		276.229	134.099
530.6		293.408	139.922
532		321.59	139.923
533.4		301.78	137.812
534.8		280.744	136.564
536.2		290.77	131.616
537.6		296.228	133.21
539		278.246	139.281
540.4		279.379	139.782
541.8		300.337	136.292
543.2		297.737	135.523
544.6		282.162	139.53
546		309.599	135.873
547.4		308.532	138.203
548.8		300.089	141.802
550.2		288.6	141.869
551.6		294.221	137.271
553		279.232	136.633
554.4		275.179	135.38
555.8		287.642	133.427
557.2		288.723	141.222
558.6		287.019	139.921
560		311.532	141.867
561.4		295.837	140.946
562.8		287.452	137.441
564.2		305.911	140.728
565.6		306.775	138.801
567		292.642	141.013
568.4		274.95	143.996
569.8		282.51	138.829
571.2		282.375	148.617
572.6		268.485	137.545
574		268.807	140.006
575.4		285.82	136.715
576.8		294.123	140.89
578.2		301.704	141.679
579.6		300.098	137.439
581		299.305	137.823
582.4		290.667	141.261
583.8		297.676	147.087
585.2		302.327	138.919
586.6		294.304	136.39
588		299.024	140.891
589.4		314.788	140.728
590.8		290.747	140.401
592.2		319.628	138.945
593.6		294.163	137.671
595		298.525	135.319
596.4		284.135	134.89
597.8		300.078	141.055
599.2		295.629	136.754
600.6		287.602	134.689
602		307.145	134.535
603.4		316.315	142.928
604.8			141.148
606.2			142.41
607.6			134.955
609			139.611
610.4			141.934
611.8			142.008
613.2			148.084
614.6			141.955
616			141.707
617.4
618.8
620.2
621.6
623
624.4
625.8
627.2
628.6
630
631.4
632.8
634.2
635.6
637
638.4
639.8
641.2
642.6
644
645.4
646.8
648.2
649.6
651
652.4
653.8
655.2
656.6
658
659.4
660.8
662.2
663.6
665
666.4
667.8
669.2
670.6
672
673.4
674.8
676.2
677.6
679
680.4
681.8
683.2
684.6
686
687.4
688.8
690.2
691.6
693
694.4
695.8
697.2
698.6
700
701.4
702.8
704.2
705.6
707
708.4
709.8
711.2
712.6
714
715.4
716.8
718.2
719.6
721
722.4
723.8
725.2
726.6
728
729.4
730.8
732.2
733.6
735
736.4
737.8
739.2
740.6
742
743.4
744.8
746.2
747.6
749
750.4
751.8
753.2
754.6
756
757.4
758.8
760.2
761.6
763
764.4
765.8
767.2
768.6
770
771.4
772.8
774.2
775.6
777
778.4
779.8
781.2
782.6
784
785.4
786.8
788.2
789.6
791
792.4
793.8
795.2
796.6
798
799.4
800.8
802.2
803.6
805
806.4
807.8
809.2
810.6
812
813.4
814.8
816.2
817.6
819
820.4
821.8
823.2
824.6
826
827.4
828.8
830.2
831.6
833
834.4
835.8
837.2
838.6
840
841.4
842.8
844.2
845.6
847
848.4
849.8
851.2
852.6
854
855.4
856.8
858.2
859.6
861
862.4
863.8
865.2
866.6
868
869.4
870.8
872.2
873.6
875
876.4
877.8
879.2
880.6
882
883.4
884.8
886.2
887.6
889
890.4
891.8
893.2
894.6
896
897.4
898.8

## Sheet: Figure 1G
	Time(s)		Ca-Nig	Nig
	0		121.721	131.678
	1.4		118.153	129.317
	2.8		126.092	123.719				-Ca2+				+ Ca2+
	4.2		123.826	124.626				100	100	100		154.212	220.271	158.483
	5.6		119.277	122.117
	7		124.721	117.859
	8.4		120.684	125.635
	9.8		124.005	121.093
	11.2		124.349	124.927
	12.6		119.922	130.96
	14		118.176	134.455
	15.4		121.85	134.393
	16.8		121.803	119.24
	18.2		112.189	123.373
	19.6		120.701	130.687
	21		117.504	127.312
	22.4		129.987	125.557
	23.8		116.705	128.58
	25.2		115.946	127.92
	26.6		125.106	116.541
	28		129.286	127.682
	29.4		133.769	124.976
	30.8		117.66	124.361
	32.2		126.625	125.698
	33.6		116.735	119.641
	35		120.228	125.579
	36.4		113.273	117.236
	37.8		120.893	118.274
	39.2		114.834	120.914
	40.6		117.267	131.848
	42		119.015	124.496
	43.4		118.274	117.167
	44.8		120.554	120.619
	46.2		121.931	121.761
	47.6		114.226	122.758
	49		117.218	119.367
	50.4		116.118	119.991
	51.8		120.623	125.307
	53.2		118.444	123.567
	54.6		115.07	118.086
	56		111.363	126.984
	57.4		115.792	120.863
	58.8		115.934	124.48
	60.2		110.532	120.063
	61.6		111.779	117.699
	63		115.848	117.612
	64.4		115.081	125.285
	65.8		117.863	117.076
	67.2		118.151	120.991
	68.6		113.267	121.183
	70		120.833	119.685
	71.4		118.951	122.333
	72.8		106.39	122.369
	74.2		117.09	121.817
	75.6		118.501	127.617
	77		113.735	122.224
	78.4		113.983	119.395
	79.8		116.378	125.189
	81.2		107.828	129.352
	82.6		111.622	115.933
	84		114.573	118.889
	85.4		108.282	135.061
	86.8		118.085	116.467
	88.2		111.662	122.234
	89.6		111.235	122.674
	91		113.402	111.43
	92.4		117.371	114.947
	93.8		112.855	117.172
	95.2		116.589	119.792
	96.6		108.25	115.727
	98		118.234	120.837
	99.4		108.567	118.07
	100.8		42.991*	109.851
	102.2		158.795	119.202
	103.6		163.933	119.582
	105		161.326	124.584
	106.4		172.415	122.177
	107.8		167.295	119.799
	109.2		164.761	121.343
	110.6		178.845	123.227
	112		187.129	113.855
	113.4		187.75	113.386
	114.8		168.983	118.707
	116.2		166.617	114.289
	117.6		173.018	111.895
	119		167.901	119.83
	120.4		174.896	119.303
	121.8		175.876	114.661
	123.2		171.667	113.721
	124.6		171.703	111.588
	126		162.759	121.44
	127.4		174.625	111.153
	128.8		172.957	121.393
	130.2		176.584	113.112
	131.6		177.772	110.088
	133		175.832	115.403
	134.4		163.486	113.299
	135.8		168.739	115.256
	137.2		169.972	118.004
	138.6		165.649	123.102
	140		184.148	116.532
	141.4		161.746	115.22
	142.8		180.962	115.045
	144.2		170.441	111.57
	145.6		166.601	110.537
	147		163.554	113.373
	148.4		165.347	119.994
	149.8		164.557	104.383
	151.2		169.158	118.956
	152.6		162.267	112.792
	154		168.874	110.354
	155.4		169.878	108.356
	156.8		186.248	115.523
	158.2		166.486	113.078
	159.6		169.588	116.992
	161		162.985	112.836
	162.4		165.251	110.107
	163.8		171.393	114.42
	165.2		177.549	113.377
	166.6		158.61	115.066
	168		161.126	115.69
	169.4		168.244	108.358
	170.8		156.602	114.119
	172.2		157.857	111.227
	173.6		167.542	113.715
	175		165.394	111.221
	176.4		159.48	110.31
	177.8		165.685	108.146
	179.2		163.876	116.513
	180.6		166.529	107.77
	182		170.208	106.682
	183.4		162.893	119.752
	184.8		166.276	113.609
	186.2		160.88	110.562
	187.6		157.56	115.078
	189		166.815	109.254
	190.4		162.59	115.306
	191.8		167.93	114.814
	193.2		158.858	110.883
	194.6		164.734	110.073
	196		167.354	113.743
	197.4		158.497	108.506
	198.8		167.858	109.63
	200.2		161.403	106.706
	201.6		163.937	120.546
	203		156.867	106.962
	204.4		170.148	111.256
	205.8		164.625	112.365
	207.2		167.429	109.355
	208.6		166.525	104.162
	210		159.777	106.818
	211.4		168.632	109.555
	212.8		165.06	106.38
	214.2		161.913	106.747
	215.6		158.563	106.334
	217		158.306	105.328
	218.4		167.765	103.935
	219.8		176.402	107.781
	221.2		167.564	112.67
	222.6		163.176	110.683
	224		164.291	105.606
	225.4		172.846	107.344
	226.8		162.629	103.743
	228.2		170.44	107.79
	229.6		158.123	113.009
	231		167.489	109.715
	232.4		160.582	111.052
	233.8		173.022	112.257
	235.2		165.852	111.385
	236.6		169.079	103.303
	238		169.64	111.894
	239.4		158.767	109.645
	240.8		177.249	103.763
	242.2		163.345	102.416
	243.6		161.861	114.707
	245		165.713	112.901
	246.4		170.571	112.427
	247.8		163.582	108.609
	249.2		162.989	106.769
	250.6		166.926	113.63
	252		179.536	100.475
	253.4		160.975	106.628
	254.8		178.565	106.294
	256.2		161.996	104.802
	257.6		176.366	107.116
	259		169.534	111.537
	260.4		178.677	107.895
	261.8		171.326	107.341
	263.2		173.643	108.526
	264.6		167.498	104.541
	266		173.244	107.186
	267.4		162.943	105.352
	268.8		163.151	108.212
	270.2		164.687	112.06
	271.6		160.22	107.324
	273		174.798	103.822
	274.4		162.584	109.652
	275.8		169.178	103.721
	277.2		176.931	109.638
	278.6		168.082	110.517
	280		165.813	106.07
	281.4		169.337	109.511
	282.8		178.804	107.172
	284.2		171.501	106.132
	285.6		181.707	104.395
	287		168.018	112.81
	288.4		182.472	110.177
	289.8		162.497	103.289
	291.2		166.504	109.626
	292.6		172.72	102.718
	294		162.951	104.675
	295.4		179.214	106.373
	296.8		170.919	109.897
	298.2		167.2	109.64
	299.6		179.651	103.839
	301		180.303	70.442*
	302.4		169.978	74.865*
	303.8		174.038	107.309
	305.2		177.002	116.644
	306.6		166.504	122.677
	308		174.333	122.959
	309.4		178.076	121.472
	310.8		175.626	130.607
	312.2		174.802	119.541
	313.6		171.047	112.179
	315		176.808	115.351
	316.4		101.732*	123.513
	317.8		178.981	118.668
	319.2		190.725	117.627
	320.6		195.03	118.747
	322		203.155	125.708
	323.4		203.501	112.922
	324.8		194.823	120.546
	326.2		214.125	117.798
	327.6		193.059	113.659
	329		213.908	123.018
	330.4		207.201	118.581
	331.8		213.684	117.111
	333.2		189.9	118.561
	334.6		277.09*	116.52
	336		203.54	123.14
	337.4		203.523	118.649
	338.8		210.359	124.074
	340.2		216.148	118.563
	341.6		197.517	125.181
	343		199.266	117.578
	344.4		197.002	116.631
	345.8		208.933	126.17
	347.2		209.407	117.983
	348.6		210.463	117.329
	350		217.977	121.685
	351.4		210.84	123.525
	352.8		204.469	119.095
	354.2		224.628	125.25
	355.6		216.505	117.792
	357		213.192	118.299
	358.4		214.773	125.236
	359.8		218.833	118.076
	361.2		207.049	120.924
	362.6		209.253	123.436
	364		206.559	114.537
	365.4		198.583	119.233
	366.8		201.785	124.691
	368.2		220.754	120.662
	369.6		224.627	124.838
	371		212.1	120.099
	372.4		211.465	117.29
	373.8		200.769	113.828
	375.2		232.547	121.09
	376.6		214.023	126.731
	378		208.971	124.744
	379.4		207.394	122.362
	380.8		232.246	127.487
	382.2		213.961	120.897
	383.6		203.05	119.013
	385		225.253	125.6
	386.4		196.505	126.898
	387.8		207.714	130.696
	389.2		207.728	122.44
	390.6		207.472	114.397
	392		220.343	129.203
	393.4		225.857	121.594
	394.8		217.781	124.571
	396.2		208.133	122.052
	397.6		225.185	123.424
	399		215.883	126.873
	400.4		223.905	124.165
	401.8		206.087	123.635
	403.2		208.563	119.033
	404.6		231.547	129.256
	406		204.38	117.028
	407.4		210.171	125.993
	408.8		210.128	127.036
	410.2		214.891	134.744
	411.6		219.864	128.636
	413		203.83	124.449
	414.4		207.245	132.856
	415.8		226.249	125.836
	417.2		212.513	122.326
	418.6		221.294	124.186
	420		213.363	119.238
	421.4		217.44	124.855
	422.8		216.161	128.963
	424.2		213.39	122.905
	425.6		216.153	118.649
	427		218.125	129.503
	428.4		224.532	130.329
	429.8		210.266	120.961
	431.2		214.903	117.726
	432.6		213.09	126.431
	434		220.333	125.264
	435.4		210.834	121.411
	436.8		209.637	127.25
	438.2		208.151	132.357
	439.6		218.176	121.021
	441		205.524	124.963
	442.4		226.811	128.933
	443.8		229.967	124.826
	445.2		222.41	130.409
	446.6		212.602	122.868
	448		222.851	128.649
	449.4		235.152	123.057
	450.8		232.375	132.416
	452.2		115.551*	121.595
	453.6		216.624	122.923
	455		238.653	124.547
	456.4		230.298	128.114
	457.8		210.903	125.106
	459.2		221.934	127.681
	460.6		179.822*	129.893
	462		203.631	126.684
	463.4		223.009	128.136
	464.8		221.426	122.928
	466.2		207.332	125.986
	467.6		218.834	121.257
	469		243.058	128.758
	470.4		219.306	129.595
	471.8		235.419	129.903
	473.2		211.803	123.154
	474.6		220.256	121.819
	476		228.954	128.292
	477.4		235.816	129.169
	478.8		239.623	131.801
	480.2		226.735	130.123
	481.6		220.066	122.209
	483		238.771	119.253
	484.4		232.582	121.047
	485.8		228.427	125.925
	487.2		239.259	117.779
	488.6		233.351	136.097
	490		216.573	129.229
	491.4		228.844	131.575
	492.8		228.559	119.635
	494.2		221.894	127.336
	495.6		230.221	129.07
	497		230.196	125.221
	498.4		231.099	127.789
	499.8		218.132	128.953
	501.2		232.288	135.151
	502.6		225.91	131.191
	504		110.036*	126.09
	505.4		229.389	130.926
	506.8		242.733	123.046
	508.2		224.762	126.2
	509.6		241.711	123.12
	511		233.363	127.436
	512.4		253.834	132.196
	513.8		235.115	133.242
	515.2		249.295	124.444
	516.6		242.358	124.649
	518		227.923	140.547
	519.4		230.985	130.888
	520.8		238.474	128.391
	522.2		226.618	132.18
	523.6		235.993	123.113
	525		231.588	132.537
	526.4		234.739	138.405
	527.8		236.907	126.193
	529.2		226.742	127.458
	530.6		242.515	134.58
	532		300.981*	130.274
	533.4		240.269	131.406
	534.8		226.105	130.712
	536.2		244.043	128.066
	537.6		242.095	119.795
	539		244.925	131.827
	540.4		245.655	124.504
	541.8		245.885	130.264
	543.2		231.794	124.774
	544.6		98.895*	131.927
	546		242.946	127.438
	547.4		233.417	136.971
	548.8		239.155	131.56
	550.2		237.67	127.606
	551.6		237.513	124.516
	553		254.822	131.345
	554.4		244.11	126.338
	555.8		246.361	125.916
	557.2		239.767	130.282
	558.6		242.893	138.719
	560		258.228	133.842
	561.4		226.699	126.184
	562.8		250.893	130.88
	564.2		249.018	129.224
	565.6		240.805	137.564
	567		254.383	129.077
	568.4		249.348	134.091
	569.8		243.92	134.606
	571.2		250.96	128.002
	572.6		246.135	136.722
	574		261.009	138.999
	575.4		247.824	127.96
	576.8		253.375	123.576
	578.2		248.023	122.864
	579.6		240.488	130.211
	581		252.651	127.615
	582.4		230.778	129.457
	583.8		254.264	128.924
	585.2		249.542	131.077
	586.6		257.041	135.416
	588		224.663	124.756
	589.4		235.706	124.117
	590.8		251.438	134.894
	592.2		236.502	133.012
	593.6		245.625	123.909
	595		231.009	133.412
	596.4		242.329	131.512
	597.8		244.297	132.669
	599.2		262.236	131.28
	600.6		250.918	137.776
	602		247.833	124.947
	603.4		260.101	131.528
	604.8		239.55	136.27
	606.2		263.754	120.289
	607.6		243.109	116.767
	609		244.524	133.776
	610.4		259.841	134.356
	611.8		248.829	129.613
	613.2		253.451	128.421
	614.6		266.599	129.615
	616		252.161	130.053
	617.4		246.652
	618.8		249.516
	620.2		254.921
	621.6
	623
	624.4
	625.8
	627.2
	628.6
	630
	631.4
	632.8
	634.2
	635.6
	637
	638.4
	639.8
	641.2
	642.6
	644
	645.4
	646.8
	648.2
	649.6
	651
	652.4
	653.8
	655.2
	656.6
	658
	659.4
	660.8
	662.2
	663.6
	665
	666.4
	667.8
	669.2
	670.6
	672
	673.4
	674.8
	676.2
	677.6
	679
	680.4
	681.8
	683.2
	684.6
	686
	687.4
	688.8
	690.2
	691.6
	693
	694.4
	695.8
	697.2
	698.6
	700
	701.4
	702.8
	704.2
	705.6
	707
	708.4
	709.8
	711.2
	712.6
	714
	715.4
	716.8
	718.2
	719.6
	721
	722.4
	723.8
	725.2
	726.6
	728
	729.4
	730.8
	732.2
	733.6
	735
	736.4
	737.8
	739.2
	740.6
	742
	743.4
	744.8
	746.2
	747.6
	749
	750.4
	751.8
	753.2
	754.6
	756
	757.4
	758.8
	760.2
	761.6
	763
	764.4
	765.8
	767.2
	768.6
	770
	771.4
	772.8
	774.2
	775.6
	777
	778.4
	779.8
	781.2
	782.6
	784
	785.4
	786.8
	788.2
	789.6
	791
	792.4
	793.8
	795.2
	796.6
	798
	799.4
	800.8
	802.2
	803.6
	805
	806.4
	807.8
	809.2
	810.6
	812
	813.4
	814.8
	816.2
	817.6
	819
	820.4
	821.8
	823.2
	824.6
	826
	827.4
	828.8
	830.2
	831.6
	833
	834.4
	835.8
	837.2
	838.6
	840
	841.4
	842.8
	844.2
	845.6
	847
	848.4
	849.8
	851.2
	852.6
	854
	855.4
	856.8
	858.2
	859.6
	861
	862.4
	863.8
	865.2
	866.6
	868
	869.4
	870.8
	872.2
	873.6
	875
	876.4
	877.8
	879.2
	880.6
	882
	883.4
	884.8
	886.2
	887.6
	889
	890.4
	891.8
	893.2
	894.6
	896
	897.4
	898.8

## Sheet: Figure 1H
			No TG	with TG
		0	69.795	54.016
		1.6	69.097	53.546					No TG				With TG
		3.2	68.923	53.561					1.76	2.03	4.11		10.39	9.32	7.52
		4.8	69.273	53.483
		6.4	69.513	53.017
		8	69.258	52.897
		9.6	69.007	52.756
		11.2	67.38	52.311
		12.8	66.391	52.472
		14.4	65.795	52.679
		16	65.189	52.63
		17.6	64.553	52.782
		19.2	64.366	52.83
		20.8	63.061	52.826
		22.4	62.713	53.608
		24	62.249	53.829
		25.6	62.203	53.827
		27.2	62.009	53.335
		28.8	61.838	53.435
		30.4	61.23	53.482
		32	61.175	53.947
		33.6	61.235	53.935
		35.2	60.867	53.554
		36.8	60.297	53.368
		38.4	59.331	54.202
		40	58.481	54.532
		41.6	57.731	54.837
		43.2	57.74	54.993
		44.8	57.753	54.563
		46.4	57.961	54.571
		48	58.256	55.229
		49.6	58.132	55.767
		51.2	58.104	56.349
		52.8	58.195	55.9
		54.4	58.104	55.137
		56	57.875	54.636
		57.6	57.776	55.001
		59.2	57.596	56.077
		60.8	56.728	56.749
		62.4	56.798	56.635
		64	56.462	56.35
		65.6	56.057	56.648
		67.2	56	57.448
		68.8	56.729	58.409
		70.4	57.111	58.647
		72	57.214	58.637
		73.6	56.924	58.299
		75.2	56.761	58.117
		76.8	56.478	58.334
		78.4	56.96	58.596
		80	58.202	59.375
		81.6	57.9	59.729
		83.2	58.476	59.855
		84.8	58.45	59.477
		86.4	57.759	59.675
		88	56.604	60.395
		89.6	57.124	61.537
		91.2	57.857	62.254
		92.8	58.731	62.299
		94.4	58.956	62.188
		96	59.464	61.696
		97.6	59.105	61.618
		99.2	59.648	61.53
		100.8	59.967	61.151
		102.4	60.144	62.692
		104	60.704	66.669
		105.6	61.604	72.148
		107.2	62.072	78.999
		108.8	61.683	84.808
		110.4	62.246	87.581
		112	65.164	89.137
		113.6	69.774	89.938
		115.2	74.925	90.616
		116.8	79.603	91.513
		118.4	82.835	92.126
		120	85.278	93.104
		121.6	87.2	93.595
		123.2	88.629	94.703
		124.8	90.008	95.989
		126.4	91.5	97.312
		128	92.594	97.868
		129.6	92.857	97.991
		131.2	92.451	98.601
		132.8	92.447	100.019
		134.4	92.611	101.63
		136	93.674	102.316
		137.6	95.009	102.495
		139.2	96.443	101.598
		140.8	97.834	101.512
		142.4	98.825	102.091
		144	98.521	103.713
		145.6	98.323	104.054
		147.2	98.542	104.333
		148.8	98.488	104.042
		150.4	98.34	103.906
		152	97.97	104.504
		153.6	97.944	104.778
		155.2	98.893	104.324
		156.8	99.475	103.992
		158.4	99.97	103.623
		160	99.501	103.721
		161.6	99.275	104.849
		163.2	99.751	104.865
		164.8	99.816	104.618
		166.4	98.64	104.687
		168	99.222	105.388
		169.6	99.854	105.94
		171.2	100.147	106.437
		172.8	100.717	107.388
		174.4	100.327	108.388
		176	100.173	109.088
		177.6	101.836	110.246
		179.2	102.845	109.998
		180.8	103.92	108.483
		182.4	103.588	108.102
		184	102.43	108.129
		185.6	102.639	108.198
		187.2	102.767	109.471
		188.8	102.043	110.58
		190.4	102.711	112.061
		192	102.769	113.755
		193.6	102.482	113.451
		195.2	103.227	112.07
		196.8	104.272	109.884
		198.4	104.319	108.655
		200	104.548	108.964
		201.6	104.254	109.69
		203.2	103.796	110.506
		204.8	103.135	110.684
		206.4	103.545	110.513
		208	102.51	111.149
		209.6	102.081	110.948
		211.2	101.997	110.506
		212.8	103.137	111.01
		214.4	104.081	110.999
		216	105.234	111.655
		217.6	106.022	112.497
		219.2	106.114	112.764
		220.8	106.711	112.874
		222.4	107.638	113.592
		224	107.433	114.013
		225.6	107.195	113.914
		227.2	107.625	113.709
		228.8	106.796	113.458
		230.4	106.21	113.625
		232	106.323	114.531
		233.6	105.777	113.992
		235.2	104.682	114.306
		236.8	104.482	114.587
		238.4	105.884	114.058
		240	107.151	115.028
		241.6	109.038	115.927
		243.2	109.295	114.171
		244.8	108.001	113.124
		246.4	106.427	113.821
		248	105.223	113.573
		249.6	104.158	114.441
		251.2	104.347	113.941
		252.8	105.069	112.35
		254.4	106.74	111.563
		256	108.339	113.223
		257.6	109.278	114.722
		259.2	110.042	116.64
		260.8	110.052	116.603
		262.4	108.837	114.765
		264	108.045	113.513
		265.6	107.989	113.011
		267.2	109.139	113.621
		268.8	110.723	114.886
		270.4	112.237	115.899
		272	111.994	114.589
		273.6	111.249	113.716
		275.2	109.209	113.259
		276.8	109.532	113.462
		278.4	108.5	114.268
		280	108.928	116.12
		281.6	109.928	116.903
		283.2	110.887	117.297
		284.8	111.916	116.802
		286.4	112.855	115.416
		288	110.689	114.25
		289.6	109.524	114.099
		291.2	109.113	115.15
		292.8	109.434	115.37
		294.4	110.696	114.056
		296	111.431	114.034
		297.6	111.379	114.41
		299.2	111.89	114.834
		300.8	112.123	116.203
		302.4	111.859	115.7
		304	110.845	112.642
		305.6	109.647	111.003
		307.2	109.588	109.596
		308.8	109.711	110.611
		310.4	110.594	116.614
		312	111.957	126.904
		313.6	112.935	138.564
		315.2	113.408	151.798
		316.8	114.227	164.339
		318.4	113.15	177.067
		320	111.499	192.105
		321.6	110.818	207.236
		323.2	110.548	220.208
		324.8	112.002	234.619
		326.4	112.61	247.264
		328	112.987	256.596
		329.6	113.007	267.139
		331.2	112.762	278.81
		332.8	112.879	290.71
		334.4	113.078	303.571
		336	112.864	312.838
		337.6	112.94	317.706
		339.2	111.999	323.259
		340.8	112.248	332.91
		342.4	113.672	339.114
		344	113.652	342.5
		345.6	114.287	348.23
		347.2	112.726	353.631
		348.8	109.853	358.224
		350.4	109.348	363.407
		352	109.955	361.882
		353.6	110.584	353.198
		355.2	112.773	350.699
		356.8	112.935	350.015
		358.4	113.083	350.753
		360	112.606	349.7
		361.6	111.816	348.522
		363.2	110.267	345.039
		364.8	109.717	346.132
		366.4	110.382	346.706
		368	110.695	343.815
		369.6	110.911	339.261
		371.2	111.239	336.425
		372.8	111.339	335.552
		374.4	111.401	337.928
		376	112.092	337.9
		377.6	111.411	333.262
		379.2	110.837	327.66
		380.8	111.64	319.941
		382.4	113.846	312.587
		384	115.649	310.236
		385.6	115.551	306.426
		387.2	114.33	303.144
		388.8	112.213	299.788
		390.4	112.139	293.773
		392	112.957	288.824
		393.6	113.907	285.829
		395.2	113.745	282.455
		396.8	113.611	279.212
		398.4	113.135	275.584
		400	113.448	272.172
		401.6	113.179	271.437
		403.2	111.884	272.714
		404.8	110.888	272.375
		406.4	110.633	267.687
		408	110.803	262.809
		409.6	111.825	257.95
		411.2	112.781	251.967
		412.8	112.921	249.895
		414.4	112.795	248.393
		416	111.839	246.328
		417.6	111.281	242.396
		419.2	111.201	237.338
		420.8	111.853	233.816
		422.4	112.059	232.928
		424	113.374	233.032
		425.6	114.415	233.911
		427.2	115.137	231.307
		428.8	114.904	228.502
		430.4	114.801	229.591
		432	113.542	230.694
		433.6	114.474	227.956
		435.2	115.614	226.456
		436.8	116.849	223.38
		438.4	116.74	220.022
		440	116.505	219.381
		441.6	115.173	218.387
		443.2	114.41	216.726
		444.8	114.342	216.402
		446.4	114.48	215.888
		448	113.139	213.551
		449.6	113.657	210.226
		451.2	114.366	207.91
		452.8	114.527	206.834
		454.4	114.967	205.758
		456	114.571	206.236
		457.6	112.504	206.028
		459.2	112.93	203.031
		460.8	114.32	202.837
		462.4	114.599	200.559
		464	114.738	198.622
		465.6	115.278	198.538
		467.2	114.268	199.741
		468.8	114.455	198.623
		470.4	115.676	198.279
		472	116.266	196.369
		473.6	114.816	194.674
		475.2	113.212	193.385
		476.8	111.767	192.881
		478.4	111.697	190.852
		480	112.615	188.351
		481.6	113.052	187.277
		483.2	113.47	188.819
		484.8	114.348	189.533
		486.4	115.415	190.781
		488	116.83	191
		489.6	116.636	189.945
		491.2	114.731	187.823
		492.8	114.808	186.924
		494.4	114.782	185.331
		496	116.014	184.263
		497.6	117.447	184.3
		499.2	117.247	185.361
		500.8	116.889	184.712
		502.4	117.308	183.829
		504	116.326	182.482
		505.6	118.061	179.981
		507.2	117.989	179.207
		508.8	117.902	182.332
		510.4	118.651	186.476
		512	119.898	191.373
		513.6	121.6	196.877
		515.2	124.151	201.8
		516.8	125.017	207.87
		518.4	127.026	216.101
		520	128.573	225.894
		521.6	131.352	235.569
		523.2	134.166	246.06
		524.8	135.934	255.268
		526.4	139.183	263.534
		528	142.412	274.229
		529.6	144.409	285.814
		531.2	147.326	299.808
		532.8	148.893	312.793
		534.4	151.103	323.401
		536	154.55	333.98
		537.6	159.612	346.467
		539.2	164.694	352.735
		540.8	168.489	365.002
		542.4	171.14	379.928
		544	173.117	397.926
		545.6	174.672	416.405
		547.2	177.743	431.786
		548.8	181.683	437.344
		550.4	185.764	449.7
		552	188.855	464.563
		553.6	192.481	482.16
		555.2	194.967	506.44
		556.8	195.262	525.224
		558.4	196.828	536.703
		560	199.489	550.229
		561.6	202.748	566.217
		563.2	207.905	569.33
		564.8	211.074	580.281
		566.4	213.072	580.785
		568	214.792	569.633
		569.6	214.856	562.884
		571.2	215.919	576.617
		572.8	216.241	581.525
		574.4	216.396	590.298
		576	222.789	597.715
		577.6	228.044	602.257
		579.2	230.845	616.104
		580.8	231.708	636.208
		582.4	232.716	642.992
		584	232.692	639.214
		585.6	237.55	628.221
		587.2	239.112	611.659
		588.8	241.053	605.636
		590.4	242.052	610.768
		592	242.492	602.853
		593.6	246.04	600.85
		595.2	244.491	597.48
		596.8	238.025	583.627
		598.4	236.796	585.774
		600	239.519	595.13
		601.6	241.79	588.933
		603.2	249.561	591.035
		604.8	253.363	589.418
		606.4	251.602	579.399
		608	251.36	569.925
		609.6	251.656	557.913
		611.2	249.657	545.672
		612.8	248.746	543.282
		614.4	248.657	540.424
		616	250.201	539.816
		617.6	253.072	537.792
		619.2	255.301	536.89
		620.8	255.93	528.849
		622.4	256.415	521.892
		624	255.519	512.451
		625.6	254.144	501.607
		627.2	252.46	492.619
		628.8	251.379	488.498
		630.4	251.855	482.084
		632	253.842	475.378
		633.6	256.415	466.704
		635.2	255.904	463.353
		636.8	254.484	463.27
		638.4	253.036	466.923
		640	251.172	469.815
		641.6	250.595	468.002
		643.2	252.913	461.35
		644.8	252.071	456.571
		646.4	250.827	446.913
		648	250.84	439.212
		649.6	251.644	432.557
		651.2	253.412	429.272
		652.8	256.066	429.025
		654.4	256.189	420.464
		656	255.706	411.814
		657.6	254.596	410.238
		659.2	255.714	406.262
		660.8	254.544	401.714
		662.4	248.454	395.744
		664	243.218	384.048
		665.6	242.881	375.282
		667.2	243.209	376.381
		668.8	246.17	377.301
		670.4	252.185	377.014
		672	253.524	375.899
		673.6	252.964	371.205
		675.2	252.801	362.041
		676.8	250.139	358.794
		678.4	244.488	353.269
		680	245.23	349.273
		681.6	247.105	345.549
		683.2	246.928	343.384
		684.8	246.021	338.672
		686.4	246.071	337.872
		688	245.386	333.319
		689.6	247.06	329.989
		691.2	249.136	325.013
		692.8	247.348	320.283
		694.4	245.085	319.033
		696	243.031	320.773
		697.6	242.368	318.844
		699.2	238.904	317.227
		700.8	237.336	313.033
		702.4	237.841	306.01
		704	239.845	302.846
		705.6	240.336	299.855
		707.2	238.954	296.293
		708.8	235.637	292.962
		710.4	236.692	291.121
		712	239.569	291.717
		713.6	242.759	291.37
		715.2	242.049	289.243
		716.8	236.636	287.803
		718.4	231.002	284.301
		720	229.211	279.923
		721.6	230.295	278.555
		723.2	229.645	278.369
		724.8	230.664	278.031
		726.4	229.95	278.461
		728	227.837	277.101
		729.6	228.415	274.156
		731.2	228.367	272.487
		732.8	224.783	271.572
		734.4	225.993	269.551
		736	225.398	266.628
		737.6	222.949	267.174
		739.2	223.093	267.173
		740.8	222.756	267.482
		742.4	222.128	265.781
		744	224.47	262.339
		745.6	225.532	258.34
		747.2	222.359	257.762
		748.8	219.25
		750.4	217.531
		752	219.499
		753.6	221.55
		755.2
		756.8
		758.4

## Sheet: Figure 1I
	Time(s)	ThapAfter2+Ca	NoThap afterCa
	0	51.851	63.938					No TG					with TG
	1.6	51.579	62.747					1.29679	1.4	0.65	0.7		2.78313	2.39667	4.01417
	3.2	51.502	62.806
	4.8	51.599	62.609
	6.4	52.235	62.22
	8	53.129	61.847
	9.6	53.83	61.081
	11.2	53.925	60.067
	12.8	54.368	59.902
	14.4	54.344	59.263
	16	54.023	58.841
	17.6	54.234	58.326
	19.2	54.579	57.858
	20.8	54.718	56.909
	22.4	55.197	57.031
	24	55.53	56.967
	25.6	55.746	56.733
	27.2	55.932	56.195
	28.8	55.872	56.214
	30.4	55.938	55.741
	32	56.304	55.607
	33.6	56.508	55.245
	35.2	57.117	54.087
	36.8	57.338	53.903
	38.4	57.299	54.255
	40	57.369	54.293
	41.6	57.696	53.984
	43.2	58.17	53.991
	44.8	58.934	53.282
	46.4	59.345	53.306
	48	59.319	52.683
	49.6	58.974	52.364
	51.2	58.684	51.616
	52.8	59.079	51.471
	54.4	59.806	51.456
	56	60.579	51.539
	57.6	60.834	51.561
	59.2	61.192	51.539
	60.8	61.231	51.236
	62.4	61.548	50.63
	64	62.01	50.737
	65.6	62.74	50.984
	67.2	62.954	51.121
	68.8	63.275	51.479
	70.4	63.375	51.484
	72	63.455	50.936
	73.6	63.619	50.919
	75.2	63.88	50.987
	76.8	63.855	50.778
	78.4	63.887	51.429
	80	64.691	51.746
	81.6	64.83	52.279
	83.2	65.538	53.148
	84.8	65.804	53.706
	86.4	65.475	52.98
	88	65.168	52.422
	89.6	65.717	51.65
	91.2	65.356	51.488
	92.8	65.834	51.402
	94.4	66.307	51.785
	96	66.247	52.152
	97.6	66.35	52.656
	99.2	66.588	52.847
	100.8	66.435	53.432
	102.4	66.697	53.494
	104	67.038	54.015
	105.6	66.942	54.937
	107.2	67.116	54.997
	108.8	67.386	54.82
	110.4	68.097	55.002
	112	68.761	54.632
	113.6	69.135	54.795
	115.2	68.554	54.694
	116.8	68.189	54.593
	118.4	69.598	56.922
	120	73.689	61.093
	121.6	79.174	66.599
	123.2	84.56	72.185
	124.8	87.606	75.48
	126.4	88.681	76.795
	128	89.759	77.397
	129.6	91.183	77.362
	131.2	93.018	78.869
	132.8	94.2	79.898
	134.4	94.571	80.73
	136	94.821	81.603
	137.6	95.056	82.013
	139.2	95.541	82.936
	140.8	96	84.145
	142.4	96.233	84.637
	144	96.51	84.33
	145.6	97.054	83.622
	147.2	97.306	83.91
	148.8	97.878	85.147
	150.4	98.004	85.942
	152	98.037	86.154
	153.6	96.819	86.422
	155.2	97.128	86.464
	156.8	97.229	87.528
	158.4	96.983	88.673
	160	96.587	89.234
	161.6	96.671	89.705
	163.2	97.029	89.9
	164.8	97.588	89.126
	166.4	97.569	88.769
	168	97.147	89.332
	169.6	97.012	90.377
	171.2	97.347	91.397
	172.8	97.302	92.367
	174.4	97.199	92.083
	176	96.628	91.639
	177.6	96.431	91.382
	179.2	96.646	91.614
	180.8	96.951	91.432
	182.4	97.08	92.683
	184	97.507	93.393
	185.6	97.614	93.841
	187.2	97.903	92.882
	188.8	97.023	91.97
	190.4	96.645	91.305
	192	96.509	91.686
	193.6	96.845	92.9
	195.2	97.236	94.399
	196.8	97.374	95.884
	198.4	96.958	96.749
	200	96.716	96.625
	201.6	96.623	96.191
	203.2	96.55	95.781
	204.8	96.406	94.929
	206.4	95.757	95.164
	208	95.951	94.832
	209.6	96.379	94.989
	211.2	96.891	95.893
	212.8	97.213	96.727
	214.4	97.366	97.116
	216	96.815	97.959
	217.6	96.613	98.287
	219.2	96.276	99.016
	220.8	95.779	100.037
	222.4	95.329	100.409
	224	95.337	100.275
	225.6	95.829	100.422
	227.2	96.445	100.221
	228.8	96.819	99.792
	230.4	96.631	99.689
	232	96.772	99.587
	233.6	96.476	100.048
	235.2	96.181	101.342
	236.8	96.017	101.781
	238.4	95.806	102.406
	240	95.897	102.544
	241.6	95.819	102.278
	243.2	95.189	102.376
	244.8	94.621	103.18
	246.4	94.957	103.558
	248	95.474	104.333
	249.6	96.449	104.899
	251.2	96.372	105.907
	252.8	95.952	105.969
	254.4	95.513	105.848
	256	96.046	105.83
	257.6	95.837	105.45
	259.2	94.814	105.3
	260.8	94.017	105.706
	262.4	93.846	105.864
	264	94.346	105.971
	265.6	96.007	106.097
	267.2	96.501	105.572
	268.8	96.803	105.037
	270.4	96.867	104.689
	272	96.897	105.625
	273.6	96.656	106.288
	275.2	96.469	107.967
	276.8	95.416	107.854
	278.4	95.128	107.574
	280	95.536	106.986
	281.6	95.915	107.183
	283.2	96.074	107.568
	284.8	96.71	109.165
	286.4	96.86	109.08
	288	96.652	109.416
	289.6	96.742	109.474
	291.2	96.505	109.816
	292.8	95.37	109.61
	294.4	95.724	109.338
	296	96.328	109.148
	297.6	96.546	109.389
	299.2	97.022	109.986
	300.8	97.502	110.251
	302.4	97.075	110.257
	304	97.145	109.612
	305.6	97.064	109.222
	307.2	96.937	109.15
	308.8	96.582	109.449
	310.4	96.226	109.91
	312	95.936	110.871
	313.6	95.729	110.928
	315.2	95.984	110.71
	316.8	96.66	111.962
	318.4	96.083	112.401
	320	95.597	112.749
	321.6	94.786	113.554
	323.2	95.093	113.538
	324.8	96.898	112.816
	326.4	99.98	113.434
	328	95.154	112.907
	329.6	103.102	112.204
	331.2	111.743	112.135
	332.8	121.164	111.833
	334.4	130.715	112.032
	336	140.965	111.906
	337.6	151.372	112.428
	339.2	162.564	112.367
	340.8	173.959	112.191
	342.4	186.148	112.072
	344	198.949	111.934
	345.6	212.682	111.044
	347.2	226.086	111.463
	348.8	238.374	111.935
	350.4	248.906	112.376
	352	259.636	112.055
	353.6	270.299	112.687
	355.2	280.01	114.102
	356.8	289.681	114.664
	358.4	299.986	115.316
	360	309.592	114.616
	361.6	320.101	112.589
	363.2	329.435	112.736
	364.8	337.006	113.671
	366.4	343.233	114.085
	368	347.95	114.704
	369.6	351.361	115.187
	371.2	354.824	115.208
	372.8	358.106	116.367
	374.4	362.76	115.954
	376	366.305	114.772
	377.6	367.378	113.805
	379.2	365.137	113.601
	380.8	364.256	113.773
	382.4	364.228	114.517
	384	367.074	114.269
	385.6	370.451	114.051
	387.2	373.061	114.185
	388.8	371.508	114.786
	390.4	370.486	114.881
	392	366.746	114.553
	393.6	362.466	113.896
	395.2	358.147	113.709
	396.8	355.419	113.772
	398.4	352.761	114.242
	400	350.904	115.297
	401.6	349.555	115.453
	403.2	347.656	114.76
	404.8	345.525	114.801
	406.4	342.081	115.145
	408	339.333	115.846
	409.6	336.861	116.826
	411.2	333.163	116.967
	412.8	327.753	116.421
	414.4	323.867	116.701
	416	319.883	116.433
	417.6	318.291	116.318
	419.2	314.979	116.535
	420.8	310.455	117.438
	422.4	303.996	118.83
	424	299.342	118.768
	425.6	296.021	117.786
	427.2	292.1	116.966
	428.8	287.824	117.046
	430.4	284.345	117.515
	432	278.728	119.623
	433.6	273.502	120.071
	435.2	268.166	118.312
	436.8	262.669	117.525
	438.4	259.395	117.32
	440	253.374	115.901
	441.6	248.052	116.459
	443.2	242.797	116.911
	444.8	240.069	115.592
	446.4	237.599	115.477
	448	234.007	115.286
	449.6	227.615	114.92
	451.2	222.474	115.588
	452.8	217.343	116.319
	454.4	216.307	117.448
	456	214.329	117.687
	457.6	211.59	118.455
	459.2	206.901	120.801
	460.8	202.269	121.828
	462.4	197.513	121.896
	464	193.858	121.686
	465.6	191.011	120.19
	467.2	188.751	119.327
	468.8	185.402	118.37
	470.4	182.741	117.679
	472	179.884	117.471
	473.6	176.575	117.679
	475.2	174.281	118.055
	476.8	172.348	118.281
	478.4	170.012	118.269
	480	168.52	118.554
	481.6	167.37	119.496
	483.2	165.762	119.753
	484.8	163.336	119.918
	486.4	160.333	120.526
	488	156.899	120.84
	489.6	155.219	121.42
	491.2	153.98	122.837
	492.8	153.346	121.727
	494.4	151.748	120.834
	496	150.372	120.141
	497.6	149.395	119.57
	499.2	148.775	119.639
	500.8	148.288	120.31
	502.4	146.497	119.848
	504	143.798	119.945
	505.6	141.866	119.621
	507.2	140.165	119.606
	508.8	139.254	118.834
	510.4	138.801	119.691
	512	137.348	120.989
	513.6	136.412	120.995
	515.2	134.731	121.341
	516.8	134.906	121.265
	518.4	140.899	121.019
	520	152.363	122.066
	521.6	167.397	123.211
	523.2	185.238	123.194
	524.8	197.518	124.184
	526.4	204.129	122.798
	528	208.168	120.657
	529.6	210.107	119.715
	531.2	211.316	121.388
	532.8	214.044	122.765
	534.4	216.268	124.244
	536	218.545	125.359
	537.6	218.271	125.982
	539.2	216.805	126.396
	540.8	215.378	127.276
	542.4	212.085	127.54
	544	210.448	128.508
	545.6	210.325	129.365
	547.2	209.617	130.024
	548.8	208.356	131.102
	550.4	208.428	132.665
	552	206.082	132.997
	553.6	204.739	133.034
	555.2	204.98	132.785
	556.8	206.034	132.161
	558.4	203.789	133.806
	560	202.114	135.258
	561.6	200.029	136.156
	563.2	197.532	137.548
	564.8	196.742	138.825
	566.4	196.669	138.658
	568	195.466	139.867
	569.6	193.462	140.391
	571.2	193.327	140.477
	572.8	191.809	140.861
	574.4	191.584	142.539
	576	190.293	142.807
	577.6	191.009	144.386
	579.2	190.654	145.743
	580.8	190.033	143.448
	582.4	188.106	141.831
	584	188.296	143.444
	585.6	187.266	143.551
	587.2	188.125	145.586
	588.8	188.395	145.686
	590.4	186.334	144.428
	592	183.47	143.931
	593.6	181.819	145.843
	595.2	181.5	146.566
	596.8	181.306	146.462
	598.4	181.574	144.816
	600	183.043	145.501
	601.6	183.396	145.938
	603.2	184.277	148.082
	604.8	185.127	149.552
	606.4	184.322	149.186
	608	183.294	146.896
	609.6	183.929	146.296
	611.2	183.921	145.187
	612.8	183.888	146.297
	614.4	183.537	147.282
	616	183.741	148.314
	617.6	183.077	147.783
	619.2	182.28	148.912
	620.8	181.88	149.582
	622.4	181.506	150.859
	624	181.547	151.846
	625.6	183.538	151.189
	627.2	183.996	149.902
	628.8	182.491	149.106
	630.4	181.21	149.99
	632	179.781	150.63
	633.6	178.737	152.986
	635.2	179.791	152.495
	636.8	180.702	151.262
	638.4	181.49	150.273
	640	183.514	150.362
	641.6	184.585	150.477
	643.2	185.351	152.603
	644.8	185.95	154.513
	646.4	186.029	155.784
	648	185.996	156.113
	649.6	187.042	154.665
	651.2	186.369	152.825
	652.8	184.652	151.749
	654.4	183.257	151.111
	656	183.176	151.827
	657.6	183.406	152.282
	659.2	185.061	151.68
	660.8	186.374	151.324
	662.4	186.17	151.664
	664	185.501	151.647
	665.6	184.876	153.085
	667.2	184.356	152.825
	668.8	183.848	152.479
	670.4	185.34	152.319
	672	185.828	152.427
	673.6	185.652	153.099
	675.2	185.51	155.048
	676.8	187.164	155.007
	678.4	188.059	155.776
	680	188.045	156.094
	681.6	188.307	155.415
	683.2	188.584	155.961
	684.8	187.972	156.556
	686.4	188.107	154.551
	688	187.889	152.525
	689.6	186.473	151.162
	691.2	187.19	150.477
	692.8	189.161	151.884
	694.4	189.878	152.347
	696	189.709	151.889
	697.6	189.184	152.337
	699.2	188.979	153.862
	700.8	189.185	154.118
	702.4	189.709	155.3
	704	191.699	155.908
	705.6	192.308	154.802
	707.2	191.371	153.562
	708.8	191.784	152.386
	710.4	192.079	151.482
	712	191.348	153.547
	713.6	192.25	156.759
	715.2	193.038	157.792
	716.8	192.595	158.108
	718.4	193.762	158.016
	720	194.643	156.565
	721.6	195.462	155.148
	723.2	196.579	153.197
	724.8	196.983	152.453
	726.4	196.663	153.393
	728	195.969	156.237
	729.6	194.698	157.804
	731.2	194.499	159.117
	732.8	195.002	158.134
	734.4	197.035	157.619
	736		157.565
	737.6		158.307
	739.2
	740.8
	742.4
	744
	745.6
	747.2
	748.8
	750.4
	752
	753.6
	755.2
	756.8
	758.4

## Sheet: Figure 1J
		TG-GPN	GPN
	0	39.084	67.489				- TG				+ TG
	1.6	38.885	68.399				1.43395	0.900766	0.58912		1.70774	2.14031	2.36759
	3.2	39.536	69.197
	4.8	40.508	67.474
	6.4	41.501	65.092
	8	41.707	63.734
	9.6	41.811	63.432
	11.2	41.421	62.473
	12.8	40.908	61.547
	14.4	41.263	60.512
	16	41.815	59.381
	17.6	42.084	59.497
	19.2	42.378	59.954
	20.8	41.939	60.911
	22.4	41.775	60.963
	24	42.08	61.053
	25.6	42.518	60.533
	27.2	42.64	59.143
	28.8	42.666	57.764
	30.4	42.512	57.282
	32	42.321	56.556
	33.6	42.082	56.766
	35.2	42.175	57.395
	36.8	42.318	56.926
	38.4	42.507	56.344
	40	42.698	55.595
	41.6	42.821	55.144
	43.2	42.883	55.025
	44.8	43.538	55.895
	46.4	43.821	54.723
	48	43.821	53.102
	49.6	43.752	52.019
	51.2	43.573	51.907
	52.8	43.249	52.67
	54.4	42.998	54.778
	56	43.045	54.368
	57.6	43.252	53.131
	59.2	43.917	52.309
	60.8	44.53	51.861
	62.4	44.611	52.076
	64	43.856	52.654
	65.6	43.945	52.624
	67.2	43.759	51.822
	68.8	43.707	51.523
	70.4	44.54	52.536
	72	44.989	53.156
	73.6	44.779	53.611
	75.2	44.798	53.311
	76.8	44.647	51.48
	78.4	45.045	50.703
	80	45.956	51.127
	81.6	46.258	51.17
	83.2	45.942	51.104
	84.8	45.585	50.854
	86.4	45.387	50.311
	88	45.637	50.368
	89.6	46.019	49.558
	91.2	46.239	49.958
	92.8	46.312	50.196
	94.4	46.248	50.925
	96	45.897	52.16
	97.6	45.083	52.304
	99.2	45.533	51.538
	100.8	45.755	51.196
	102.4	45.696	50.751
	104	45.656	51.172
	105.6	45.618	52.22
	107.2	45.557	53.04
	108.8	46.899	53.192
	110.4	47.555	52.666
	112	47.238	52.154
	113.6	46.647	52.49
	115.2	46.074	52.659
	116.8	45.844	52.883
	118.4	46.567	51.475
	120	47.659	50.602
	121.6	49.178	50.804
	123.2	50.488	51.568
	124.8	51.804	53.12
	126.4	54.015	53.669
	128	56.308	52.729
	129.6	58.723	51.887
	131.2	61.878	51.268
	132.8	64.219	51.018
	134.4	66.103	51.993
	136	68.678	51.959
	137.6	71.375	51.576
	139.2	74.004	51.869
	140.8	77.238	52.295
	142.4	79.094	52.377
	144	80.645	52.576
	145.6	82.497	52.513
	147.2	86.071	52.171
	148.8	89.588	52.668
	150.4	93.547	53.237
	152	95.744	53.024
	153.6	97.925	52.738
	155.2	100.753	52.954
	156.8	105.006	53.662
	158.4	107.814	53.988
	160	109.896	53.225
	161.6	111.102	52.894
	163.2	112.552	52.388
	164.8	113.683	52.966
	166.4	117.158	54.536
	168	119.565	54.778
	169.6	120.873	53.377
	171.2	122.185	52.951
	172.8	124.179	52.283
	174.4	125.727	52.174
	176	127.495	53.315
	177.6	130.144	54.358
	179.2	131.941	54.651
	180.8	133.065	55.767
	182.4	134.73	55.625
	184	137.013	55.29
	185.6	136.95	55.857
	187.2	138.724	55.892
	188.8	139.214	55.701
	190.4	138.231	55.13
	192	138.985	53.368
	193.6	140.231	52.518
	195.2	141.194	53.395
	196.8	143.14	54.566
	198.4	144.033	55.922
	200	144.027	56.632
	201.6	144.894	56.723
	203.2	143.843	56.325
	204.8	142.759	56.862
	206.4	142.994	58.28
	208	142.238	57.936
	209.6	141.202	57.392
	211.2	141.987	58.103
	212.8	142.749	57.862
	214.4	143.612	57.69
	216	145.202	58.142
	217.6	145.319	57.882
	219.2	144.863	58.286
	220.8	145.275	60.137
	222.4	144.618	60.975
	224	143.285	60.109
	225.6	142.205	58.274
	227.2	142.134	57.331
	228.8	143.387	57.364
	230.4	144.29	58.438
	232	144.698	58.884
	233.6	144.398	59.717
	235.2	143.494	60.08
	236.8	142.867	60.154
	238.4	142.516	60.077
	240	141.801	59.681
	241.6	140.9	59.24
	243.2	140.065	58.78
	244.8	139.789	58.19
	246.4	140.118	57.879
	248	139.886	57.736
	249.6	140.817	58.527
	251.2	140.574	59.728
	252.8	139.371	62.156
	254.4	138.508	64.515
	256	137.599	65.186
	257.6	135.554	64.526
	259.2	134.985	62.829
	260.8	134.394	61.269
	262.4	133.468	61.892
	264	132.998	61.517
	265.6	132.504	61.256
	267.2	132.387	60.954
	268.8	133.563	60.31
	270.4	133.484	61.034
	272	132.498	61.207
	273.6	131.438	61.33
	275.2	130.21	62.275
	276.8	128.667	61.897
	278.4	127.366	62.045
	280	125.735	62.301
	281.6	125.722	62.367
	283.2	126.702	63.038
	284.8	126.518	63.742
	286.4	125.272	63.259
	288	124.412	63.726
	289.6	124.651	64.146
	291.2	125.595	63.919
	292.8	125.627	64.111
	294.4	124.765	64.098
	296	123.758	65.074
	297.6	122.879	65.109
	299.2	123.388	64.519
	300.8	123.103	64.532
	302.4	122.585	64.505
	304	122.323	64.375
	305.6	121.188	67.285
	307.2	120.237	68.272
	308.8	119.197	68.122
	310.4	119.088	69.362
	312	120.452	70.64
	313.6	123.4	72.981
	315.2	129.355	76.151
	316.8	136.863	77.56
	318.4	143.483	78.461
	320	149.466	78.818
	321.6	154.99	81.097
	323.2	159.184	83.236
	324.8	163.892	84.518
	326.4	166.766	86.147
	328	169.605	88.542
	329.6	174.057	89.813
	331.2	179.515	91.518
	332.8	185.959	92.54
	334.4	190.115	93.624
	336	192.464	96.28
	337.6	193.374	99.423
	339.2	197.714	100
	340.8	199.71	102.74
	342.4	202.704	105.257
	344	205.133	108.283
	345.6	207.11	110.323
	347.2	208.679	111.333
	348.8	211.62	109.617
	350.4	213.749	109.477
	352	214.756	109.642
	353.6	216.197	112.293
	355.2	220.142	114.243
	356.8	220.695	116.236
	358.4	219.459	116.308
	360	219.024	117.297
	361.6	219.647	119.992
	363.2	221.507	124.067
	364.8	227.311	124.869
	366.4	228.283	124.676
	368	226.56	122.169
	369.6	223.49	124.016
	371.2	223.781	126.917
	372.8	226.94	129.653
	374.4	228.482	129.61
	376	229.043	131.174
	377.6	230.431	132.089
	379.2	227.412	135.62
	380.8	222.98	138.418
	382.4	223.228	138.691
	384	223.914	138.19
	385.6	225.474	138.606
	387.2	230.039	140.24
	388.8	232.416	143.401
	390.4	231.931	145.412
	392	233.637	147.022
	393.6	235.22	147.442
	395.2	234.858	147.594
	396.8	235.249	149.287
	398.4	233.4	151.094
	400	232.602	153.066
	401.6	232.776	154.837
	403.2	232.659	157.37
	404.8	233.085	159.066
	406.4	234.82	158.921
	408	233.893	159.273
	409.6	236.965	158.224
	411.2	236.827	156.63
	412.8	234.786	158.839
	414.4	231.762	161.65
	416	231.319	162.82
	417.6	232.309	164.462
	419.2	237.849	165.111
	420.8	238.812	165.37
	422.4	238.497	165.402
	424	237.109	163.674
	425.6	238.166	163.458
	427.2	238.051	162.767
	428.8	239.617	163.103
	430.4	239.526	164.701
	432	237.572	166.151
	433.6	235.607	167.592
	435.2	234.549	169.636
	436.8	235.242	170.187
	438.4	237.211	170.357
	440	241.965	173.274
	441.6	244.741	177.334
	443.2	245.645	178.646
	444.8	242.653	177.055
	446.4	238.198	175.819
	448	234.356	175.051
	449.6	235.33	176.957
	451.2	238.105	181.142
	452.8	240.127	181.591
	454.4	240.979	181.457
	456	238.579	180.556
	457.6	237.717	181.781
	459.2	238.983	181.76
	460.8	240.802	181.725
	462.4	240.029	186.289
	464	241.438	191.161
	465.6	238.46	191.887
	467.2	233.482	191.144
	468.8	232.07	188.804
	470.4	234.248	184.666
	472	238.765	186.519
	473.6	244.711	188.484
	475.2	245.509	186.756
	476.8	242.096	182.383
	478.4	240.358	181.379
	480	240.262	180.888
	481.6	243.29	181.851
	483.2	243.649	184.995
	484.8	245.52	187.008
	486.4	245.536	188.607
	488	245.083	188.407
	489.6	243.016	188.951
	491.2	240.578	188.951
	492.8	238.491	190.219
	494.4	241.866	188.727
	496	247.759	187.38
	497.6	251.842	186.35
	499.2	253.033	187.256
	500.8	250.381	186.894
	502.4	245.325	189.341
	504	240.149	190.974
	505.6	239.409	191.896
	507.2	240.132	191.022
	508.8	242.514	190.437
	510.4	246.596	189.363
	512	247.266	191.1
	513.6	246.479	193.189
	515.2	247.068	193.312
	516.8	248.298	191.413
	518.4	244.202	190.89
	520	240.702	190.944
	521.6	238.722	192.021
	523.2	237.658	192.464
	524.8	240.987	192.284
	526.4	249.785	193.209
	528	253.046	193.301
	529.6	252.356	193.814
	531.2	245.493	193.389
	532.8	233.736	192.799
	534.4	226.696	192.943
	536	227.604	192.443
	537.6	233.716	192.407
	539.2	242.084	195.67
	540.8	247.297	197.244
	542.4	250.5	200.5
	544	254.8	197.603
	545.6	260.968	192.726
	547.2	265.75	189.326
	548.8	267.781	188.516
	550.4	274.321	190.087
	552	277.939	194.654
	553.6	283.36	194.962
	555.2	288.193	196.246
	556.8	283.919	196.732
	558.4	277.119	195.343
	560	277.599	194.534
	561.6	276.526	193.499
	563.2	277.926	194.751
	564.8	279.327	198.032
	566.4	276.287	201.304
	568	276.717	202.42
	569.6	277.238	201.511
	571.2	276.322	199.851
	572.8	277.422	198.002
	574.4	276.653	199.749
	576	273.468	202.402
	577.6	273.037	202.572
	579.2	272.787	201.897
	580.8	269.479	201.313
	582.4	268.051	199.966
	584	266.571	202.26
	585.6	265.434	202.136
	587.2	265.571	200.086
	588.8	268.845	198.981
	590.4	269.664	197.765
	592	273.079	197.891
	593.6	279.065	199.335
	595.2	278.021	198.403
	596.8	272.816	198.271
	598.4	271.661	197.824
	600	276.984	198.05
	601.6	280.753	197.703
	603.2	283.647	199.947
	604.8	280.833	200.458
	606.4	270.952	202.948
	608	266.895	206.131
	609.6	270.071	207.153
	611.2	267.788	205.05
	612.8	269.226	205.931
	614.4	275.002	204.501
	616	278.577	204.58
	617.6	281.716	206.445
	619.2	285.287	204.686
	620.8	283.23	203.047
	622.4	280.58	203.808
	624	276.187	204.227
	625.6	275.557	206.272
	627.2	277.677	207.135
	628.8	280.155	207.368
	630.4	280.577	207.89
	632	280.298	209.417
	633.6	273.794	207.463
	635.2	273.78	204.159
	636.8	281.244	202.002
	638.4	285.185	199.797
	640	287.726	199.757
	641.6	290.558	204.099
	643.2	284.541	207.285
	644.8	283.388	206.671
	646.4	282.326	207.403
	648	281.941	205.855
	649.6	282.095	205.537
	651.2	285.573	205.669
	652.8	288.357	205.818
	654.4	295.633	204.07
	656	290.973	203.492
	657.6	285.246	202.73
	659.2	278.701	201.488
	660.8	276.708	199.485
	662.4	275.877	199.117
	664	285.648	201.365
	665.6	287.306	204.839
	667.2	289.191	203.092
	668.8	289.529	202.146
	670.4	289.211	202.019
	672	287.885	205.374
	673.6	291.441	209.982
	675.2	291.871	211.979
	676.8	294.305	210.262
	678.4	292.046	208.918
	680	291.742	216.192
	681.6	292.371	230.891
	683.2	287.773	177.806
	684.8	288.658
	686.4	287.21
	688	283.859
	689.6	289.415
	691.2	293.108
	692.8	292.328
	694.4	299.905
	696	301.691
	697.6	301.482
	699.2	302.091
	700.8	297.746
	702.4	291.056
	704	291.378
	705.6	292.307
	707.2	293.544
	708.8	295.049
	710.4	297.848
	712	299.352
	713.6	302.417
	715.2	300.782
	716.8	292.219
	718.4	291.405
	720	294.208
	721.6	298.602
	723.2	303.449
	724.8	303.809
	726.4	299.855
	728	300.215
	729.6	301.856
	731.2	301.716
	732.8	300.687
	734.4	296.026
	736	292.644
	737.6	301.199
	739.2
	740.8
	742.4
	744
	745.6
	747.2
	748.8
	750.4
	752
	753.6
	755.2
	756.8
	758.4
	760
	761.6
	763.2
	764.8
	766.4
	768
	769.6
	771.2
	772.8
	774.4
	776
	777.6
	779.2
	780.8
	782.4
	784
	785.6
	787.2
	788.8
	790.4
	792
	793.6
	795.2
	796.8
	798.4
	800
	801.6
	803.2
	804.8
	806.4
	808
	809.6
	811.2
	812.8
	814.4
	816
	817.6
	819.2
	820.8
	822.4
	824
	825.6

## Sheet: Figure 1K
			Nig	TG-Nig
		0	65.667	61.161				- TG				+ TG
		1.6	64.535	61.048				1.48841	0.96955	1.149		1.87772	2.5597	2.96091
		3.2	64.184	60.382
		4.8	64.381	59.87
		6.4	64.272	59.979
		8	64.424	59.857
		9.6	63.99	59.076
		11.2	64.966	58.929
		12.8	65.853	58.934
		14.4	66.646	58.206
		16	66.586	57.686
		17.6	66.564	57.222
		19.2	66.174	56.627
		20.8	66.073	55.935
		22.4	65.719	55.983
		24	65.879	56.098
		25.6	66.945	56.469
		27.2	68.44	56.813
		28.8	69.452	57.605
		30.4	70.092	57.318
		32	70.785	56.566
		33.6	70.41	55.829
		35.2	70.52	54.764
		36.8	70.336	54.065
		38.4	69.634	54.232
		40	69.601	54.232
		41.6	70.187	54.27
		43.2	70.266	54.102
		44.8	71.668	53.216
		46.4	72.406	53.164
		48	72.356	52.625
		49.6	71.61	52.507
		51.2	70.934	52.351
		52.8	70.932	52.1
		54.4	72.049	51.596
		56	73.402	51.577
		57.6	73.771	51.796
		59.2	72.841	51.966
		60.8	72.347	51.236
		62.4	71.891	50.929
		64	71.945	50.398
		65.6	72.845	50.292
		67.2	73.672	50.919
		68.8	73.966	51.083
		70.4	74.543	50.544
		72	73.973	50.651
		73.6	73.404	50.316
		75.2	73.359	50.218
		76.8	74.027	50.698
		78.4	73.95	50.229
		80	74.341	49.345
		81.6	74.236	49.148
		83.2	73.889	48.874
		84.8	73.737	49.126
		86.4	74.671	49.965
		88	74.173	49.923
		89.6	74.306	49.032
		91.2	74.94	48.442
		92.8	75.14	47.654
		94.4	74.899	47.921
		96	75.954	48.551
		97.6	75.152	49.125
		99.2	74.898	49.221
		100.8	74.914	48.751
		102.4	74.721	48.309
		104	74.346	48.179
		105.6	74.763	48.485
		107.2	74.682	48.419
		108.8	74.87	49.581
		110.4	75.026	50.683
		112	75.064	52.108
		113.6	74.848	54.283
		115.2	75.357	56.634
		116.8	76.354	58.443
		118.4	75.788	60.373
		120	75.795	61.814
		121.6	75.215	62.521
		123.2	74.409	64.267
		124.8	74.402	66.128
		126.4	75.021	68.556
		128	75.106	70.514
		129.6	76.372	73.175
		131.2	76.87	75.487
		132.8	77.521	78.111
		134.4	76.902	80.725
		136	75.688	82.832
		137.6	75.038	84.204
		139.2	74.795	85.437
		140.8	74.809	86.528
		142.4	74.423	87.634
		144	73.978	89.053
		145.6	73.797	90.755
		147.2	74.227	92.255
		148.8	75.545	94.127
		150.4	77.129	96.256
		152	77.625	97.051
		153.6	76.871	98.132
		155.2	75.949	99.521
		156.8	74.873	99.885
		158.4	75.248	101.364
		160	75.765	102.642
		161.6	76.014	102.111
		163.2	75.253	102.366
		164.8	74.929	104.306
		166.4	75.815	106.678
		168	77.052	108.835
		169.6	76.75	110.671
		171.2	76.199	111.213
		172.8	75.4	111.98
		174.4	74.584	113.178
		176	75.074	113.038
		177.6	76.45	112.241
		179.2	76.097	112.979
		180.8	75.324	113.848
		182.4	74.853	114.652
		184	74.469	115.125
		185.6	73.986	114.189
		187.2	75.065	114.645
		188.8	75.305	116.759
		190.4	74.782	119.575
		192	74.793	120.924
		193.6	74.437	121.083
		195.2	73.185	118.768
		196.8	73.593	116.812
		198.4	74.154	115.581
		200	75.119	116.147
		201.6	76.009	117.607
		203.2	76.434	118.629
		204.8	75.655	118.963
		206.4	75.528	119.781
		208	74.35	119.703
		209.6	73.102	119.314
		211.2	73.545	117.946
		212.8	74.25	117.178
		214.4	74.52	117.094
		216	75.206	118.338
		217.6	75.334	118.324
		219.2	74.546	117.647
		220.8	74.633	115.878
		222.4	74.026	116.936
		224	73.462	118.243
		225.6	74.484	119.488
		227.2	75.358	118.391
		228.8	76.339	116.592
		230.4	75.75	114.977
		232	74.83	115.204
		233.6	73.28	116.385
		235.2	72.741	117.416
		236.8	72.445	117.562
		238.4	73.042	117.585
		240	73.87	117.67
		241.6	75.415	116.42
		243.2	76.481	114.997
		244.8	76.684	113.758
		246.4	76.103	112.288
		248	75.019	111.397
		249.6	73.692	111.882
		251.2	73.583	111.257
		252.8	74.299	110.866
		254.4	74.923	111.328
		256	74.933	111.818
		257.6	74.28	112.994
		259.2	73.018	114.594
		260.8	73.275	114.438
		262.4	73.594	113.282
		264	74.299	112.19
		265.6	74.414	111.159
		267.2	73.711	109.757
		268.8	74.336	107.91
		270.4	75.528	105.889
		272	76.012	105.264
		273.6	76.438	105.668
		275.2	76.272	107.629
		276.8	75.428	109.275
		278.4	75.846	109.719
		280	75.131	108.72
		281.6	74.056	107.021
		283.2	73.88	105.341
		284.8	74.337	103.505
		286.4	74.289	101.999
		288	74.95	101.778
		289.6	73.982	101.162
		291.2	73.48	100.486
		292.8	73.217	100.545
		294.4	74.055	100.244
		296	74.932	99.999
		297.6	77.442	100.662
		299.2	80.887	100.022
		300.8	85.826	97.857
		302.4	88.837	96.999
		304	92.275	103.491
		305.6	94.879	117.969
		307.2	98.325	140.43
		308.8	102.215	165.87
		310.4	105.669	185.474
		312	105.546	193.056
		313.6	107.12	196.943
		315.2	109.025	198.44
		316.8	112.227	199.77
		318.4	115.665	203.089
		320	117.162	207.65
		321.6	115.486	210.252
		323.2	116.608	213.219
		324.8	118.937	214.759
		326.4	121.264	214.001
		328	123.615	211.656
		329.6	123.847	211.315
		331.2	121.122	212.672
		332.8	120.415	215.39
		334.4	120.862	218.49
		336	121.107	219.244
		337.6	120.856	216.947
		339.2	121.983	217.929
		340.8	121.059	222.074
		342.4	121.87	225.314
		344	122.442	226.704
		345.6	121.9	226.915
		347.2	120.679	224.998
		348.8	120.146	223.846
		350.4	118.591	225.692
		352	118.24	226.536
		353.6	119.524	224.933
		355.2	120.5	224.292
		356.8	120.518	224.855
		358.4	120.498	225.165
		360	120.17	224.989
		361.6	120.361	225.491
		363.2	122.26	224.647
		364.8	123.177	221.748
		366.4	123.54	220.154
		368	123.692	218.508
		369.6	122.793	220.584
		371.2	121.947	223.202
		372.8	119.971	223.138
		374.4	117.965	221.548
		376	117.822	221.815
		377.6	118.381	221.114
		379.2	119.632	223.495
		380.8	120.118	222.025
		382.4	118.301	221.122
		384	117.178	223.078
		385.6	116.704	225.666
		387.2	117.341	226.413
		388.8	118.372	225.329
		390.4	117.805	222.482
		392	117.258	222.611
		393.6	118.711	223.639
		395.2	119.299	226.171
		396.8	118.677	226.827
		398.4	117.621	225.098
		400	117.357	223.667
		401.6	117.999	222.728
		403.2	118.426	222.98
		404.8	118.741	224.852
		406.4	117.164	223.91
		408	115.425	223.107
		409.6	116.862	220.419
		411.2	118.12	219.473
		412.8	118.258	221.596
		414.4	118.691	223.472
		416	118.116	225.641
		417.6	115.756	228.68
		419.2	114.242	226.704
		420.8	113.444	223.792
		422.4	113.994	221.536
		424	115.108	219.538
		425.6	116.169	220.36
		427.2	116.33	221.582
		428.8	114.817	219.328
		430.4	113.752	220.487
		432	113.819	219.988
		433.6	113.689	220.244
		435.2	114.267	221.463
		436.8	114.494	223.35
		438.4	115.035	220.403
		440	115.331	223.284
		441.6	116.96	223.307
		443.2	117.449	225.479
		444.8	118.674	225.068
		446.4	117.162	224.258
		448	118.341	219.814
		449.6	118.367	218.536
		451.2	119.836	219.395
		452.8	119.223	221.859
		454.4	119.3	222.756
		456	117.172	222.667
		457.6	117.461	221.019
		459.2	116.916	222.635
		460.8	117.272	224.479
		462.4	116.846	223.611
		464	116.937	223.087
		465.6	117.513	220.873
		467.2	118.727	218.363
		468.8	117.59	218.075
		470.4	116.386	218.707
		472	116.025	220.039
		473.6	116.15	221.872
		475.2	117.03	222.335
		476.8	118.868	220.948
		478.4	118.228	218.407
		480	119.486	219.09
		481.6	120.783	220.077
		483.2	120.027	222.474
		484.8	118.732	223.857
		486.4	118.64	222.115
		488	117.362	219.31
		489.6	118.647	217.419
		491.2	119.464	217.784
		492.8	118.582	218.313
		494.4	117.695	219.942
		496	117.761	220.448
		497.6	117.925	219.782
		499.2	117.547	220.026
		500.8	116.469	219.513
		502.4	116.819	217.151
		504	115.736	217.949
		505.6	116.629	217.102
		507.2	117.001	219.618
		508.8	116.213	220.994
		510.4	115.429	221.519
		512	116.671	221.368
		513.6	115.995	222.489
		515.2	115.53	220.647
		516.8	114.188
		518.4	114.534
		520	115.913
		521.6	118.101
		523.2	118.837
		524.8	119.043
		526.4	117.665
		528	119.078
		529.6	119.818
		531.2	120.523
		532.8	121.468
		534.4	122.048
		536	120.574
		537.6	119.363
		539.2	119.433
		540.8	120.188
		542.4	120.429
		544	121.181
		545.6	119.939
		547.2	118.673
		548.8	120.504
		550.4	124.271
		552	125.907
		553.6	126.899
		555.2	123.459
		556.8	120.58
		558.4	118.382
		560	117.642
		561.6	119.007
		563.2	119.747
		564.8	119.948
		566.4	120.722
		568	122.951
		569.6	123.936
		571.2	125.492
		572.8	125.328
		574.4	124.978
		576	124.019
		577.6	124.748
		579.2	124.296
		580.8	122.248
		582.4	121.541
		584	121.83
		585.6	124.172
		587.2	125.419
		588.8	126.195
		590.4	123.871
		592	122.841
		593.6	122.661
		595.2	123.783
		596.8	124.254
		598.4	124.746
		600	125.81
		601.6	127.61
		603.2	126.613
		604.8	124.492
		606.4	123.672
		608	124.123
		609.6	127.278
		611.2	132.599
		612.8
		614.4
		616
		617.6
		619.2
		620.8
		622.4
		624
		625.6
		627.2
		628.8
		630.4
		632
		633.6
		635.2
		636.8
		638.4
		640
		641.6
		643.2
		644.8
		646.4
		648
		649.6
		651.2
		652.8
		654.4
		656
		657.6
		659.2
		660.8
		662.4
		664
		665.6
		667.2
		668.8
		670.4
		672
		673.6
		675.2
		676.8
		678.4
		680
		681.6
		683.2
		684.8
		686.4
		688
		689.6
		691.2
		692.8
		694.4
		696
		697.6
		699.2
		700.8
		702.4
		704
		705.6
		707.2
		708.8
		710.4
		712
		713.6
		715.2
		716.8
		718.4
		720
		721.6
		723.2
		724.8
		726.4
		728
		729.6
		731.2
		732.8
		734.4
		736
		737.6
		739.2
		740.8
		742.4
		744
		745.6
		747.2
		748.8
		750.4
		752
		753.6
		755.2
		756.8
		758.4
		760
		761.6
		763.2
		764.8
		766.4
		768
		769.6
		771.2
		772.8
		774.4
		776
		777.6
		779.2
		780.8
		782.4
		784
		785.6
		787.2
		788.8
		790.4
		792
		793.6
		795.2
		796.8
		798.4
		800
		801.6
		803.2
		804.8
		806.4
		808
		809.6
		811.2
		812.8
		814.4
		816
		817.6
		819.2
		820.8
		822.4
		824
		825.6
