# Supplementary material for: Calcium transfer from the ER to other organelles for optimal signaling in Toxoplasma gondii
Source: eLife. 2025 Nov 12;13:RP101894. doi: 10.7554/eLife.101894 (PMC12611264; doi:10.7554/eLife.101894)
Supplement: Figure 2—source data 1. [file elife-101894-fig2-data1.xlsx]

## Sheet: Figure 2B
Time(s)		Ca 55nm	Ca 110nm	Ca 220nm	Ca 880nm
0		91.07	100.6	100.9	96.67		Calcium concentrition		55nM Ca			110nM Ca			220nM Ca			880nM Ca
1		90.87	100.9	101.4	96.18		1		0.6961	0.7949	1.0283	2.3525	2.0097	2.49	3.0078	2.844	3.4545	3.7688	3.5235	3.8351
2		91.87	101.7	100.7	96.11
3		91.66	100.3	101.3	96.37
4		91.29	100.9	101.5	95.85
5		92.07	100.6	100.8	96.43
6		91.29	100.1	100.9	95.49
7		92.06	100.2	101.2	95.51
8		91.19	101	101.3	96.42
9		91.42	100.3	101.7	95.95
10		91.31	100.1	100.7	96
11		90.54	101	100.9	96.01
12		91.01	100.1	101.3	95.8
13		90.7	100.1	100.4	96.17
14		90.31	100	101.3	96.15
15		91.2	99.93	101.2	96.29
16		90.54	100.3	99.93	96.13
17		91.23	100	100.1	95.35
18		90.74	100.9	100.7	95.58
19		90.91	100.4	100.2	96.15
20		90.96	100	101.6	95.71
21		91.01	99.75	100.7	95.78
22		91.13	100.2	100.4	95.55
23		91.54	99.85	100.4	95
24		91.72	100.3	100.6	95.64
25		90.57	99.46	100.4	95.21
26		91.25	99.35	100.3	95.13
27		91.1	99.01	99.67	95.66
28		90.82	99.07	100.8	95.06
29		91.23	99.44	100.5	95.82
30		91.52	98.82	100.6	94.99
31		90.73	99.61	100.5	95.36
32		91.32	99.2	99.85	94.82
33		90.3	100.3	100.5	95.46
34		90.55	98.98	99.89	95.53
35		89.77	98.85	99.56	95.7
36		90.78	99.46	100.8	94.24
37		91	98.94	100.5	94.69
38		90.43	99.29	99.8	95.54
39		91.43	98.95	100.2	95.44
40		90.95	98.16	100.3	95.14
41		89.95	98.68	99.89	95.39
42		90.46	98.51	100.1	94.92
43		91.26	99.9	98.62	95.25
44		89.99	98.16	99.53	94.7
45		89.71	98.88	100.1	95.32
46		90.82	98.51	100.2	94.69
47		91.11	98.01	101	114.6
48		90.79	98.31	99.77	531.5*
49		90.98	98.32	100.1	111
50		90.62	98.39	100.1	101.5
51		91.3	98.05	99.79	106.5
52		90.43	98.17	99.7	111.5
53		90.35	98.38	100.1	117.7
54		91.4	98.4	99.76	122.7
55		90.54	1452*	99.94	128
56		90.44	243.7*	99.33	132.1
57		90.23	102.5	110.3	137.4
58		90.51	100.5	131.5	141.8
59		90.09	100.3	108	144.5
60		90.63	102.9	102.3	149.6
61		342.7*	103.9	103.3	153.4
62		294.1*	107.7	105.9	156.7
63		95.56	109	109	159.7
64		91.63	112.2	112.4	162.6
65		92.49	114.6	115.8	165.2
66		92.5	117.7	119.8	168
67		92.58	121	122.4	169.5
68		92.91	122.6	127.6	172.3
69		93.48	125.9	130.6	174.9
70		93.42	127.8	133	176.7
71		94.34	130	136.6	179
72		94.16	132.8	140	180.7
73		95.31	135	143.3	182.6
74		95.26	136.4	144.2	184.3
75		96.48	137.5	148.2	186.6
76		97.45	139.8	150.7	186.7
77		98.13	143.2	152.3	188.5
78		99.77	144.4	154.9	189.8
79		100.4	145.1	156.3	190.4
80		101	146.4	158.4	192.3
81		102.2	148.3	160.9	194.5
82		103.4	150	162.3	195.4
83		104.5	151.7	165.2	195
84		106.2	153.7	167.3	196.2
85		107.1	155.2	168.4	197.6
86		108.6	155.5	170	198.2
87		109.7	156.2	171	199
88		110	159.1	173.3	201.3
89		111.5	159.2	174.8	200.3
90		112.4	160.4	176.2	201.4
91		114.7	162.3	177.1	201.8
92		115.2	162.7	179.1	202.6
93		115.6	164.1	179.8	204
94		117	164.3	182.4	204.3
95		118	166	183	204.6
96		119.2	167.6	184.7	205.2
97		119.3	168.3	185.2	206
98		121.3	168.5	186.4	206.4
99		121.9	170.1	187.5	206.5
100		122	170.9	188.9	206.4
101		124.3	171.7	189.8	207.5
102		124.7	172.6	191.1	207.3
103		125.2	174.7	191.9	207.3
104		126.5	174.3	192.3	208.5
105		128.2	174.9	193	208.6
106		128.5	176.8	194.5	208.6
107		128.4	178.1	194.7	208.6
108		128.6	178	196	209.3
109		129.2	178.5	196	210.3
110		130.9	179.9	197	209.7
111		132.3	180.2	198	210.1
112		133	181.2	198.1	211.4
113		133.2	182	199.5	211.7
114		134.3	181.8	199.2	211.9
115		134.5	183.2	200	211.9
116		136.7	185.2	200.3	212.1
117		136.6	184.9	200.5	211.5
118		137.3	185.1	201.3	212.7
119		137.3	185.8	201.7	212.4
120		138.8	187	202	212.2
121		140.1	186.4	203.2	213.4
122		139.2	187.2	202.9	213.8
123		140	187.7	204.5	213.3
124		140.9	188.5	204.9	213.8
125		140.7	189.6	205.2	214.3
126		141.6	189	204.8	214.1
127		143	188.3	206.7	214.8
128		144.2	190.7	206.9	213.6
129		144.4	190.4	207.1	215.5
130		144	190.3	206.9	214.2
131		145.3	191.4	207.9	214.7
132		146.1	193.4	209.4	215.2
133		146.4	191.9	208.2	215.1
134		146.3	192.6	208.9	214.5
135		147.5	192.7	208.9	215.1
136		148.5	193.5	208.8	215.7
137		148.8	193.3	210.5	215.2
138		149.4	194.6	210.5	216.3
139		150.2	194.8	210	215.5
140		150	194	210.7	216.1
141		150.6	195.9	210.8	215.7
142		151.3	196	211.5	217.2
143		152	195.3	212.2	216.1
144		152.5	196.6	211.1	216.3
145		153.2	196	212.5	216.5
146		154.2	196.3	211	218
147		154	197	211.5	216.9
148		154.9	197	212.4	216.4
149		155.1	196.3	212.8	217.9
150		155.9	197.8	212.5	217.3
151		156.1	197.9	213	217.6
152		156.9	199.5	213.2	217.2
153		157.7	197.8	213.7	217.7
154		156.8	198.6	213.1	218.1
155		157.1	198.8	213.3	218.5
156		158.2	199.8	214.2	218.2
157		159	200.1	214.1	217.5
158		159.2	199.8	215.1	217.7
159		159	199.3	215.3	217.2
160		159.2	199	215.8	218.3
161		161.2	199.1	215.2	217.1
162		160	199.3	214.8	218.6
163		161.5	200.6	216.9	219.1
164		161.2	200.5	215.7	220.3
165		162.5	201.7	215.1	218.5
166		163.2	200.3	215.2	218.4
167		163.9	199.9	215.5	220
168		163.5	200.5	215.5	218.9
169		163.1	201.9	215.9	218.7
170		164.4	201	215.9	219.2
171		164.8	200.2	216.3	218.1
172		164.5	200.4	216.9	218.5
173		165.1	201.2	215.6	219.8
174		165.2	201.3	217.3	218.9
175		167.2	201.5	217.2	218.9
176		165.1	202.3	216.2	218
177		166.9	201.5	217.4	219
178		166.8	202.2	217.3	218.9
179		167.3	202.1	216.3	219.3
180		168.2	202.3	218.7	218.7
181		167.4	203.6	218.1	217.8
182		168.8	202.3	218.9	218.9
183		169	203.3	218.1	219
184		169.1	204.5	217.6	219.9
185		169.9	202.3	217.7	218.9
186		169.8	202.4	218.2	220.1
187		169.8	203.6	218.3	219.1
188		170.6	203.6	218.8	219.3
189		172.5	202.5	218.2	219.3
190		171.5	203.2	218.3	219.1
191		171.6	203.6	218.4	219.7
192		171.8	203.4	219.1	219.5
193		171	203.3	218.1	219.3
194		172.9	202	219.4	218.8
195		173.2	202.8	218.6	219.7
196		172.8	203.4	218.1	218.8
197		172.1	203.9	218.3	219.5
198		173	204.2	219	220.6
199		172.9	204.5	218.8	220
200		174.3	204.1	218.3	219.1
201		174.5	203.7	218.3	219.5
202		174.8	205.3	218.9	220.5
203		175.7	203.9	218.2	220.3
204		173.9	204.7	218.5	219.2
205		175.2	204	219.4	219.2
206		175.6	205.1	218.9	219.5
207		176	204.4	219.5	219.4
208		175.5	204	219.8	220
209		175.7	204.4	219.1	218.9
210		177.2	206.4	219.8	220.2
211		176.7	203.9	219.6	218.9
212		176.3	204.5	219.8	220
213		177.5	205.2	219.1	219.2
214		177.1	205.4	219.3	220.3
215		178.1	204.2	219.9	219.6
216		178.2	204.6	220.3	220.1
217		178.1	204.2	219.8	220.3
218		178.3	205.3	220	220.6
219		177.9	205.7	219.3	219.4
220		178.7	204.8	220.3	220
221		178.6	205.3	220	218.8
222		179.4	205.5	221.4	219.9
223		178.3	205.5	219.9	220.3
224		179.9	204.9	219.5	220.3
225		179.3	205.1	220.9	220.2
226		179.8	204.5	221.1	219.2
227		180.1	204.5	220.3	221.4
228		181	205.7	219.7	220.1
229		181	205.8	220.8	219.8
230		180	205.3	221.4	221.1
231		181.5	204.7	221.1	220.4
232		180.8	206	219.2	220.3
233		180.1	204.4	220.5	219.5
234		181.4	205.6	221	220.5
235		181.2	204.7	220.9	220.8
236		181.5	204.2	221.4	220.3
237		182.3	205.9	221	220.7
238		181.8	205.9	220.6	219.2
239		181.7	205.1	221.2	220.3
240		182.3	205.5	221.9	219.6
241		182	205.1	221.3	221.3
242		182.1	205.3	220.8	220.6
243		182.9	206.1	221.3	220.9
244		183.4	205.1	220.7	220.3
245		184.4	206.8	221.5	220.4
246		183.1	205.6	220.9	220.9
247		182.8	204.5	220.8	220.6
248		183.5	205	221.4	220.2
249		184.1	205	222	220.5
250		184.1	205.9	221	220.7
251		183.6	206	220.3	220.9
252		184.4	205.3	220.7	220.1
253		184.5	204.5	221.3	219.1
254		184	205.5	221.2	220.8
255		184.2	205.8	220.7	220.5
256		184.8	205	221.8	219.2
257		184.3	204.7	220.7	220.9
258		184.8	206.9	221.2	220.5
259		186.1	205.4	221.4	218.9
260		186.4	204.4	221.7	220.3
261		185.4	205.4	222.5	221
262		185.1	205.1	221	221.7
263		185.8	204.3	221.4	220.3
264		185.6	204.7	220.9	220.8
265		185.8	206.3	221.1	220.4
266		186.1	205.2	221.3	221.2
267		186.6	205	221.4	219.2
268		187.2	205.7	221.2	220.7
269		187.3	205.2	222.2	220.3
270		186.9	204.7	221.3	220.5
271		186.4	205.1	221	219.8
272		187.9	204.7	220.2	219.6
273		187	204.5	222.6	219.8
274		186.8	205.1	221.3	219.8
275		186.4	204.9	220.9	220.8
276		188.4	204.6	221.7	220.4
277		187.5	204.3	221.6	220.8
278		188.2	205.5	220.7	219.6
279		187.8	204.3	221.2	220.4
280		188.6	204.4	221.8	221
281		188.2	204.2	221.8	220.3
282		188.3	205.5	221.8	221
283		187.7	205.1	223.2	220.4
284		187.8	204.3	221.3	219.1
285		187.3	204.4	221.7	220.4
286		189.2	204.5	221.7	220.2
287		188	203.5	222.5	220.5
288		188.9	204.7	221.1	220
289		189	206.1	222.4	220.6
290		188.5	204.8	221.4	220.8
291		187.4	205.1	221.5	220.8
292		188.1	206.2	221.1	220.2
293		188.6	204.8	222	219.4
294		188.7	205	222.1	220.1
295		188	204.6	221.5	219.5
296		188	204.6	220.8	219.7
297		190.3	203.4	222.1	219.9
298		189.6	203.6	220.4	220.2
299		189.1	204.2	221.8	219.8
300		189.5	205.5	221.1	220
301		189.8	204.4	221.7	219.7
302		189	203.3	221	221
303		189.7	204.1	222.2	218.7
304		189.4	204.4	222.3	219.4
305		190.4	204.2	221.2	219.7
306		189.2	203.8	221	220
307		189.5	204.3	221.5	219.5
308		190.8	203.6	221.5	220.3
309		190.4	204.7	222	219.2
310		190.5	204.8	222.7	219.9
311		189.4	204.7	222.6	221.2
312		189.3	204.1	221.2	220.3
313		189.5	204.9	221.2	218.7
314		190.3	203.9	220.3	220.1
315		189.9	203.4	221.7	219.4
316		190.7	203.9	222.4	219.7
317		189.8	204	222	220.1
318		191.5	204.7	221.4	220
319		191.3	204.3	220.9	220.7
320		191.5	203.7	221.5	220.5
321		190.2	203.8	220.9	220.7
322		190.8	203.6	221.8	220.1
323		191	204.9	221.2	220.3
324		191.2	203.1	221	221.4
325		190.3	204.8	220.1	220.6
326		191.4	203.7	222.5	220.1
327		191.1	203.6	221.4	219.8
328		192	203.8	221	220.5
329		191.6	202.9	222.4	219.9
330		191.4	205	221.4	219.7
331		191.7	203.8	221.3	220.4
332		192	203.1	221.2	220.9
333		192.1	202.8	221.3	220.1
334		191.6	201.9	221.4	219.6
335		191.5	203.2	221.4	220.2
336		192.2	203.7	221.3	219.4
337		192.2	202.8	221.9	219.7
338		191.8	203.8	220.6	219.6
339		191.1	204.1	221.3	219.3
340		192.3	203.1	221.1	220.3
341		192	203.4	220.6	219.8
342		193.1	203.4	220.9	220.6
343		191.4	203.9	221.5	219.7
344		192.2	203.4	222	220
345		191.7	204.1	221.9	220.1
346		192.3	202.9	221.9	219.1
347		192.5	203.2	221.3	219.8
348		192.6	202.8	222.1	219.4
349		191.8	203.2	220.7	220
350		192.2	202.6	222.5	221.6
351		192.1	203.5	221.3	219.6
352		192.1	202.6	220.7	219.1
353		191.9	204	221.5	219.8
354		192.8	203.2	221.1	219.3
355		192.8	203.1	220.6	219.7
356		192.1	203.2	221.5	218.3
357		193.5	202.5	221.4	218.9
358		191.9	202.9	220.6	219.6
359		191.8	202.5	221.5	219.1
360		192.4	203.4	220.7	218.9
361		191.9	202.4	220.9	220.2
362		193.6	202.8	220.4	218.8
363		191.3	203.3	221.8	219.8
364		193.9	202.4	220.6	220
365		193.9	202.1	221	219
366		192.9	203.3	221	219.1
367		193.2	202.8	221.4	218.9
368		193	202.1	221.3	219.8
369		192.7	201.4	221.2	218.7
370		193.7	200.9	220.6	219.4
371		193.7	202.8	220.4	219.2
372		193.1	201.2	220.8	219.7
373		193	201.9	220.6	219
374		193.3	202.9	222.2	218.9
375		192.9	201.9	220.1	219.4
376		192.6	203.5	220.4	220
377		193.9	202.4	220.6	219.3
378		192.7	201.9	221.3	220.4
379		193.3	202	220.6	218.2
380		192.7	202.3	221.7	218.7
381		193.2	202.5	221.6	219.7
382		193.5	201.6	220.2	218.8
383		193.7	203	221.2	220.1
384		193.4	202.2	220.8	219
385		192.6	202	220.3	219.3
386		193.7	202.2	220.5	219.5
387		193.2	202.4	221.7	219.5
388		193.2	200.7	219.8	219.3
389		193.8	201.7	220.2	218.4
390		192.3	201.5	220.2	218.8
391		193.5	201.9	220.4	218.8
392		193.6	201	221.1	218.9
393		194.3	202.7	221.3	218.9
394		193.8	200.2	221.6	219.7
395		193.4	201.1	221.3	218.9
396		194.2	201.8	220.8	219
397		192.9	201.5	219.5	218.4
398		193.8	202.3	220.5	220
399		193.4	200.7	220.9	218.8
400		193.7	201.3	220.4	218.6
401		194.7	200.1	221.2	219.4
402		194.2	201.6	220.8	219.6
403		193.4	201	220.3	219
404		193.8	202.2	220.6	218.8
405		192.6	201.2	220.4	219.6
406		193	201.7	221.6	219.1
407		193.1	202	219.5	219.1
408		195.4	200	222.8	219.4
409		194.1	201.8	219.9	219.2
410		193.2	200.6	221	217.4
411		193.5	201.9	220.2	217.8
412		193.3	200.7	220.9	218.6
413		193.1	200.5	221.4	218.4
414		193.1	200.7	220.4	218.5
415		194.5	199.3	220.5	219.3
416		193.3	200.6	219.6	218.6
417		194.4	201.1	220.1	219.5
418		193.5	201.1	221	218.4
419		193.7	201.1	220.7	218
420		194.1	201.5	219.9	218
421		194	200.7	220.1	218.6
422		193.7	200.3	220.3	218.3
423		193.8	200.9	220.8	218.5
424		194.2	199.9	220	218
425		194.8	200.5	219.8	218.1
426		194.6	200.4	220.4	218.9
427		193.7	199.8	219.5	218.4
428		192.9	200.2	221.2	218.3
429		195.1	199.2	220.7	218
430		193.1	200.4	221.1	218.5
431		194.9	200.1	219.2	218
432		194	199.7	220.9	218.2
433		194	199.1	220.5	218.2
434		193.7	200	220.7	218.6
435		194.3	199.7	220.6	218.5
436		194.2	200.2	220.6	218.8
437		194.2	199	220.3	218.7
438		193	200.2	220.2	217.6
439		193.4	198.6	220.2	218.5
440		193.8	200.4	219.9	217.7
441		194.4	199	220	218.4
442		193.8	198.8	219.4	218.3
443		194.3	199.3	219.8	219
444		194.8	200.3	219.4	216.9
445		193.9	199.1	220.5	218
446		193.6	200.3	219.5	218.5
447		194.4	199.9	220.1	217.9
448		194.1	200	220.5	217.9
449		194	199.4	220.7	218.3
450		194.1	199.3	220.5	216.8
451		193.7	198.9	220.2	217.6
452		193.8	199.5	219	217.3
453		194.4	199.6	219.6	218.7
454		194.3	199.3	218.9	218.6
455		193.4	200	219.2	217
456		193.7	200.1	220.3	218.3
457		193.7	199.8	220.4	216.9
458		193.5	198.9	219.3	218.2
459		194.1	198.9	220.1	217.5
460		196.1	199.5	219.1	218.1
461		193.6	198.6	219.7	218.2
462		194.3	199.2	219.5	217.8
463		193.6	199	218.8	218.2
464		194	198.6	220	217.7
465		194.2	198.3	220	217.5
466		193.4	199.3	220.9	217.3
467		193.5	198.3	219.5	217.9
468		194.8	197.6	219	219
469		194	198.8	219.3	217.8
470		194	199	219.4	217.9
471		193.6	198.4	219.9	217.2
472		194.4	198.4	218.6	218.2
473		194.8	197.9	219	216.7
474		193.9	198.4	218.9	217.2
475		193.2	199.5	220.3	217.6
476		194.4	198.1	219.5	217.2
477		194.1	198.8	218.8	217.4
478		193.5	198.2	219.4	217
479		194	198.6	219.2	217.7
480		194.1	198.2	220.3	217.7
481		193.8	197.9	219.9	218.2
482		193.9	198.6	219.8	217.2
483		194.1	197.8	219.7	218.1
484		193.5	197.8	218.3	217.3
485		194.3	197.7	219.3	217.9
486		193.4	198.8	219.8	217.4
487		193.8	197.8	218.9	217.6
488		193.9	197.9	219.2	217.2
489		195.1	198.5	218.5	217.9
490		194.5	198.2	219.9	217.1
491		194.3	197.4	218.2	217.6
492		193.9	197.6	218.8	217.4
493		195.6	198	218.7	217.2
494		193.6	198.6	219.9	216.6
495		194	197.3	219.1	217.1
496		193.2	197.6	218.9	217.4
497		195.2	196.8	218.3	217.1
498		193	198.3	218.3	217.3
499		193.5	197	218.1	217.6
500		194.1	197.5	219.1	216.3
501		193.1	196.6	218.8	216.7
502		194.4	196.7	219.5	217.2
503		193.7	197.2	219.3	217.4
504		193.9	197.2	218.5	217.2
505		195	196	218.5	217.7
506		194.1	197	219.5	217.2
507		194.3		218	217.4
508		167.8		218.7	217.5
509		168.6		218.1	216.1
510		169.9			216.3
511		167.5			217.3
512		168.8
513
514
515
516
517

## Sheet: Figure 2C
			TIME(s)		25uM MgATP	50uM MgATP	125uM MgATP	250uM MgATP	500uM MgATP
			0		93.49	92.56	89.1	86.77	88.22
			1		92.99	92.3	89.98	86.47	86.92		MgATP concentrition		25μM MgATP			50μM MgATP			125μM MgATP			250μM MgATP			500μM MgATP
			2		94.35	92.22	89.42	87.15	87.8				0.2204	0.1986	0.2978	0.5491	0.6006	0.9164	1.9247	1.8721	2.1264	2.8066	2.7342	3.0643	3.4812	3.2327	3.6055
			3		93.41	92.28	88.88	86.55	88.27
			4		93.48	93.6	89.41	85.96	87.52
			5		93.27	92.13	89.61	86.12	88.35
			6		93.4	91.9	88.81	86.22	88.1
			7		93.38	92.2	88.83	86.45	87.49
			8		92.8	92.5	89.15	86.55	87.78
			9		92.99	92.28	89.23	86.76	88.08
			10		93.62	91.79	89.22	86.07	87.21
			11		93.18	92.26	88.98	86.85	87.47
			12		92.86	92.35	88.93	86.47	88.04
			13		93.38	92.07	89.59	86.75	87.27
			14		93.41	92.03	88.84	86.74	87.64
			15		93.37	92.36	88.71	85.89	87.69
			16		93.06	90.99	89.06	86.32	87.42
			17		93.44	91.87	89.19	86.17	86.75
			18		92.84	91.9	88.68	86.89	86.85
			19		93.39	92.19	88.54	86.15	87.21
			20		92.93	92.1	89.02	86.03	87.71
			21		92.71	91.56	88.58	86.44	87.36
			22		93.22	91.82	89.47	86.42	87.41
			23		93.2	90.92	88.35	85.94	86.69
			24		92.78	91.41	88.26	85.95	86.54
			25		92.73	91.44	88.69	86.32	87.32
			26		93.15	91.78	88.82	86.35	87.26
			27		93.28	91.85	88.74	86.62	86.93
			28		92.68	91.62	88.86	86.74	87.07
			29		93.29	91.7	89.59	86.01	87.04
			30		92.26	91.76	88.71	85.79	86.59
			31		93.04	91.19	88.43	86.39	87.31
			32		92.64	91.89	88.98	85.62	86.3
			33		93.05	90.97	88.57	86.58	87.36
			34		92.03	91.64	88.34	85.48	87.1
			35		92.46	91.1	88.63	86.21	87.19
			36		92.99	91.42	88.97	85.76	87.14
			37		92.19	91.13	88.63	86.15	86.94
			38		92.81	91.16	88.33	85.46	86.82
			39		92.82	91.15	88.42	85.65	86.7
			40		92.6	91.61	88.43	85.68	86.11
			41		92.49	91.88	88.28	86.02	86.94
			42		92.75	90.79	88.88	85.65	86.24
			43		92.22	91.45	88.15	85.74	86.29
			44		92.68	91.49	88.67	85.41	86.77
			45		92.27	91.91	88.38	85.54	87.18
			46		92.84	91.79	88.18	85.64	86.62
			47		93.01	90.82	88.24	85.77	86.81
			48		92.83	91.15	87.7	85.68	475.8*
			49		92.56	91.12	88.88	86.19	258.3*
			50		92.8	92	485.6*	86.02	98.31
			51		92.72	90.76	125.6*	294.1*	93.42
			52		93.14	112.8*	90.78	326.4*	93.72
			53		91.91	123.8*	90.34	92.32	94.76
			54		92.36	92.64	90.95	89.41	97.25
			55		92.68	91.73	92.14	91.23	99.49
			56		92.37	92.26	92.49	91.45	104.2
			57		93.23	92.41	93.97	92.37	106.8
			58		92.35	92.71	95.36	94.39	110.6
			59		91.98	92.78	96.85	97.45	114.7
			60		140.5*	92.69	98.3	99.66	119.7
			61		105.2*	94.05	100.7	103.6	123.6
			62		92.86	93.97	102.9	106.9	127.8
			63		92.27	94.37	105.4	110.6	129.3
			64		92.51	94.83	107.9	112.9	133.4
			65		92.73	95.7	109.9	116.7	136.2
			66		93.29	96.8	112.2	119.8	139.2
			67		93.11	96.84	115.3	122.7	142.1
			68		93.27	97.25	116.5	125.3	145
			69		93.25	98.41	118.5	127.8	147.3
			70		93.3	99.38	121.1	131	148.7
			71		94.7	100.3	123.5	133	152
			72		93.71	101.2	124.4	135.4	155.7
			73		94.65	101.9	126.1	136.7	157
			74		94.34	103	127.9	139.1	157.5
			75		94.22	103.5	129.7	141.1	160.7
			76		94.36	104.9	131.9	143.7	161.7
			77		95.38	106.8	133	143.5	163.3
			78		95.44	106.6	134.6	146.4	164.8
			79		95.55	108.4	135.8	148	165.4
			80		96.16	108.7	137.5	149.7	166.3
			81		95.53	109.9	138.7	151.6	167.9
			82		96.97	111.6	140.2	152.9	169.3
			83		97.27	112.4	141.1	154	169.7
			84		97.06	112.3	142.5	155.6	171.7
			85		96.91	112	145.6	157.3	172.9
			86		98.35	114	145.6	157.8	174.8
			87		99.37	115.5	147.2	159	175
			88		99.2	116	147.4	160	176.2
			89		100.1	116.6	148.8	160.7	176
			90		99.95	118	149.7	162.2	177
			91		100.7	118.7	152.7	162.9	178
			92		100.6	118.9	151.7	164.7	178.9
			93		101.1	120.3	152.7	164.8	180.1
			94		102	122	155.1	165.6	180.6
			95		102.6	122	155.7	166.2	181.6
			96		103.2	122.2	156	167.6	181.3
			97		102.7	123	156.7	168.3	182.3
			98		103.8	123.3	157.3	168.3	182.4
			99		104.2	124.4	158.1	169.4	182.8
			100		105.2	124.8	159	170.1	183.5
			101		105	125.6	159.6	170.5	183.5
			102		105.5	127	161.2	171.2	184.1
			103		106.2	127.7	161.5	172.6	185
			104		107.1	127.1	162.8	172.8	184.8
			105		107.1	128.7	162.9	173.4	186.9
			106		107.7	129.1	164.1	173.2	186
			107		107.8	129.7	166.2	174.8	186.4
			108		108.4	130.7	164.5	174.8	186.1
			109		108.2	131.1	165.7	175.8	187.9
			110		108.9	131.4	166.3	175.6	187.7
			111		109.5	131.8	167.3	176.2	186.8
			112		109.2	132.6	166.8	177.6	187.2
			113		110	133.1	167.6	176	188.3
			114		110.1	133.9	168.5	176.8	188.7
			115		112.1	134.6	168.2	178	188.9
			116		111.6	134.3	169	177.3	188.9
			117		111.3	135.4	169.9	179	189.4
			118		111.9	135.9	171.1	178.2	190.2
			119		112.5	136.1	171.9	178	190
			120		112.6	136.7	171.7	179	190.2
			121		112.6	136.8	171	179.7	190.5
			122		113.4	137.8	171.6	180.1	190.3
			123		113.8	138.7	172	180.4	190.3
			124		114.6	138.5	173	180.4	191
			125		114.4	139.4	172.7	181.7	191.1
			126		114.4	139.8	173.1	179.9	191.1
			127		115	140.6	173.9	181.4	192.3
			128		115	141.9	174.2	181.6	191.5
			129		116	141.6	174.7	181.5	192.2
			130		115.9	142	175.4	181.7	191.3
			131		116.2	143.1	175.1	182.9	191.7
			132		116.4	142.8	176	182.5	192.2
			133		117	144.3	176.2	182.4	193.2
			134		117.8	143.8	176	184.1	192.7
			135		117.3	144.4	177	182.4	192.4
			136		118.4	144	177.6	182.8	193
			137		118	145.9	177.9	182.7	192.8
			138		118.5	146.4	177.9	183.8	193.3
			139		119.6	146.1	177.6	183.9	193.5
			140		119.1	146.2	178.3	183.6	193.9
			141		119.6	148.2	178.8	183	193.6
			142		120.2	147.3	178.5	183.2	193.1
			143		120.4	148.4	179.4	183.5	193.6
			144		121.1	148.9	179.1	184.6	193.9
			145		120.8	148.9	180	183.9	193.7
			146		121.2	149.1	180.2	184	195
			147		120.5	149.1	179.9	184	193.4
			148		121.3	149.6	180.8	184.4	194.3
			149		121.6	149.5	180.2	185.3	195.9
			150		121.9	151.3	181.1	184.4	194
			151		122	151.6	180.8	184.8	194.4
			152		122.8	151.1	181.3	184.5	195.1
			153		122.6	152.4	181.2	184.6	195.1
			154		123.3	151.3	181.4	183.9	194.7
			155		123	152.7	181.6	185.4	194.5
			156		123.6	153.1	181.6	186	195
			157		124.4	153	181.2	185.7	193.9
			158		124	153.2	182.7	185.4	194.8
			159		123.7	153.9	182.1	185.9	195
			160		124.6	153.8	182.3	184.7	195.1
			161		125.4	154.3	182.4	185.5	194.8
			162		124.4	154.9	182.7	186.9	196.4
			163		125.3	154.8	182.6	185.9	195.2
			164		124.9	155.7	182.5	185.9	195.5
			165		125.7	156.3	183.7	186	196.2
			166		125.7	157.2	183.3	186.5	195.9
			167		126.9	156.3	183.4	186.4	198.6
			168		126.8	156.7	184.4	186.2	195.6
			169		125.8	156.6	183.5	186.3	195.2
			170		126.3	157	183.4	186.3	196.4
			171		127.3	157.7	184.3	186.1	195.7
			172		127.4	158.2	183.9	186.6	195.6
			173		128.1	158.3	184.7	186.4	195.6
			174		127.8	158.9	183.5	186	195.7
			175		128.4	158.7	184.5	186.3	197
			176		128.2	158.5	185.2	187.3	195.3
			177		129.1	158.6	185.2	187.4	195.4
			178		128.9	159.6	184.3	187.4	196.9
			179		129.2	159.9	185	186.4	196.6
			180		128.1	159.9	184.6	187	196.8
			181		129.4	160	184.6	187.8	195.5
			182		129.6	161	184.9	186.8	197.4
			183		129.1	161.2	185.3	187.4	195.9
			184		129.8	161.5	184.9	186.6	196.2
			185		130.4	161.6	185	187	196.2
			186		130.5	161.7	185.5	187.1	195.8
			187		131.7	162.3	185	187.2	196.4
			188		131.1	161.9	185.8	186.8	196.5
			189		130.7	162.3	185.5	187.4	195.8
			190		130.1	162.2	186.2	187.4	196.6
			191		131.5	164.1	186.2	187.4	196.1
			192		132	163.9	185.1	187.2	196.5
			193		131.3	163.5	185.2	186.3	196.4
			194		131.5	164.5	186.8	187.7	196.1
			195		132	164.3	186	187.3	196.2
			196		132.1	164.7	187.7	185.9	196.4
			197		131.6	165.2	185.5	187.2	196.2
			198		132.4	164.6	185.7	188.2	196.5
			199		132.8	164.5	186.9	186.8	197.2
			200		132.6	165.4	186.4	188.6	197.3
			201		134	164.9	185.5	188.4	198.1
			202		133.7	165.6	186.4	187.6	197.4
			203		134.1	166.4	187.1	187.2	196.3
			204		134.4	166.4	186.9	187.9	196.9
			205		133.4	166.6	186.9	186.8	196.8
			206		134.2	166.1	186.9	187	198.4
			207		134.7	166.5	186.7	187.5	196.7
			208		135.4	167.1	186.5	186.6	196.9
			209		135.1	167.5	186.3	187.4	196.7
			210		135.6	167.1	187.7	186.9	197
			211		134.9	167	186.6	187.2	197.1
			212		135.4	167.7	187.1	188.3	196.6
			213		136.1	168.1	187.3	187.1	197.4
			214		135.5	168.7	187.6	187	199
			215		136.6	168.2	186.8	186.7	196.5
			216		136.3	167.8	188.3	186.7	197.7
			217		137	169	187.6	188	196.7
			218		136.9	170.6	188	187.5	197.4
			219		137.4	170.3	187.9	187.4	196.2
			220		136.9	169.5	187.7	187.8	196.6
			221		137.9	169.4	187.9	187.1	195.3
			222		137.5	169.9	187.6	187.8	196.6
			223		137	168.6	188	187.8	198.2
			224		137.7	169.5	187.5	187.3	198.3
			225		138.8	170.2	187.1	187.6	197.3
			226		138.6	170	188.7	187.7	196.9
			227		138.1	170.7	187.9	187.3	197.3
			228		138.6	171.3	187.6	188	197.3
			229		139.1	170.7	187.3	187.6	196.3
			230		138.9	170.1	188.1	188	196.9
			231		138.8	170.3	188.1	187.6	197.8
			232		139.8	171.2	188.7	187.2	197
			233		139.3	171.6	187.8	187.4	196.7
			234		139.1	170.9	188	187.9	196.8
			235		139.4	171.1	187.9	187.9	197.2
			236		139.5	171.4	188.5	188	196.2
			237		139.7	171.4	188.1	187.9	196.9
			238		139.7	172	188.6	186.9	197
			239		140.7	172.6	188.5	187.8	197
			240		140.8	172.6	188	187.2	196.9
			241		140.1	173.1	187.8	187.1	197.6
			242		141.4	172.3	187.5	187.7	196.7
			243		140.7	173.6	188.6	187.6	196.4
			244		141.9	172.9	188.1	187.1	197
			245		141.3	172.5	188.4	188.1	196.8
			246		141.5	172.7	188.5	187.3	197.1
			247		140.4	173.4	188.8	187.5	196.2
			248		142.2	173.7	188.2	187.7	197.6
			249		142.7	173.2	188.7	187.8	197.2
			250		142.2	173.5	187.8	187.5	197.2
			251		143.3	174.2	189	187.3	197
			252		142.7	173.8	188.2	187.8	197.8
			253		142.3	174.4	188.5	187.6	196.9
			254		143.2	174.7	188.8	187.3	198.3
			255		142.4	174.5	187.9	186.9	196.6
			256		143.1	174.1	188.5	187.2	196.5
			257		143.3	174.3	188	188	198.9
			258		143.5	174	189	187.8	197
			259		143.5	174.3	188.7	188.3	197.1
			260		144.5	175	188.8	186.9	197.1
			261		143.7	175.5	188.7	188.2	197.6
			262		144.4	175.4	189.2	187.2	198.5
			263		144.3	175.3	187.9	187.6	197.3
			264		144.3	174.5	187.9	187.6	197.8
			265		144	175.5	188.9	187.5	197.6
			266		145.1	175.9	188.8	187.1	197
			267		144.9	175.1	188.7	187.6	197.5
			268		144.5	175.7	188.5	189	198
			269		145.2	174.9	188.4	187.9	197.1
			270		145.3	175.6	188.7	187.8	197.5
			271		146	176.6	189	186.6	197
			272		145.8	176.3	189.1	188.5	197.1
			273		145.8	176	187.9	188	197.6
			274		146.3	176.1	189.1	189	196.7
			275		145.8	177.9	188.7	187.7	198
			276		146.6	176.5	188.2	187.6	197.7
			277		145.6	176.9	188.9	187.6	196.7
			278		146.8	177.4	189.5	187.8	196.2
			279		146.2	176.8	188.4	186.8	197.3
			280		147	176.4	189.7	187.9	198.2
			281		146.1	176.3	188.6	187.9	196.9
			282		146.8	176.7	188.6	187.4	196.7
			283		146.8	177.4	189	188	197.7
			284		147.4	176.8	189.5	187	196.2
			285		147.3	176.8	188.2	186.9	196.1
			286		147.3	177.1	188.5	187	196.8
			287		147.5	178	188.7	188.5	198.1
			288		147.6	176.9	187.9	187.5	197.1
			289		148.5	177.5	187.7	187.5	197.4
			290		148	177.7	189.4	187.3	196.5
			291		147.8	177.8	189.4	187.3	197.8
			292		148.3	178.2	189.4	188.3	196.7
			293		148.1	177.5	188.1	187	197.2
			294		148.9	177.9	188.9	186.4	197.1
			295		148.6	178	189.3	187.8	197.4
			296		148.6	178.7	189.6	186.8	196.9
			297		148.7	177.6	188.5	187.8	198
			298		149.2	178.1	189.5	186.4	196.7
			299		149.4	178.2	187.8	187.5	197.4
			300		149.7	178.6	187.9	187.2	197
			301		149.5	178.1	188.9	187	196.5
			302		149.6	178.2	188.5	187.5	198.1
			303		150	178.3	188.1	187.5	196.9
			304		149.6	179.1	188.6	187.6	197.7
			305		149.7	178.2	188.2	186.5	197.1
			306		150	178.6	188.1	187.1	196.8
			307		150.1	178.5	188.3	187.4	195.9
			308		150.1	178.7	188.1	187.6	196.8
			309		150.3	178.1	188.8	187.3	197.5
			310		151.1	179.2	189	186.5	196.2
			311		150.3	178.8	187.9	187.6	197.3
			312		150.5	178.6	188.3	187.2	196.6
			313		150.4	179.5	188.2	187.5	197
			314		150.8	178.6	187.7	187.1	196.4
			315		150.9	178.8	188	186.2	197.5
			316		151.9	178.4	188.8	187.6	197
			317		151.5	179.1	188.7	186.6	196.8
			318		150.3	178.3	189	186.9	197.1
			319		151.1	180.4	188.9	186.8	197.4
			320		151.5	179.3	188.3	187.3	196.2
			321		152.3	179.9	188.7	187.6	197.3
			322		152	179.5	188.3	187.4	197.2
			323		151.4	179.1	188.5	187.1	196.2
			324		152.4	180.2	187.8	187.8	196.1
			325		152.7	179.9	188.3	187	197.2
			326		152.5	179.7	188.2	186.8	197
			327		152.6	179.9	189.1	186.4	196.8
			328		153	180.5	188.6	187.7	197.1
			329		153	179.8	188.4	187.3	195.8
			330		152.8	180	188.2	187.3	198.3
			331		153.2	180.4	187.9	187	197.1
			332		153	179.4	187.5	186.4	196.7
			333		153	180	187.5	186.4	197.4
			334		152.9	180.3	188.1	186.8	197.6
			335		153.1	181.2	188.7	187.2	196.4
			336		153.8	180	188.5	186.2	197.2
			337		153.2	179.1	188.3	186.2	197.1
			338		153.7	180.2	188.7	186.6	196.2
			339		153.9	180	188.4	186.6	196.7
			340		153.7	179.7	187.4	187.4	196.5
			341		154.6	180.2	188.4	186.9	196.6
			342		154.6	180	187.6	186.6	197.1
			343		154.3	180.6	187.5	186.9	196.8
			344		154.7	181	188.2	187	196.7
			345		154.5	180.8	188.7	186.5	196.9
			346		154.7	180.5	188.4	186	196
			347		154.2	180.4	188	186.3	196
			348		154.6	180.9	187.7	185.7	196.5
			349		154.3	181.2	188.6	186.9	197.1
			350		155	180.8	187.9	185.4	196.4
			351		155.4	180.8	188.4	186.5	196.8
			352		154.4	180.7	188.1	187.1	197.1
			353		154.8	181.5	187.1	185.6	196.1
			354		155.6	181.3	187.7	186.4	196.2
			355		155.9	180.7	187.3	186.4	197.2
			356		155.4	180.3	187.7	186.3	196.9
			357		156.1	181.3	188	185.5	197
			358		155.3	180.3	187.6	186.2	196.7
			359		155.4	181.2	188	185.8	198.5
			360		156.3	181.4	188.1	187.3	195.6
			361		156.2	180.7	187.5	185.8	197
			362		156.4	180.7	187.7	186	196.5
			363		155.3	181	187.5	186	196.1
			364		156.2	181.3	187.6	186.5	196.5
			365		156.1	181.1	187.9	186.5	196.7
			366		157.1	180.5	187.2	186.5	196.3
			367		156.6	181.6	187.7	185.8	196.1
			368		156.3	182.5	187.3	185.9	196.5
			369		156.4	181.4	187.3	185.7	196.9
			370		156.8	181	188	186.1	195.8
			371		156.9	181.5	188.1	185.2	195.9
			372		157.5	180.7	188	186.1	198.3
			373		156	181.9	188.4	185.3	195.8
			374		156.8	181.2	187.1	185.3	196.3
			375		157.2	181.1	188.5	186.2	197
			376		156.9	180.5	187.5	186.5	196.2
			377		157.4	181.1	187.2	185.6	196.4
			378		156.9	181.9	187.9	185.3	197.4
			379		157.6	181.4	188.7	185.2	195.8
			380		156.8	181.7	187.3	187.2	196.5
			381		157.5	181.1	187.8	186.7	195.5
			382		157.5	181.7	187.2	184.9	196.9
			383		157.4	181.7	187	185	195.9
			384		157.8	181.5	186.7	185.8	195.3
			385		157.5	180.9	187.1	185.2	196
			386		157	181.3	188	185.8	196.1
			387		157.5	181.8	187.1	186.5	195.8
			388		158.5	181.3	188	186.2	196.4
			389		158.2	182.3	189	186.4	195.8
			390		157.8	181.3	186.9	185.3	196.7
			391		158.4	182.7	187.9	185.6	196.4
			392		157.8	182.6	186.6	185.8	195.5
			393		159.2	181.5	187.8	185.5	196
			394		158.9	181.8	186.8	185.7	196.7
			395		158.2	182.1	187.2	185	197
			396		159.4	181.4	187.3	185.8	195.3
			397		158.5	182.2	187.1	185.8	196.7
			398		159.5	181.7	186.5	185.3	196.1
			399		158.5	181.5	186.6	185.5	196.1
			400		159.3	181.7	187	184.8	195.9
			401		158.8	181.7	187	186.2	195.6
			402		159.4	182.4	185.7	185.7	196.7
			403		160.1	182.1	188.1	185.8	195.4
			404		158.4	181.9	187.2	185.5	196.3
			405		159.4	182.8	187.4	185	195
			406		159.7	181.4	187.3	186.4	196.5
			407		158.8	182.3	186.8	184.9	195.5
			408		159.4	182	187.1	186.3	195.9
			409		158.9	181.8	187.4	185.5	196.5
			410		159.2	182.7	187.8	184.4	196.4
			411		159.9	181.5	187.4	184.8	195.7
			412		159.4	182.6	187.3	186	195.5
			413		159.9	181.9	186.5	186.1	195.6
			414		160	182.3	187.3	185.3	196.2
			415		160.5	182.3	186.7	185	195.6
			416		160.8	181.6	187.2	184.6	196.5
			417		159.5	182.3	187.1	184.9	195.8
			418		160.6	182.7	187.2	184.8	196.8
			419		160.5	181.8	186.8	184.3	195.9
			420		160.4	182.3	186.5	185.3	196.3
			421		160.1	182.1	186.7	184.6	196.2
			422		160.4	181.3	187.6	186.1	195
			423		159.9	182.8	186.3	185.3	195.7
			424		160.9	181.7	187.1	184.7	195.5
			425		160.6	182.5	186.6	185.3	195.5
			426		161.2	183	187.2	184	196.1
			427		160.9	182.3	186.8	185.2	195
			428		161.1	182.4	186.2	184.6	195.6
			429		159.8	183.1	186.3	184.7	196
			430		160.1	181.6	186.6	184.5	195.8
			431		161.2	182.1	185.8	184.5	194.7
			432		160.9	182.5	187	185.1	194.9
			433		160.8	181.6	185.8	184.7	195.7
			434		161.2	182.4	186.2	184.9	195.1
			435		160.9	182	186.1	184.3	194.8
			436		160.7	182.5	186.9	184.5	195.7
			437		161.4	182.5	186.3	185.8	195.9
			438		160.9	182.7	186.6	184.9	195.4
			439		161.2	182.3	186.5	184.7	194.6
			440		161.3	182.2	186	184.9	195
			441		161.2	183.2	185.5	184.4	194.6
			442		161.9	182.4	187.2	184.3	195.9
			443		161.5	181.4	187.1	184.9	195.7
			444		161.8	182.1	186.6	184.2	195.6
			445		161.9	181.3	186.2	184	194.6
			446		161.1	182.4	186.6	184	195.6
			447		161.2	182	186.5	183.1	195.1
			448		162.2	181.3	186	184.7	196.6
			449		161.5	182.6	186.8	184.6	195.1
			450		161.5	181.3	186.2	183.1	196.6
			451		162.3	181.6	186.1	183.8	194.8
			452		161.5	182.2	186.4	183.8	195
			453		161.9	181.5	186.6	184.5	195.7
			454		162	182.4	187.1	184	195
			455		162.3	183.5	186.3	184.1	195.1
			456		161.8	182.1	185.7	183.5	194.2
			457		162.2	181.1	184.9	183.9	196
			458		162.2	183.5	186.4	183.5	195.1
			459		162.3	182.3	186.1	184.9	194.3
			460		162.3	181.8	186.3	183.7	194.9
			461		162.3	182.3	185.8	184.1	195.1
			462		162.8	181.9	185.7	184.4	194.8
			463		162.1	182.8	186.1	183.6	195.2
			464		162.5	181.6	186.3	185.9	195.3
			465		162.6	182	186.3	184.1	194.7
			466		162.5	182	184.8	184.1	195
			467		163.4	182.6	185.8	184	195.3
			468		161.4	181.1	185.4	183.1	194.5
			469		163	182.9	185.6	183.9	195.2
			470		162.2	182.4	186.3	183.9	195.2
			471		162.8	182	185.7	183.8	195.2
			472		162.6	182.2	185.5	184.4	195.8
			473		162.6	181.3	186	185.6	195
			474		162.4	181.8	185.9	183.3	195.7
			475		163.2	181.7	186.2	183.2	195.2
			476		162.9	181.9	185	183.7	195.1
			477		162.6	181.2	185.7	184.4	195
			478		163.4	181.5	185.7	183.8	195.2
			479		162.7	183.4	185.7	184.1	195.4
			480		163.2	182.5	185.8	183.7	194.7
			481		163.2	181.9	185.9	183.5	196.7
			482		162.5	182.2	186	183.5	195.1
			483		164	182.1	184.9	184	195.6
			484		163.2	182.3	185.6	183.2	193.7
			485		163.3	183.2	185	183.8	194.9
			486		163.3	181.7	185.4	183.2	194.5
			487		164.3	182.3	185.8	183.6	194.5
			488		164.1	183.1	185	183.7	196.1
			489		163.3	182.2	185.6	183.4	193.9
			490		163.9	182.1	184.8	185	195
			491		163.7	182.9	185.5	183.5	195.5
			492		163.1	181.6	184.6	183	194.4
			493		163.5	182.4	185.9	183.6	194.6
			494		163.3	181.9	185.1	183	194.1
			495		163.9	181.2	185.2	182.8	193.7
			496		163.1	181.8	185.7	183.1	194.1
			497		163.1	182.4	185.6	183.8	193.8
			498		163	182.6	185.6	183.8	194.6
			499		163.1	182.8	185.6	183	194.3
			500		164.5	182	185.7	183.1	194.5
			501		163.7	182	185.4	183.7	194
			502		163	182.4	185.1	183.3	193.6
			503		163.6	182.5	186.3	183.5	194.1
			504		164.1	181.5	185.6	183.5	194.6
			505		164.1	181.8	185.4	182.9	194.9
			506		162.9	183.7	184.9	182.9	194.1
			507			181.7	185.8	183.3	194.3
			508			183.6	185.4	183.5	194.3
			509			182.3	185.4	183.1	194.7
			510				185.5	183.2	194.7
			511					182.9	193.8
			512					183.1	193.2
			513						193.6
			514						195
			515						194.2
			516						194.3
			517
			518
			519
			520
			521
			522
			523
			524
			525
			526
			527
			528
			529
			530
			531
			532
			533
			534
			535

## Sheet: Figure 2D
	Time(s)	0.01 nM	1uM	2uM
	0	82.49	76.89	79.3
	1	83.14	77.2	78.58			TG concentrition		10nM TG			100nM TG			1μM TG			2μM TG
	2	82.67	77.17	78.58					-0.0184	-0.0164	-0.0288	-0.0299	-0.0012	-0.0636	-0.1578	-0.199	-0.1469	-0.3803	-0.3383	-0.244
	3	82.09	76.62	78.84
	4	82.15	77.17	78.83
	5	82.41	77.47	78.79
	6	82.11	76.95	78.9
	7	81.9	76.47	78.45
	8	83.26	76.62	78.27
	9	82.5	76.59	78.63
	10	82.37	76.58	78.58
	11	82.14	77.44	78.56
	12	82.97	76.8	78.31
	13	82.58	76.96	78.14
	14	82.29	76.79	78.58
	15	82.41	76.91	78.45
	16	81.96	77.05	78.38
	17	82.07	76.53	78.22
	18	83.08	77.2	78.3
	19	81.75	77.21	78.59
	20	81.59	76.06	78.48
	21	81.53	76.65	78.44
	22	82.08	75.84	78.02
	23	82.05	76.49	77.71
	24	81.28	76.41	78.05
	25	82.04	76.08	78.24
	26	82.36	76.6	77.89
	27	81.73	76.64	77.99
	28	81.75	76.17	77.72
	29	82.56	76.15	78.02
	30	82.43	76.63	77.78
	31	81.64	76.75	77.88
	32	82.11	76.07	77.55
	33	81.83	76.11	77.28
	34	82.28	76.31	78.5
	35	82.01	76.18	77.93
	36	81.71	76.55	77.56
	37	82.05	76.42	77.49
	38	81.69	76.3	77.12
	39	81.77	76.29	76.95
	40	82.45	76.46	77.79
	41	82.26	76.09	77.68
	42	81.24	75.98	77.27
	43	81.37	75.59	77.66
	44	81.85	77.04	77.39
	45	81.86	76.43	77.31
	46	81.81	76.64	77
	47	81.53	76.13	77.01
	48	81.16	75.83	76.67
	49	81.96	76.61	393.7*
	50	81.82	378.4*	305.3*
	51	81.77	98.09*	84.82
	52	81.38	80.75	81.53
	53	81.64	80.59	83.15
	54	429.6*	82.25	84.96
	55	100.1*	84.97	88.57
	56	85.43	88.01	92.49
	57	86.03	91.78	97.06
	58	86.97	97.93	101.9
	59	87.57	100.8	105.3
	60	89.39	104.8	109.8
	61	91.34	108.2	112.1
	62	94.18	110.2	115.4
	63	97.6	114.2	118.6
	64	100.9	117.1	120.9
	65	105	119.2	122.8
	66	109.2	121.1	125.7
	67	112.1	123.9	127.8
	68	115.4	125.3	129.7
	69	118.1	128.1	132.2
	70	121.8	130.2	134.2
	71	124.1	131.9	135.1
	72	126	132.7	137
	73	128.5	135	138
	74	130.7	136.1	140.2
	75	133.5	138.7	142.3
	76	135.6	140.1	143.2
	77	137.5	141.4	144.5
	78	138.8	142.1	145.2
	79	141	143.1	146.7
	80	142.5	144.1	147.6
	81	144.1	146.2	148.4
	82	146.1	145.9	149.7
	83	148.7	147	150.3
	84	148.1	148.7	151.7
	85	150.4	148.9	152.3
	86	151.1	149.9	152.4
	87	153.2	150.7	153
	88	154.1	151.5	153.3
	89	155.4	151.2	154.6
	90	157.6	152.5	155.5
	91	156.6	152.1	155.7
	92	157.8	153.7	156.6
	93	159.2	154.4	158.1
	94	159.7	154.3	157.4
	95	161.5	154.7	158.6
	96	161.4	156	159
	97	162.5	156.1	159.3
	98	164.1	156.5	159.1
	99	164.1	156.5	159.1
	100	164.6	158.4	160.8
	101	164.9	157.3	160.9
	102	165.8	157.6	160.5
	103	166.1	158.5	160.5
	104	166.7	157.8	161
	105	167.8	158.4	161.7
	106	168	158.9	162.4
	107	168	159.3	161.3
	108	168.3	159.6	162.1
	109	168.7	159.1	162.4
	110	169.2	160.4	163.2
	111	170.5	160.6	162.9
	112	170.4	161.5	163.7
	113	170.6	160.9	163
	114	171.2	160.9	163.4
	115	172	160.9	163.3
	116	172	161.2	164
	117	173	160.6	164.6
	118	172.9	161.3	164.3
	119	172	162.1	164
	120	172.6	162.6	164.2
	121	173.4	162.1	164.7
	122	173.7	161.7	165.3
	123	173.3	161.8	164.3
	124	174.6	162.9	164.6
	125	173.6	163.4	164.8
	126	174.3	163.5	165.9
	127	175	162.4	165.4
	128	174.3	163.6	165.2
	129	174.8	163.8	165.6
	130	175.4	162.9	166.3
	131	174.7	164.4	166.6
	132	176.6	164.1	165.1
	133	175.4	164	166.6
	134	176.9	163.8	166.5
	135	177.3	163.1	167.2
	136	176.8	164.9	166
	137	176.6	164.1	166.1
	138	176.1	164.6	166.2
	139	176.6	166.1	166.7
	140	176.5	164.6	166.4
	141	176.7	165.1	166.9
	142	178.3	165.2	166.2
	143	177.1	164.7	166.7
	144	177.4	164.6	166.3
	145	177.8	164.7	166.6
	146	176.4	164.6	166.4
	147	178	165.3	166.6
	148	178.1	164.9	167.1
	149	177.5	165.2	167.3
	150	177.2	165.3	167.2
	151	178.3	165.5	166.8
	152	177.8	165.7	166.8
	153	178.1	166.1	167
	154	178.3	166.4	168
	155	178.5	165.6	167.1
	156	179.4	166.1	167.8
	157	178.7	166	167.9
	158	178.6	165.9	167.7
	159	178.2	167.1	167.2
	160	178.6	166.6	169.1
	161	178.9	165.7	167.4
	162	177.7	164.7	166.8
	163	178	166.3	167.6
	164	179.2	165.6	167.5
	165	179.2	166.4	167.4
	166	179.6	167.7	167.2
	167	179.2	166.5	167.3
	168	178.6	166.7	167.5
	169	179	166.6	168
	170	178.6	166.5	167
	171	179.6	166.1	167.6
	172	179.7	166.5	167.6
	173	179.2	167	167.9
	174	179.4	165.8	167.9
	175	179.4	166.6	168.2
	176	179.8	166.6	167.3
	177	179.1	167	167.8
	178	180.4	167	167.4
	179	180.8	166.6	167.5
	180	179.4	166.7	167.5
	181	179.5	166.7	167.2
	182	182	167	167.1
	183	180.4	167.4	168.4
	184	179.9	168.1	168.3
	185	180.3	166.9	167.6
	186	179.7	167.1	167.9
	187	180.5	166.1	168
	188	180.8	166.8	168.8
	189	180.1	167.1	167.9
	190	179.7	166.1	168.1
	191	180.5	166.4	167.8
	192	179.9	167.6	168.3
	193	180.3	166.9	167.8
	194	179.8	167.5	168
	195	180.5	167.3	167.8
	196	180.5	167.6	168.8
	197	180.1	166.6	167
	198	180.8	167.2	167.6
	199	180.4	166.9	167.8
	200	181	167.5	167.6
	201	181.4	167.6	167.7
	202	180.8	168.1	168.2
	203	181	166.9	167.9
	204	181.2	167.1	167.9
	205	180.5	167	167.9
	206	180.1	168.1	167.3
	207	180.3	166.9	167.7
	208	181	167.1	168
	209	182.1	167.2	168.2
	210	181.1	167.3	167.6
	211	180.8	167.5	167.4
	212	180.6	167.7	167.4
	213	180.5	167.6	167.7
	214	181.1	167.9	168.2
	215	181.9	167.6	167.8
	216	180.8	167	167.7
	217	180.6	168.3	167.8
	218	181.3	167.6	168.1
	219	180.6	167.3	167.3
	220	182.5	166.7	168
	221	181.4	167.5	167.3
	222	181.1	168.2	168
	223	181.1	167.5	168.2
	224	180.5	166.7	167.3
	225	180.9	168.1	167.6
	226	180.8	168.7	167.3
	227	181.6	167.2	168.2
	228	181.2	167.8	167.9
	229	180.9	167.2	168.6
	230	180.7	168.2	167.9
	231	180.5	166.8	167.2
	232	180.7	167.5	167.4
	233	180.6	167.8	166.8
	234	180.4	167.8	167.3
	235	180.8	167.6	168
	236	181.1	166.5	168.9
	237	181.9	167.2	168.2
	238	180.8	168.9	167.8
	239	181.1	167.5	168
	240	181	167.7	167.4
	241	180.3	166.8	168.1
	242	181.2	167.6	166.9
	243	180.4	167.9	167.8
	244	181.4	167.9	167.8
	245	180.3	168.1	167.2
	246	180.9	167.7	167.8
	247	181.3	167.8	167.4
	248	180.9	168.8	167.6
	249	180.6	167.9	167.4
	250	180.7	167.2	185.9*
	251	181	168.1	1690*
	252	199.5*	1073*	198.2*
	253	894.7*	516.4*	168.6
	254	193.9*	174.9*	167.8
	255	180.9	169.1	167.1
	256	180.1	167.7	166.7
	257	179.9	167.3	166.3
	258	182.1	167.8	166
	259	181.1	168	165.4
	260	180.5	167.6	165.7
	261	180.4	167.7	165.5
	262	179.8	167	164.6
	263	180.2	166	163.6
	264	179.5	166.8	163.8
	265	180.2	165.7	164.4
	266	180.7	167.3	163.4
	267	179.7	165.6	162.5
	268	179.9	166.4	162
	269	179.8	165.6	162.4
	270	179.9	164.7	161.4
	271	180.4	165.8	160.9
	272	180.1	165.5	161
	273	181.3	165.8	160.6
	274	180.4	164.9	159.9
	275	180.4	166.1	160.3
	276	180.8	164.1	159.5
	277	180.4	164.6	158.4
	278	181	165.3	159
	279	180.1	164	158.2
	280	180.3	164.7	157.5
	281	179.9	164.2	157.1
	282	179.8	163.8	157.1
	283	180.1	163.8	157.3
	284	180.6	163.8	156.8
	285	179.6	164.1	157.3
	286	180.6	164.9	156.5
	287	180.3	163.2	156.8
	288	179.5	163.1	155.7
	289	179.7	163	156
	290	180.6	163.3	154.9
	291	179.5	163.3	154.3
	292	179.5	163.4	154.6
	293	179.9	162.8	154
	294	180.7	163.1	153.2
	295	180.1	161.7	153.2
	296	179.6	163.1	154.4
	297	180	162.3	153.6
	298	180.9	161.5	152.4
	299	180.5	162.5	153.1
	300	180.3	162.8	152.8
	301	179.8	161.8	152.2
	302	179.6	162.1	151.3
	303	179.5	161.2	151.5
	304	179.9	162.2	151.6
	305	179.8	161.9	150.9
	306	179.7	161.7	150.9
	307	179.8	161.3	150.2
	308	179.6	161.7	149.1
	309	179.9	160.9	148.8
	310	179.6	161.3	149.7
	311	179.4	160.7	149
	312	179.8	161.2	147.7
	313	179.5	160.8	147.4
	314	180.7	160.6	147.2
	315	179.5	160.5	147
	316	179.9	160	145.4
	317	179.2	160.4	146.7
	318	179.9	159.8	146.3
	319	180	160	145.4
	320	180.5	160.6	145.4
	321	179.2	160.2	144.6
	322	179.9	159.8	144.6
	323	179.5	159.7	144.4
	324	180.1	158.8	143.5
	325	181	159.3	143.9
	326	178.8	159.2	143.3
	327	179	161	142.1
	328	180.2	158.2	142.3
	329	179.6	158.2	141.8
	330	179.1	158.4	141.8
	331	179.5	159	140.8
	332	179.8	158.3	140.6
	333	179.3	158.4	140.7
	334	179.5	158.2	140.9
	335	178.9	158.1	139.8
	336	179	158.4	139.5
	337	179.2	157.5	138.7
	338	179.5	157.9	138.7
	339	178.7	158.1	137.2
	340	179.5	157.4	137
	341	179.9	157.4	136.9
	342	179.5	156.8	136.9
	343	179.3	157.2	136.3
	344	178.9	156.7	136.2
	345	179.4	157.4	136.5
	346	178.6	157.3	135.3
	347	178.2	155.8	135
	348	178	157.3	134.5
	349	179.9	155.8	134.3
	350	181.2	154.9	133.5
	351	178.8	155.8	133.2
	352	179.5	155.4	133.6
	353	179	155.5	132.5
	354	178.7	155.7	132.2
	355	179.2	154.7	131.8
	356	178.4	154.8	130.5
	357	178.4	155.6	131.1
	358	180.2	155.4	130.8
	359	178.1	154.8	130.6
	360	179.1	154.5	130.1
	361	178.3	155	129.8
	362	179.2	154.3	129.4
	363	178.7	154.6	129.3
	364	178.5	154	128.8
	365	178.7	154.3	128.7
	366	178.4	153.8	126.9
	367	179.1	153.3	126.7
	368	179	153.1	127.3
	369	178	153.7	126.1
	370	178.7	152.7	125.3
	371	179.2	152.2	127
	372	177.8	152.6	125.9
	373	177.6	152.5	125.7
	374	178.8	153.1	124.4
	375	179.6	152.6	124.8
	376	178.5	151.1	123.6
	377	179.1	151.7	123.7
	378	178.3	151.5	123.1
	379	178.1	151.8	124.2
	380	177.9	150.9	123
	381	178.2	151.6	122.8
	382	179	150.7	121.6
	383	177.9	150.7	121.6
	384	178.6	151	121.7
	385	178.3	150.8	122
	386	178.5	150.3	120
	387	177.7	149.9	120.4
	388	179	150	119.3
	389	178.3	150.5	119.2
	390	177.3	149.6	119.3
	391	177.9	149.4	118.6
	392	178.1	149.7	118.9
	393	177.6	150.2	118
	394	178.1	148.6	118
	395	178.5	148.6	117.6
	396	179.2	149.1	117.7
	397	179.1	148.5	117.2
	398	178.3	148.8	116.8
	399	177.4	147.3	115.8
	400	178.1	147.9	116
	401	177.9	147.7	115.4
	402	177.2	147.8	115
	403	177.1	147.6	115.5
	404	177.8	146.9	114.2
	405	178	147	114.3
	406	177.8	146.8	114.9
	407	177.8	147.3	113.5
	408	178.6	147.2	113
	409	177.4	147.7	113.5
	410	178	146.6	113.4
	411	177.8	146.7	111.7
	412	177.8	146.1	113.5
	413	178.2	145.1	111.1
	414	177.2	145.4	110.8
	415	177.6	145	112
	416	178	145.4	111.1
	417	178.2	145.3	111.1
	418	178	143.8	110
	419	177.8	145	110.1
	420	178.4	144.3	110.6
	421	177.3	144.1	110.3
	422	177.7	143.3	110.3
	423	177.9	144.6	109.3
	424	178.4	143.3	109.4
	425	177.2	144	108
	426	178.8	143.6	107.8
	427	177.1	143.2	107.7
	428	177.6	143.6	107.9
	429	178.1	142.7	107.4
	430	177.7	143.7	107.1
	431	177.5	143	106.9
	432	177.4	142.1	106.7
	433	177.3	141.7	106.1
	434	177.2	142.7	105.4
	435	176.8	142	106.2
	436	177.6	140.7	105.9
	437	176.9	141.1	105.7
	438	177.4	140.9	105.1
	439	176.6	141.2	104.4
	440	177.5	139.9	105.5
	441	177.1	140	104.7
	442	176.8	141.2	104.1
	443	177	140	103.5
	444	177.1	140	103.4
	445	176.9	139.4	103.3
	446	176.8	139.9	102.5
	447	176.4	139.5	102.6
	448	177	139	102.9
	449	176.3	139.1	102.6
	450	176.7	138.7	102.4
	451	176.5	138.3	101.9
	452	176.9	138.9	101.3
	453	176.9	138.1	101.6
	454	177.3	137.4	101.2
	455	177.6	137.8	101.1
	456	177.1	137.5	100.7
	457	176.9	136.5	100.5
	458	176.9	136.6	99.59
	459	177.2	136.4	100.5
	460	176	136.9	100.1
	461	177.2	136.9	99.81
	462	179.1	136.2	99
	463	176.8	135.5	98.24
	464	177	135.9	99.21
	465	176.3	135.6	98.84
	466	179.1	134.8	98.31
	467	176.8	135.3	98.23
	468	176.9	133.9	98.54
	469	177.3	134.1	97.78
	470	176.3	135.1	97.73
	471	177.3	134.2	97.53
	472	176.1	133.8	96.85
	473	176.3	133.7	97
	474	175.4	133.4	96.96
	475	176.1	133	96.54
	476	176.2	132.6	96.38
	477	176.1	133.4	96.79
	478	175.7	131.8	95.55
	479	175.9	133.2	95.86
	480	175.8	132.2	95.54
	481	176.7	132.3	95.24
	482	176.8	132.3	94.99
	483	176.7	132.5	95.25
	484	176	131.2	94.94
	485	176.8	130.7	95.15
	486	176.5	129.9	94.49
	487	176.4	130.1	93.98
	488	175.6	129.8	94.19
	489	176.3	129.9	94.3
	490	176.9	130.3	93.5
	491	176.1	129.4	93.25
	492	176.4	130.2	93.87
	493	175.8	130	93.37
	494	175.6	129.5	93.01
	495	176.1	129.3	92.98
	496	176.1	128.6	92.66
	497	175.7	128.6	92.92
	498	176.5	128.5	92.19
	499	174.7	129.9	92.47
	500	175.9	127.5	92.52
	501	175.9	127.1	91.49
	502	175.4	128	92
	503	176.1	127.5	91.57
	504	175.6	126.5	91.88
	505	175.7	127	91.27
	506	176.4	126	91.54
	507	176.1	125.7	91.08
	508	174.7	126.5	90.64
	509	175.5	126	90.68
	510	176.2	126.5	90.46
	511	176.3	125.1	90.96
	512	175.7	124.9	90.07
	513	175.2	125.8	89.61
	514	176.2	124.9	90.39
	515	175.7	124	90.35
	516	175.4	122.9	89.33
	517	175.8	124.7	89.42
	518	175.5	124.1	89.41
	519	176	123.1	88.65
	520	175.3	123	88.58
	521	175	123.9	88.76
	522	175.6	122.6	88.7
	523	175	122.6	88.55
	524	175.8	121.8	88.77
	525	175.4	122.4	88.9
	526	174.4	122	88.45
	527	177.3	122.3	87.2
	528	175.5	121.5	87.98
	529	175.1	120.9	88.19
	530	174.4	120.9	87.72
	531	174.9	121.1	87.58
	532	174.4	121.8	86.98
	533	174.9	120.3	87.08
	534	174.8	120.1	86.88
	535	174.2	119.7	87.28
	536	174.9	120	86.83
	537	175.1	119.2	86.5
	538	175.1	119.7	86.37
	539	175	119.8	88.08
	540	175.4	118.2	86.98
	541	174.8	119.4	86.21
	542	175	117.6	86.06
	543	174.1	118.6	85.71
	544	174.5	118.8	85.27
	545	174.5	118.9	85.26
	546	174.7	117.8	85.36
	547	175.4	117.6	85.58
	548	175.1	116.7	85.07
	549	175.1	117.3	85.72
	550	175.5	116	84.63
	551	174.1	117.1	85.31
	552	174.1	117	84.93
	553	175.2	116.6	84.8
	554	174.3	115.8	85.79
	555	174.7	115.8	84.79
	556	174.7	116.1	85.46
	557	175.2	116.4	84.45
	558	175.1	115.1	84.04
	559	174.9	115.1	84.67
	560	174.9	115	84.36
	561	174.2	113.7	84.19
	562	173.8	114.6	84.77
	563	174.5	114.7	84.17
	564	174.6	114.6	84.19
	565	174.4	114.7	83.54
	566	174.2	114.2	83.19
	567	174.6	113.3	83.45
	568	174.1	113.6	83.77
	569	173.8	113.3	82.82
	570	174.1	113	83.24
	571	173.8	113.9	82.92
	572	174.1	111.9	83.03
	573	174.2	111.9	82.93
	574	174	111.7	83.13
	575	173.9	112	82.94
	576	174.8	111.6	82.89
	577	173.8	111.4	82.9
	578	173.7	111	82.5
	579	174.5	111	82.01
	580	174	111.1	82.4
	581	174.7	112.2	82.4
	582	173.9	110.5	81.9
	583	174.2	110.9	81.92
	584	174.6	110.1	82.87
	585	174.2	111.4	81.99
	586	174.4	109.6	82.38
	587	176	109.7	81.2
	588	173.6	109.4	81.83
	589	173.6	110.5	81.46
	590	173.5	109.4	82.08
	591	174.1	109.5	81.98
	592	173.7	109.2	81.37
	593	173.6	108.8	81.51
	594	174.2	108.1	81.68
	595	173.7	109.7	81.11
	596	175.1	108.2	80.88
	597	173.5	108.5	80.86
	598	173.6	107.6	80.98
	599	173.7	107.6	80.83
	600	174.1	108	80.45
	601	173.3	108.4	80.83
	602	174.2	107.5	80.7
	603	173.5	106.6	80.46
	604	174.3	106.8	80.55
	605	173.8	106.7	80.64
	606	175.6	106.2	80.57
	607	173.3	106.9	80.71
	608	173.6	106	80.43
	609	173.1	106.1	79.93
	610	172.9	106.7	80.26
	611	174	106.1	79.87
	612	173.1	105	80.31
	613	173.5	106	79.72
	614	172.9	105.4	80.16
	615	176	105.3	80.39
	616	173	105.5	79.64
	617	173.3	104.4	79.94
	618	174.1	104.6	79.74
	619	173	104.2	80.29
	620	173.3	103.9	79.09
	621	173	104	79.87
	622	173.2	103.7	79.64
	623	174.5	103.5	79.45
	624	173	103.4	79.46
	625	173	103.5	79.64
	626	172.8	103.2	79.33
	627	173.6	103.2	79.39
	628	173.4	102.3	79.3
	629	172.8	103.2	79.97
	630	173.2	102.8	79.14
	631	171.9	102.4	79.25
	632	172.3	102.7	79.51
	633	172.5	102.2	79.13
	634	172.9	102.4	79.5
	635	172.5	101.9	78.6
	636	172.3	102	78.94
	637	172.1	101.7	77.93
	638	172.8	101.6	79.25
	639	172.5	101.4	79.12
	640	172.4	101	78.83
	641	172.6	101.5	78.27
	642	172.5	101.4	78.46
	643	172.7	100.9	78.91
	644	172.8	100.6	79.03
	645	172.6	99.94	78.4
	646	172.1	99.97	78.49
	647	173.1	100	78.39
	648	172.6	99.43	78.24
	649	172.1	99.3	77.46
	650	171.9	98.85	78.8
	651	173	99.64	78.14
	652	172.8	99.09	77.93
	653	172.4	99.46	78.4
	654	172.5	99.24	78.17
	655	172.5	98.73	78.62
	656	172	98.57	78.15
	657	172	98.53	77.53
	658	171.7	98.44	77.5
	659	172.9	99.13	78.43
	660	171.9	98.25	77.79
	661	172.4	98.52	77.82
	662	171.6	97.13	77.98
	663	172	98.56	77.81
	664	172.5	98.33	77.5
	665	171.1	97.52	77.46
	666	171.8	98.15	77.34
	667	171.7	97.89	77.57
	668	172.4	96.82	77.39
	669	172.2	97.28	76.93
	670	171.6	97	77.79
	671	171.6	97.28	77.41
	672	172.1	96.44	77.64
	673	170.8	97.18	77.27
	674	172.5	96.83	77.12
	675	171.7	96.88	76.72
	676	172.1	97.58	77.4
	677	172.6	96.07	77.06
	678	172.4	96.54	77.29
	679	171.6	95.48	77.56
	680	171.8	95.49	76.78
	681	171.9	96.31	77.56
	682	171.5	97.45	77.18
	683	171.1	95.25	76.48
	684	173.1	95.27	76.53
	685	171.8	95.76	77.29
	686	171.1	95.14	76.7
	687	172.5	94.63	76.57
	688	170.7	94.86	76.68
	689	171.4	95.17	76.42
	690	171.8	94.52	76.78
	691	171.6	94.23	77.19
	692	171.4	94	76.75
	693	171.3	93.76	76.79
	694	171.3	94.09	76.4
	695	171.3	94.42	76.47
	696	171.8	94.51	76.9
	697	172.3	94.31	76.16
	698	171.5	93.85	76.26
	699	171.5	94.17	76.29
	700	171.9	93.52	76.81
	701	171	93.27	76.79
	702	171.4	93.89	76.87
	703	171.1	93.24	76.65
	704	171.5	93.52	76.25
		171.3	93.85	76.53
		171.4	93.1	76.05
		172.1	93.02	75.97
		171.3	93.28	76.53
		171.3	92.73	75.77
		171.1	92.91	76
		171	92.86	75.92
		171.1	93.28	76.37
		171	92.1	76.14
		171.4	92	75.76
		171.2	92.25	76.38
		170	92.09	75.72
		170.1	91.97	76.47
		171.3	93.16	76.54
		171.8	92.3	75.52
		170.9	92.05	75.45
		172	91.66	75.51
		170.7	92.2	75.87
		172.2	91.51	75.78
		171.5	91.46	76.15
		171.4	91.24	76.16
		171.2	91.35	76.23
		172.8	90.62	76.47
		170.3	91.26	76.12
		170.6	90.71	76.28
		171.4	91.09	75.79
		170.8	90.95	75.76
		170.8	90.73	75.37
		170.5	90.92	75.64
		171	90.28	75.88
		170.8	90.76	75.33
		170.2	89.64	74.83
		170.2	90.91	75.05
		170.4	90.27	75.18
		172.6	90.05	75.01
		170.9	90.01	75.09
		171	90	75.79
		170.5	90.24	75.4
		170.9	89.29	75.08
		171.1	90.22	75.61
		169.9	88.92	75
		170.1	89.65	75.3
		170.5	89.09	75.61
		171.5	89.86	75.33
		170.3	89.7	75.48
		170.5	89.55	74.73
		169.8	89.08	75.48
		171.6	89.36	75.23
		170.9	89.26	76.08
		170.2	89.17	75.07
		170.7	89.41	74.84
		170	88.32	74.92
		170.6	88.77	74.82
		169.9	89.25	75.15
		170.8	88.77	75.34
		170.4	88.87	75.13
		170.5	88.89	75.31
		169.7	88.82	75.04
		169.8	88.44	74.81
		170.8	87.98	74.32
		169.7	88.25	74.94
		169.9	88.02	74.61
		170.7	88.26	74.29
		170.7	87.48	74.72
		169.9	88.26	74.84
		169.7	88.62	74.78
		170.6	88.5	74.79
		169.8	87.13	74.36
		170.5	87.28	74.96
		170.2	88.21	74.59
		170.1	88.03	74.61
		170.8	87.54	74.72
		170.2	87.77	74.42
		170.3	87.44	75.06
		169.9	87.4	75.11
		170	88.42	74.69
		169.9	87.42	74.32
		170.4	87.24	74.07
		170.4	87.02	75.31
		170.5	87.63	74.65
		169.8	87.57	74.42
		169.9	87.01	74.5
		170.2	86.78	74.45
		169.3	87.45	74.03
		169.6	87	73.98
		169.8	87.12	74.87
		169.5	87.27	74.92
		169.8	86.75	74.24
		169.8	86.5	75.41
		169.4	86.42	74.61
		169.1	86.32	75.22
		169.6	86.28	74.07
		170	86.73	74.25
		169.7	86.37	74.86
		170.1	86.2	75.21
		170.4	87.26	74.17
		169.8	85.89	74.25
		169.4	85.71	74.44
		168.6	85.87	74.25
		168.9	85.64	73.9
		170.5	86.53	73.76
		168.9	86.15	73.96
		169.1	85.6	74.7
		170	85.86	73.81
		169.2	85.89	74.66
		169.3	85.74	74.35
		169.1	85.91
		168.9	85.43
		169	85.77
		169.9	85.87
		169.7	84.78
		169.5	85.52
		169.2	86.46
		169.8	85.17
		169.8	85.77
		169.4	85.25
		170.1	85.67
		170.2	85.8
		169.2	85.04
		169.3	85.12
		169	85.22
		170	85.39
		169.1	85.13
		169.2	84.88
		169.3	85.03
		169.1	85.17
		169.7	84.92
		169	85.11
		168.9	85.06
		168.2	85.19
		168.7	84.95
		169	85.17
		171	85.46
		168.3	84.67
		169.3	84.89
		168.5	84.31
		169	84.32
		168.7	84.44
		168.9	84.82
		169.6
		168.9
		168.2
		168.6
		169.1
		169
		168.9
		168.6
		168.6
		167.7
		168.4
		168.5
		169.4
		169.5
		168.8
		167.7
		169.2
		168.2
		168.7
		168.8
		169.6
		168.5
		169.2
		169.4
		168.7
		168.1
		167.9
		167.9
		168.7
		168.9
		168.5
		168.5
		168.6
		168.9
		168.7
		168.1
		169.9
		168.8
		168.2
		168.9
		167.8
		168.2
		168.8
		168
		167.6
		168.2
		167.9
		168.1
		168.6
		168.9
		168.9
		168.4
		168
		168.9
		168.3
		167.7
		168.3
		168
		167.7
		168.4
		167.7
		167.2
		168.1
		168
		168.1
		169.1
		167.3
		167.6
		166.8
		167.3
		166.8
		168.4
		168.5
		167.3
		167.9
		168.1
		167.5
		168
		168.6
		167.5
		167.7
		166.9
		167.4
		167.2
		167.1
		166.9
		167.8
		167.8
		167.5
		167.7
		167.5
		168.6
		167.2
		166.6
		167.6
		167.1
		167.9

## Sheet: Figure 2E
Time(s)		1nM IO	10nM IO	100nM IO	1000 nM IO
0		96.48	97.51	91.06	86.49
1		95.72	97.18	89.4	85.92		IO concentrition		1nM IO			10nM IO			100nM IO			1μM IO
2		96.19	97.1	89.84	86.99				-0.1231	-0.1862	-0.2496	-1.0755	-1.4191	-0.6925	-4.5204	-4.2401	-4.4253	-4.2043	-3.4916	-4.2001
3		96.47	97.23	89.57	87.07
4		97.09	96.65	89.43	87.03
5		96.24	96.78	89.46	86.24
6		95.79	97.22	89.42	86.24
7		95.81	97.52	89.28	86.58
8		96.51	97.18	89.02	87.5
9		96.82	97.6	89.88	86.36
10		97.45	97.12	89.4	86.19
11		95.29	97.1	89.91	87.3
12		95.42	97.51	88.82	86.75
13		95.53	97.82	89.71	87.49
14		96.52	97.42	89.49	86.23
15		95.87	96.74	89.15	86.66
16		95.98	96.91	89.26	87.01
17		96.14	97.2	89.03	86.84
18		95.91	97.09	89.82	86.41
19		95.95	96.66	89.22	86.4
20		95.84	97.2	88.67	87.31
21		95.93	96.57	88.92	85.43
22		96.22	96.92	89.59	84.81
23		95.41	97.26	88.4	86.45
24		96.19	97.14	88.97	86.02
25		96.51	96.44	89.01	86.1
26		95.78	97.63	89.26	87.05
27		95.45	97.1	89.22	85.96
28		95.15	97.16	88.8	87.38
29		95.55	97.28	89.41	86.38
30		96.14	96.63	88.32	85.92
31		95.41	96.42	89.42	86.13
32		95.93	95.85	89.2	86.05
33		96.21	95.82	88.86	86.54
34		95.21	97.09	88.24	85.6
35		95.64	97.09	87.97	86.51
36		95.34	97.15	88.74	85.95
37		95.26	96.54	88.73	85.18
38		95.49	96.74	88.56	86.45
39		94.82	96.71	89.26	86.57
40		96.24	96.89	89.3	86.28
41		94.82	96.72	88.36	85.75
42		95.15	96.46	88.87	86.31
43		95.91	96.7	87.71	86.59
44		95.02	95.91	89.1	86
45		94.87	96.39	88.03	85.87
46		95.25	96.27	88.04	85.42
47		94.84	96.32	88.95	85.93
48		95.27	95.89	88.92	85.52
49		94.82	97.16	89.05	85.18
50		96.07	96.48	88.91	86.09
51		94.39	96.88	87.84	85.74
52		95.22	96.05	88.21	85.83
53		94.79	96	88.54	85.43
54		95.11	96.06	88.65	85.27
55		94.94	96.48	590.9*	462.1*
56		94.39	96.19	578.7*	452.3*
57		94.62	96.42	100.7*	95.17*
58		94.61	96	91.59	89.77
59		94.78	442.9*	93.24	90.04
60		94.72	566.3*	93.34	91.61
61		93.64	112.5*	95.06	92.55
62		95.05	100.4	96.28	94
63		95.02	100.2	98.04	96.24
64		95.19	102.2	100.6	99.63
65		94.6	103	102.6	102.1
66		94.38	104.9	105.7	105.8
67		95.31	107.1	109.5	108.8
68		95.01	111.3	112.8	112.4
69		94.77	113.4	116.7	114.5
70		248.8*	117.4	119.8	118.3
71		116.2*	120	122.3	121.2
72		97.91	123.8	125.7	124.2
73		98.4	127.5	127.1	127.6
74		99.25	130	129.9	129.5
75		101.8	133.7	133	132
76		102.1	136.9	135.1	134
77		105.3	139.3	138.9	136.2
78		107.8	141.2	139.9	138
79		111.6	145.6	142.6	141.4
80		114.8	147.2	143.3	143.7
81		119.3	149.4	146.2	144.6
82		122.5	151.2	149.2	145.6
83		124.8	154	149.8	147.7
84		129	156.7	151	150.4
85		132.4	158.7	152.7	150.6
86		134.6	159.3	153.6	152.9
87		138	162	155	154
88		142.3	163	157.8	154.7
89		144.4	166.1	159	156.5
90		145.5	167.8	159.4	157.1
91		148.2	169.1	160.6	159.5
92		151.4	169.9	161	159.5
93		153	172.4	163.7	160.4
94		155.2	174.5	164.9	161.1
95		157.7	174.1	164.5	162.2
96		158.4	176.2	166	162.6
97		160.4	177.3	167.9	164.4
98		162.8	178.9	168.8	166.2
99		164	179.8	168.3	166
100		164.9	180.8	171	166.5
101		166.8	181.6	170.7	166.8
102		169	181.2	172.4	167.3
103		169.4	183.2	171.6	167.5
104		170.6	183	172.9	168.9
105		172.9	184.3	172.4	169.1
106		174.2	184.8	173.9	172
107		175.2	184.9	173.6	171.4
108		175.8	186.1	175.1	170.6
109		176.6	186.6	175.3	171.4
110		178	189.2	175.9	172.9
111		178.5	188.5	176.6	173.3
112		179.5	187.6	177.2	172.9
113		180.7	191.2	176.8	174.4
114		180.8	190.9	177.1	174.3
115		180.5	190.5	177.1	175
116		181.7	192.2	177.3	175
117		181.9	192	179.2	175.2
118		182.7	192.7	178.4	176.5
119		184.1	191.3	179.8	175.5
120		185.1	191.8	180.5	176.1
121		185.8	193.6	178.9	175.8
122		186.5	193.4	180	177
123		186.9	193.5	180.5	177.2
124		187.5	193.6	181.3	177.8
125		187.3	195.2	182	178.3
126		188.1	196.4	181.6	177.3
127		188.1	196.5	182.2	178.2
128		189.7	196.4	182.6	178.7
129		188.9	197.1	182	178.1
130		190.2	196.1	184.1	179.1
131		190.6	197.6	184.6	180
132		192.3	197.4	183.4	178.2
133		190.8	198.5	185.8	180
134		190.8	197.4	183.4	179.3
135		193.2	199.6	185.2	180.1
136		191.2	197.7	182.6	179.8
137		193.2	198.8	186.8	180.8
138		193.8	198.4	186	180.4
139		192.3	198.9	185	180.6
140		193.9	200.1	185.2	181.4
141		193.7	200	184.8	181
142		193.8	199	184.9	180.5
143		194.8	200.4	185	181.9
144		194.7	200.3	187.2	181.7
145		195	199.3	186.8	180.9
146		195.2	200.1	186	181.3
147		195.6	200.7	186.2	183
148		196.2	200.3	186.3	182.2
149		195.3	200.9	185.9	182
150		196.4	200.6	186.9	182.1
151		194.9	200.8	187	182.1
152		197	201.5	187.7	182.8
153		196.6	203.3	187.4	182.9
154		197.6	202.8	187.2	182.8
155		197	202.9	189.1	182.3
156		197.9	202.5	187.1	182.9
157		198.2	202.3	187.9	182.5
158		197.4	202	188.1	183.2
159		197.8	202.7	186.6	182.7
160		196.6	202.6	187	183.5
161		197.9	202.3	186.9	183.4
162		197.4	202.1	187.3	184.6
163		197.9	202.1	188.1	182.6
164		198.2	202.4	188.7	183.9
165		198.3	202.8	189	183.3
166		197.7	203.8	187.6	184
167		198.2	203	188.1	183.9
168		199.1	202.6	188	184.3
169		198	204.3	189.1	184
170		197.2	203.3	188.9	183.9
171		199.3	203.6	189.8	183.8
172		199.3	203.8	190	184.8
173		199	203.5	188.9	184
174		198.9	204.8	189.7	184.1
175		199.5	203.8	189	184.3
176		199	204.7	188.8	186.4
177		200.5	204.7	187.7	184.4
178		199.5	203.8	188.2	184.9
179		201.1	204.6	188.7	184.3
180		200.2	203.4	188.7	184.3
181		199.3	204.6	190.4	185
182		200.6	204.2	190.3	183.9
183		202.4	204.7	189.7	185.5
184		200.4	204.8	189.9	185.5
185		199.6	204.1	189.1	186
186		199	204.8	190.3	185.4
187		199.9	204.4	188.8	184.7
188		200.4	203.8	188.8	185
189		200.1	204.9	189.4	184.2
190		200.3	205.1	192.4	185.4
191		200.8	205.1	190.5	185.9
192		201.5	204.2	191.3	185.3
193		200.5	204.8	189.7	185
194		203.2	205.4	190	184.7
195		201.9	205.5	188.7	186.4
196		200.7	205.4	189.7	185.8
197		201	205.3	190	185.7
198		201.4	205.3	189.9	185
199		200.8	205.6	190.3	185.6
200		202.3	206.3	191.7	185.4
201		201.7	204.5	189.6	186
202		201.6	205.5	190.8	185.7
203		202.2	205.8	190.2	184.7
204		201.6	205.8	189.8	185.4
205		201.6	204.9	190.4	184.9
206		202.5	207.4	191	186.5
207		201.2	205.1	189.1	186.2
208		202.3	205.3	191.5	186.1
209		203.4	205.5	189.7	185.9
210		200.9	205.3	191.7	187
211		201.9	204.8	190.8	186.9
212		202.1	206.4	191.8	186.3
213		201.1	206	190.2	184.4
214		201.7	206.1	190.1	186.9
215		201.6	205.8	190.7	185
216		202.3	206.2	192.8	184.3
217		203	206.3	190.8	186.4
218		202.9	206.9	191.9	185.4
219		203.4	205.6	190.2	186.4
220		201.9	205.8	191.1	186.2
221		203.1	207.1	190.7	186.1
222		202.7	205.2	191.6	185.3
223		202.2	206.6	190.9	185.3
224		203.2	205.3	193.2	185.7
225		201.9	208.7	190.8	185.8
226		202.2	205.6	191.8	186
227		202	205.3	191	186.4
228		202.9	205.5	190.2	185.5
229		203.8	206.7	191.8	186.4
230		202.6	206	190.1	186.1
231		203.1	206.3	190.7	187.2
232		201.3	205.7	191.6	187.1
233		202.4	206.2	191.5	185.7
234		203.5	207.4	190.1	186.2
235		203.7	206.9	191.2	186
236		203.8	205.9	190.6	186.2
237		202.2	206.3	191.1	185.6
238		203.7	206.9	189.7	186.5
239		203.2	206	190.7	186.9
240		203.9	207.1	191.5	185.6
241		203.2	206.4	191.7	186.4
242		203.4	207	190.6	187.2
243		202.8	205.7	191	185.1
244		202.1	206.9	190.7	186.8
245		202.9	207.1	191.8	186.8
246		202	206	191.4	185.6
247		202.1	205.8	191.2	185
248		202	205.3	192.3	186.1
249		203.9	207.4	191.6	186.6
250		202	206	191.7	187
251		202.9	205.3	190.8	186.4
252		202.1	205.6	190.8	187
253		204.3	206.3	191.3	185.6
254		1661*	205.3	191.3	186
255		272.7*	206.1	190.8	185.5
256		204.1	205.2	350.1*	682.6*
257		201.8	205.7	200.4*	713.6*
258		203.1	220*	186.7	180.1
259		203.2	479.4*	176.3	137.1
260		202	210.3*	167.9	109.5
261		202.2	204	158.3	93.72
262		200.9	203.3	151	84.4
263		201.5	201.3	141.6	76.66
264		201.2	199.3	135	72.86
265		200.7	198.7	127.5	72.62
266		200.5	197.5	122.9	69.93
267		201.2	196.1	119.8	69.5
268		200.7	194.5	114.9	69.22
269		198.7	193	112.1	66.02
270		200.5	190.7	109	65.18
271		199.6	189	106.4	65.21
272		198.9	187.4	103.4	64.34
273		200.1	185.8	102.8	64.7
274		199.4	183.9	102.1	63.59
275		198.7	182.9	101.7	62.24
276		199.2	182.6	99.13	63.27
277		200	182	96.85	62.92
278		199	179.1	97.61	62.42
279		199.9	179.2	97.17	62.25
280		198.2	177.8	96.87	61.84
281		197.8	177.2	97.17	61.27
282		196.8	175.1	96.74	60.56
283		198.1	175.6	94.16	60.86
284		198.7	174.5	93.75	59.75
285		197.8	173.8	94.13	60.81
286		197.4	174.5	93.6	59.92
287		196.4	172	92.39	59.6
288		199	171.7	91.79	59.22
289		198.1	170.2	92.04	58.98
290		196	170.4	92.13	58.37
291		196.1	170.5	91.11	59.25
292		197.2	169	91.23	58.08
293		195.5	168.4	91.17	59.25
294		195.9	168.9	90.76	59.15
295		196.4	168.7	91.68	58.04
296		195.4	166.8	91.03	57.75
297		195.3	168.7	90.87	58.17
298		193.9	166.2	90.35	57.79
299		196.9	167.7	89.63	57.9
300		196	166.8	89.85	57.69
301		195.3	166.3	89.16	57.59
302		196.2	166.4	88.95	57.19
303		195.6	164.9	88.81	56.61
304		195.6	165.1	89.3	56.08
305		195.1	164.8	89.01	56.48
306		195.2	164.7	88.3	56.99
307		194.3	164.6	89.02	56.67
308		195.4	164.4	87.95	57.04
309		194.6	166.4	89.69	56.64
310		193.9	163.3	88.39	56.46
311		194.2	163.8	87.76	56.59
312		193.5	163.2	87.55	56.33
313		194.6	162.5	87.47	55.29
314		192.5	163.3	88.04	56.84
315		192.7	162.1	87.84	55.43
316		193.9	162.1	87.9	55.8
317		192.8	161.9	87.17	55.86
318		192.4	161.7	86.84	55.05
319		193.9	162	86.33	55.01
320		192.3	161.4	87.98	55.31
321		194.1	162.5	85.94	55.56
322		193.6	161.5	86.39	55.35
323		192.6	161.1	86.48	55.03
324		191.9	161.1	86.4	55.17
325		192.2	162.5	85.89	55.01
326		192.7	161.2	85.88	55.17
327		190.7	161.5	85.55	55.31
328		192.7	160.2	86.45	55.1
329		192.3	159.2	85.45	54.6
330		192.7	159.5	85.48	54.18
331		191.2	161.6	84.98	54.43
332		192.3	160.9	85.84	54.47
333		191.6	160.1	85.93	53.68
334		191.8	160.2	85.67	53.94
335		191.4	160.5	84.76	53.88
336		191.6	161.9	85.1	54.15
337		191.6	159.9	85.08	54.43
338		191.6	159.7	83.82	53.81
339		192.5	159.7	84.81	54.93
340		191	160.6	84.71	53.8
341		190.6	159.3	85.35	54.33
342		190.8	160.3	84.91	54.5
343		192.9	159.3	83.45	54.36
344		192.1	158	84.65	54.9
345		189.4	159.6	84.71	52.94
346		191.4	158.9	84.78	53.07
347		189.6	159.4	83.72	52.43
348		190.9	158.3	84.73	52.7
349		190.1	159.1	84.58	53.58
350		191.3	158.6	84.54	53.49
351		190.6	158.8	83.67	52.76
352		190.5	158.2	83.5	53.07
353		189.8	158.5	83.4	53.28
354		190.8	159.1	84.34	52.48
355		190.7	158	84.31	52.54
356		190.6	157.8	83.73	52.93
357		190.5	158.7	83.44	52.84
358		189.7	158.5	83.02	52.6
359		189.6	158.3	83.52	52.46
360		190.8	158.2	83.44	53.16
361		190.5	158.4	82.91	52.55
362		189.7	157.3	82.7	52.62
363		190.5	157.2	83.34	52.32
364		190.1	157.7	83.24	52.46
365		189.4	156.7	83.13	53.39
366		189.1	157.3	83.05	52.35
367		190.1	157.7	83.4	52.35
368		190.5	158.8	83.31	53.08
369		189.6	156.7	82.66	52.35
370		189.3	156.5	82.89	52.28
371		189	156.7	82.5	51.69
372		189.2	156.2	82.09	52.04
373		189.3	156.3	82.52	51.59
374		189.9	157	82.5	52.83
375		189.7	156.3	82.77	52.39
376		189.7	157.3	82.27	52.14
377		188.8	157.3	81.85	51.85
378		189.2	155.7	82.56	51.48
379		187.6	156.5	81.99	51.29
380		188.6	156.6	82.69	52.41
381		189	156.1	82.66	51.69
382		187.7	156.1	81.33	52.35
383		188.2	156.8	81.68	51.8
384		188.1	155.7	82.44	51.89
385		188.8	156.6	81.82	52.07
386		188.2	155.9	82.58	51.55
387		188.2	156.6	81.42	51.27
388		187.1	155	82.59	51.23
389		188.3	155.5	81.47	51.51
390		187.2	155	81.02	51.61
391		188.4	155.5	80.92	51.34
392		188.8	155.2	81.14	51.78
393		188.3	155.3	81.11	52.13
394		187.8	155.7	81.47	51.37
395		188.3	156.2	81.9	52.46
396		187.1	155.7	80.88	51.8
397		188.6	156	80.45	51.54
398		187	154.8	81.24	51.36
399		188.2	155.9	81.3	51.67
400		187.7	154.5	81.52	51.9
401		187	155.2	80.9	51.65
402		188.1	155	81.14	51.99
403		187.1	155	81.13	50.65
404		187.6	155.6	80.67	50.63
405		186.4	155.7	81.02	50.9
406		187.8	156.2	81.51	50.96
407		185.8	153.5	80.91	51.62
408		187.1	155.1	81.57	51.19
409		187.1	153.9	80.96	51.2
410		187.4	154.4	80.93	50.7
411		187.1	154.6	80.66	50.74
412		186.4	154.5	80.56	51.35
413		187.8	154.5	80.78	51.03
414		187.4	155.1	80.7	50.85
415		186.6	154.6	81.06	51.21
416		186.6	154.6	80.17	51.04
417		187.3	153.6	80.31	50.42
418		188.4	154.4	81.09	51.21
419		187.9	154.4	79.94	51.22
420		186.9	154.7	80.2	50.16
421		186.7	154.2	80.16	50.98
422		185.8	153.8	79.57	50.35
423		187	155.3	80.49	50.96
424		187	154.5	79.81	50.03
425		186.5	153.8	80.34	51.05
426		186.2	153.2	80.43	50.54
427		186.1	153.5	80.59	50.52
428		186.3	154.4	80.17	49.96
429		185.9	154.2	79.25	50.28
430		186.2	153.8	80.69	52.01
431		187.3	153.5	79.53	50.88
432		186.8	153.7	80.85	50.95
433		186	153.7	79.6	50.35
434		186.7	153.2	79.36	50.17
435		186	153.7	80.64	50.68
436		186.3	153.7	80.04	50.74
437		186.3	153.2	79.95	49.99
438		185.2	153	80.38	50.07
439		185.8	152.6	80.05	50.64
440		185.7	153.2	79.77	50.56
441		186	152.1	80.59	49.94
442		184.6	154.8	79.84	50.35
443		187	153.1	79.86	51.08
444		185.3	152.2	79.18	50.6
445		184.9	152.6	79.57	50.19
446		185.1	153	80.11	50.33
447		186.3	152.4	79.87	50.57
448		185	153.1	79.25	49.72
449		186.6	153.3	79.22	49.68
450		185.6	152.6	78.89	50.18
451		184.2	153.3	78.8	50.43
452		186.1	153.5	79.18	51.3
453		184.6	153	79.45	50.37
454		186	152.4	78.77	49.68
455		186.3	151.4	79.48	49.65
456		185.2	152.4	79.58	49.72
457		184.8	153.1	79.46	49.93
458		185	152.1	78.71	49.25
459		185.3	151.4	79.02	50.23
460		184.9	152.3	78.25	49.51
461		184.5	151.1	78.97	49.47
462		185.7	152.2	78.81	50.24
463		185.8	152.6	78.83	49.56
464		184.3	152.6	78.4	50.32
465		184.8	152.1	79.82	49.47
466		185.4	152.5	78.67	49.62
467		184.8	152.1	80.07	49.45
468		185.1	152.8	79.55	49.37
469		184.6	152.7	79.43	49.46
470		184.7	152.1	79.07	49.77
471		185.4	152.1	78.81	50.02
472		185.4	151	78.16	49.64
473		184.5	152	78.84	50.35
474		184.7	151.6	79.13	49.79
475		184.4	151.6	79.13	50.08
476		184.7	151.3	78.89	50.66
477		183.9	151.8	79.61	50.05
478		183.3	152.5	78.41	49.87
479		184.3	152.4	78.35	50.17
480		183.5	151.9	79.23	49.73
481		184	152.8	78.16	49.61
482		184.9	151.6	78.71	49.41
483		183.9	151.2	78.23	49.71
484		184.8	150.6	78.77	49.52
485		185.2	151.5	78.48	49.9
486		183.6	152.3	78.34	49.21
487		183.9	150.9	78.29	48.94
488		184.5	151.5	79.67	48.87
489		184.1	150.7	78.99	49.35
490		183.2	151.7	78.49	49.9
491		184.2	152.1	77.43	49.08
492		184.5	152.4	77.82	49.48
493		183.3	150.6	78.32	50
494		183.8	151.6	77.99	49.59
495		183.5	150.1	77.55	49.07
496		183.1	149.8	78.87	50.72
497		185.1	150.4	77.66	49.52
498		185.3	151.5	78.47	49.32
499		183.7	150.2	78.47	49.55
500		182.8	151.7	78.75	48.9
501		184.1	151.3	78.48	49.22
502		184.1	151.3	77.3	48.9
503		182.7	150.8	78.44	49.41
504		184.1	151.2	79.3	49.22
505		183.4	150.5	78.38	49.89
506		184.6	150.9	77.43	49.42
507		183.6	150.7	77.79	49.31
508		181.9	150.4	77.66	49.51
509		184.2	151	77.84	50
510		182.7	150.7	78.24	49.21
511		183	151.7	78.27	49.24
512		183.4	151.6	78.1	48.88
513		184.6	151	77.81	48.9
514		182.9	150.4	78.04	49.04
515		183.3	150.1	77.67	48.65
516		183.4	149.6	78.33	48.58
517		183.4	149.5	77.63	49.18
518		184.7	150.1	77.68	48.46
519		183.2	151.4	78.02	49.49
520		183.1	150	77.5	48.77
521		183.9	150.7	77.85	48.38
522		184.3	149.8	77.16	48
523		182.9	149.8	77.74	48.99
524		183.9	150.3	77.06	49.29
525		183.6	150.7	77.74	48.92
526		181.9	149.4	76.95	49.04
527		183.8	149.8	77.02	48.83
528		182.6	150.5	78.14	48.15
529		183.5	150.4	77.48	49.12
530		182.6	150.2	77.46	48.9
531		182.9	149.3	77.43	48.31
532		182.3	150.6	77.53	49.55
533		184	149.6	76.66	48.59
534		182	149.2	77.27	49.15
535		183	150.8	77.58	47.82
536		182.3	150.1	76.96	48.86
537		182.3	149.5	77.39	48.7
538		183.1	149.7	77.02	48.91
539		181.5	149.1	76.24	49.07
540		183.6	149.5	77	48.36
541		183.5	149.8	77.33	48.78
542		183	148.8	77.46	48.73
543		183.2	148.3	76.66	49.69
544		182.7	148.8	77.46	48.25
545		182.5	149.6	76.69	48.31
546		183.6	149.9	76.81	49.53
547		182.1	148.4	77.1	49.04
548		182.9	148.6	77.12	49.95
549		181.9	149.9	76.95	48.31
550		182.4	148.8	77.64	48.52
551		181.8	150	77.41	49.33
552		181.4	149	76.97	49.16
553		182.2	149.2	77.1	49.12
554		182.6	149.6	76.59	48.63
555		181	148.8	77.41	48.24
556		181.3	149	76.93	48.38
557		182	148.2	77.31	48.84
558		182	148.2	77.08	48.91
559		181.5	149.5	77.12	48.75
560		182.1	149.4	77.06	48.63
561		182.4	149.7	76.77	48.52
562		182.3	148.7	76.61	47.96
563		181.9	148.2	76.8	49
564		182.1	149.1	77.16	48.63
565		181.7	149.4	77.18	49.25
566		181.9	149.2	76.97	48.79
567		181.8	147.4	76.35	48.47
568		182.3	148.6	76.58	47.77
569		183.1	149	77.01	48.38
570		181.6	148.6	76.37	48.87
571		182.4	148.6	76.64	48.76
572		181.5	148.1	76.82	48.19
573		182.2	148	76.83	48.86
574		182.4	149.4	76.31	48.66
575		181.1	148.7	76.5	48.2
576		181.8	148.3	76.23	48.29
577		181.9	147.8	76.87	47.92
578		181.5	148.5	76.6	48.48
579		180.8	147.8	77.15	47.82
580		181.9	147.9	77.25	48.51
581		181.1	146.6	76.58	48.55
582		182.3	147.7	75.93	48.79
583		182.3	147.4	76.78	48.24
584		182.2	147.2	77.11	48.56
585		181.3	148.6	75.92	48.34
586		180.3	148	76.11	48.29
587		180.7	147.8	76.09	48.18
588		182.8	147.7	76.46	47.48
589		180.6	147.7	76.18	47.77
590		182.2	149.1	76.3	47.88
591		181.2	148.3	77.55	48.15
592		180.8	147.6	76.64	48.19
593		180.8	147.1	76.7	48.57
594		179.9	147	76.41	47.82
595		180.6	148.1	76.69	48.81
596		181.7	147.2	75.71	49.44
597		180.6	146.3	75.29	47.9
598		180.9	148.4	75.1	48.22
599		181.9	146.6	76.35	47.5
600		180.4	147.6	75.9	47.6
601		181	147.6	75.71	48.46
602		182.3	146.8	76.22	47.9
603		180.5	147.6	76.22	48.59
604		181.4	147.8	76.08	47.7
605		181.3	146.3	75.45	48.05
606		181	147.8	77.04	48.17
607		181.1	146.6	76.18	47.97
608		180.7	147.1	76.24	47.88
609		180.6	146.8	76.12	48.03
610		181.5	147.3	75.46	47.76
611		180.3	146.8	76.27	48.55
612		180	147.5	75	47.81
613		179.9	148.2	75.84	47.77
614		180	146.7	76.91	48.04
615		180.7	147.3	75.12	48.3
616		180.7	147.3		48.23
617		181.3	147.1		48.25
618		181.1	146.4		49.03
619		179.5	147.2		48.36
620		181.2	146.6		47.53
621		179.6	147.9		48.33
622		180.3	146.6		47.74
623		179.4			49.24
624		179.9			48.48
		180.1			48.07
		179.1			47.37
		180.3			48.23
		181.2			47.13
		180.5			47.79
		180.9			48.53
					48.4
					48.16
					47.73
					47.32
					47.71
					47.64
					48.03
					47.95
					47.8
					47.78
					47.41
					48.47
					48.58
					48.06
					48.13
					47.28
					47.66
					48.17
					48.38
					47.96
					48.08
					48.11
					47.24
					47.77
					47.35
					47.95
					47.85
					47.04
					47.99
					47.94
					47.65
					47.82
					47.21
					47.52
					49.15
					48.02
					47.19
