# Supplementary material for: Calcium transfer from the ER to other organelles for optimal signaling in Toxoplasma gondii
Source: eLife. 2025 Nov 12;13:RP101894. doi: 10.7554/eLife.101894 (PMC12611264; doi:10.7554/eLife.101894)
Supplement: Figure 3—source data 1. [file elife-101894-fig3-data1.xlsx]

## Sheet: Figure 3D
		TatiDKu80 + Atc				iDTgSERCA -ATc				iDTgSERCA + ATc
		0.555	0.562	0.581		0.532	0.546	0.56		0	0	0

## Sheet: Figure 3E
			ATc 24h			No-ATc
			Mean	Std		Mean	Std
		1	39.3378	6.1059		0.945845	0.263608
		2	55.8935	8.00087		29.4524	4.4036
		4	4.76875	4.10154		45.9967	3.92412
		8	0	0		23.0906	1.55489
		16	0	0		0.969655	0.369165

## Sheet: Figure 3F
		-ATc			+ATc
		4.313	4.449	4.256	1.551	1.7272	1.7451
		24h			48h
		1.551	1.7272	1.794	1.692	1.693	1.75

## Sheet: Figure 3G
			Invaded				Attached
		TatiΔKu80	6.14035	6.30483	6.43275		6.14035	4.11184	5.84795
		TatiΔKu80 + ATc	6.37958	5.67596	5.84795		5.11696	5.15996	5.84795
		iΔSERCA	6.43275	6.57895	6.37958		5.26316	4.38596	5.58214
		iΔSERCA + ATc	1.46199	1.8797	2.74123		7.30994	6.89223	9.64912

## Sheet: Figure 3H
														Saponin
	48h 100 nM Ion						24h 50 nM Ion							No ATc	24h ATc
	No ATc	+ATc					No ATc	+ATc						214	60
	98.5075	1.2987					96.7391	1.2987						218	64
	93.6508	2.46914					94.7368	2.46914						242	72
	90.5	22.3684					79.7297	22.3684						300	80
														304	84
														312	92
														320	100
														540	104
														540	108
														540	60
														552	88
														552	72
Natural egress														576	84
No ATc				With ATc										572	304
21.2121	20	25		6.66667	7.14286	0								624	420
														596	540
														604
														616
														624
														644
														664
														664
														684
														708
