# Supplementary material for: Calcium transfer from the ER to other organelles for optimal signaling in Toxoplasma gondii
Source: eLife. 2025 Nov 12;13:RP101894. doi: 10.7554/eLife.101894 (PMC12611264; doi:10.7554/eLife.101894)
Supplement: Figure 4—source data 1. [file elife-101894-fig4-data1.xlsx]

## Sheet: Figure 4A
	Time(s)	With ATc		No ATc
	0	102.222		95.92			With ATc					No ATc
	1.6	102.831		96.178			103.109	117.32	96.6038	112.482		244.097	353.318	231.346	270.114
	3.2	103.591		95.423
	4.8	104.393		95.028
	6.4	106.328		96.69
	8	106.014		98.145
	9.6	105.683		100.207
	11.2	105.217		100.342
	12.8	105.787		99.285
	14.4	105.098		98.702
	16	105.674		99.758
	17.6	105.49		101.879
	19.2	103.62		101.911
	20.8	101.614		102.441
	22.4	102.67		102.963
	24	104.794		103.653
	25.6	106.697		104.643
	27.2	107.411		104.785
	28.8	107.437		101.657
	30.4	105.813		100.238
	32	105.802		99.971
	33.6	106.029		101.693
	35.2	106.003		103.352
	36.8	105.765		105.323
	38.4	106.198		104.849
	40	103.614		103.877
	41.6	103.984		103.493
	43.2	105.445		105.442
	44.8	105.873		105.92
	46.4	106.92		105.803
	48	107.302		103.355
	49.6	105.429		103.217
	51.2	105.776		103.731
	52.8	104.74		107.083
	54.4	105.698		110.085
	56	106.626		109.935
	57.6	107.566		107.51
	59.2	107.76		108.294
	60.8	108.362		106.524
	62.4	107.398		106.168
	64	108.982		104.276
	65.6	107.214		102.589
	67.2	107.021		103.237
	68.8	107.111		107.274
	70.4	108.344		111.083
	72	109.311		112.072
	73.6	109.268		109.125
	75.2	107.588		107.202
	76.8	109.308		105.889
	78.4	109.81		105.864
	80	110.757		107.269
	81.6	111.39		106.652
	83.2	110.063		106.278
	84.8	108.017		108.248
	86.4	109.032		109.426
	88	109.676		111.218
	89.6	111.974		114.211
	91.2	112.621		114.912
	92.8	111.017		113.289
	94.4	107.028		113.553
	96	104.062		112.404
	97.6	103.005		113.213
	99.2	105.188		114.516
	100.8	107.659		112.891
	102.4	109.93		111.488
	104	110.683		112.98
	105.6	108.41		115.071
	107.2	106.93		115.996
	108.8	108.353		118.505
	110.4	109.801		117.013
	112	110.491		117.367
	113.6	109.998		115.72
	115.2	107.419		115.555
	116.8	106.498		113.032
	118.4	105.784		113.107
	120	105.571		111.346
	121.6	105.042		111.576
	123.2	103.731		113.987
	124.8	105.16		117.421
	126.4	108.566		118.649
	128	110.779		118.931
	129.6	112.767		118.004
	131.2	112.055		114.636
	132.8	110.811		113.934
	134.4	111.106		115.433
	136	110.928		115.277
	137.6	111.366		116.031
	139.2	110.714		117.811
	140.8	109.235		117.413
	142.4	108.859		115.093
	144	109.049		114.594
	145.6	109.732		114.943
	147.2	110.846		116.337
	148.8	111.976		118.506
	150.4	110.625		120.955
	152	108.071		120.293
	153.6	107.241		117.486
	155.2	108.343		116.004
	156.8	110.339		117.289
	158.4	112.096		117.929
	160	109.802		120.036
	161.6	109.605		122.504
	163.2	108.088		122.22
	164.8	110.112		121.05
	166.4	113.759		121.974
	168	113.467		122.109
	169.6	115.066		122.774
	171.2	116.571		123.004
	172.8	112.944		121.965
	174.4	111.205		122.026
	176	109.584		121.096
	177.6	108.877		119.766
	179.2	111.879		118.58
	180.8	111.422		117.86
	182.4	109.184		118.268
	184	109.04		119.498
	185.6	109.351		121.593
	187.2	111.652		122.701
	188.8	112.693		123.943
	190.4	112.791		124.566
	192	110.76		125.67
	193.6	110.772		122.513
	195.2	111.597		120.892
	196.8	111.262		121.157
	198.4	111.584		122.219
	200	112.829		124.106
	201.6	112.641		126.198
	203.2	112.194		125.236
	204.8	111.783		123.581
	206.4	110.114		120.327
	208	111.08		116.449
	209.6	114.886		114.777
	211.2	117.836		114.777
	212.8	124.14		120.087
	214.4	131.445		131.301
	216	137.961		145.628
	217.6	144.323		163.977
	219.2	153.301		183.168
	220.8	158.066		200.237
	222.4	165.537		217.608
	224	171.549		232.701
	225.6	175.198		240.686
	227.2	177.023		244.641
	228.8	181.716		252.314
	230.4	187.063		265.68
	232	194.897		282.044
	233.6	197.321		298.514
	235.2	197.245		301.07
	236.8	199.355		295.911
	238.4	202.543		303.968
	240	205.647		316.813
	241.6	208.81		327.441
	243.2	205.393		338.612
	244.8	200.724		340.503
	246.4	200.577		337.764
	248	202.094		348.06
	249.6	203.553		350.746
	251.2	203.462		351.664
	252.8	202.181		352.402
	254.4	203.486		350.618
	256	205.846		347.632
	257.6	207.649		353.139
	259.2	209.478		352.977
	260.8	207.863		357.446
	262.4	207.223		364.757
	264	207.978		368.365
	265.6	207.843		360.455
	267.2	209.358		351.747
	268.8	211.75		345.699
	270.4	213.916		343.545
	272	212.268		348.089
	273.6	208		355.874
	275.2	200.555		361.143
	276.8	197.732		359.801
	278.4	202.029		352.084
	280	205.915		345.552
	281.6	208.773		342.812
	283.2	209.5		338.873
	284.8	204.017		340.605
	286.4	198.216		338.911
	288	196.03		322.167
	289.6	193.773		314.891
	291.2	199.128		309.554
	292.8	199.995		309.661
	294.4	198.003		310.962
	296	192.191		311.564
	297.6	185.703		303.749
	299.2	180.114		303.197
	300.8	179.391		302.184
	302.4	177.371		306.046
	304	178.086		301.46
	305.6	177.718		298.054
	307.2	181.358		288.974
	308.8	179.788		280.104
	310.4	176.125		271.25
	312	173.478		273.527
	313.6	173.186		269.5
	315.2	171.978		267.902
	316.8	173.546		261.881
	318.4	168.758		257.831
	320	164.132		243.533
	321.6	164.198		239.278
	323.2	168.225		234.981
	324.8	170.478		235.592
	326.4	170.255		246.023
	328	167.83		255.289
	329.6	164.047		247.56
	331.2	161.234		239.394
	332.8	158.011		232.748
	334.4	155.25		224.758
	336	155.577		222.047
	337.6	159.771		217.438
	339.2	161.975		210.073
	340.8	162.941		209.84
	342.4	159.85		208.176
	344	155.566		206.097
	345.6	153.975		203.052
	347.2	152.895		199.544
	348.8	152.088		197.627
	350.4	150.856		200.303
	352	148.047		197.062
	353.6	145.3		193.608
	355.2	146.07		189.084
	356.8	146.919		185.88
	358.4	149.472		184.891
	360	151.638		185.112
	361.6	153.098		181.481
	363.2	154.356		175.781
	364.8	156.778		170.744
	366.4	153.675		168.695
	368	148.675		168.18
	369.6	146.696		171.618
	371.2	145.179		173.435
	372.8	144.485		174.251
	374.4	149.032		171.074
	376	150.115		168.308
	377.6	148.107		167.265
	379.2	148.83		167.682
	380.8	149.761		169.284
	382.4	150.363		165.494
	384	152.271		159.142
	385.6	153.931		155.362
	387.2	151.1		154.36
	388.8	147.776		153.374
	390.4	149.226		155.609
	392	152.643		154.708
	393.6	155.975		153.391
	395.2	159.118		155.031
	396.8	157.802		158.501
	398.4	155.83		158.706
	400	152.519		161.826
	401.6	145.512		162.805
	403.2	139.57		161.068
	404.8	139.491		157.805
	406.4	151.655		162.807
	408	184.49		162.623
	409.6	227.734		160.964
	411.2	273.887		159.878
	412.8	306.435		174.465
	414.4	320.559		205.138
	416	331.971		270.965
	417.6	347.491		351.795
	419.2	350.45		422.111
	420.8	355.056		449.921
	422.4	347.273		460.339
	424	332.079		462.3
	425.6	335.873		476.847
	427.2	341.677		487.84
	428.8	345.632		497.29
	430.4	353.456		484.382
	432	357.067		463.723
	433.6	348.069		452.962
	435.2	345.327		451.269
	436.8	340.803		448.715
	438.4	337.09		441.63
	440	337.827		433.843
	441.6	340.861		428.375
	443.2	341.811		433.888
	444.8	341.341		429.556
	446.4	337.66		423.659
	448	337.532		424.36
	449.6	338.835		428.866
	451.2	330.541		427.463
	452.8	330.306		444.106
	454.4	325.792		446.435
	456	324.015		454.482
	457.6	329.599		457.196
	459.2	329.176		442.919
	460.8	325.122		420.128
	462.4	329.137		407.987
	464	322.691		398.132
	465.6	324.944		398.36
	467.2	326.671		403.194
	468.8	320.01		408.153
	470.4	318.922		414.811
	472	321.908		419.032
	473.6	318		416.384
	475.2	317.833		412.417
	476.8	318.337		419.576
	478.4	314.861		426.113
	480	313.825		428.072
	481.6	313.44		419.62
	483.2	315.445		391.349
	484.8	315.299		377.859
	486.4	314.027		378.873
	488	306.922		384.569
	489.6	308.197		397.612
	491.2	312.485		407.432
	492.8	318.012		399.261
	494.4	314.876		397.617
	496	313.426		397.011
	497.6	312.839		401.001
	499.2	318.532		410.242
	500.8	321.363		412.109
	502.4	315.605		402.24
	504	311.006		397.229
	505.6	309.816		393.96
	507.2	310.346		401.384
	508.8	311.021		409.215
	510.4	307.111		407.148
	512	296.051		399.157
	513.6	297.34		400.573
	515.2	296.716		394.389
	516.8	302.252		390.305
	518.4	315.048		393.309
	520	326.009		392.551
	521.6	322.674		387.894
	523.2	321.36		383.814
	524.8	313.172		377.51
	526.4	309.139		376.428
	528	308.129		388.907
	529.6	309.757		401.719
	531.2	310.878		401.189
	532.8	311.482		398.889
	534.4	310.862		399.153
	536	308.216		392.142
	537.6	305.115		392.144
	539.2	302.902		403.563
	540.8	302.437		403.343
	542.4	302.157		406.24
	544	304.982		396.123
	545.6	306.268		380.998
	547.2	301.197		375.354
	548.8	299.996		388.072
	550.4	300.89		395.017
	552	304.899		396.072
	553.6	309.003		394.522
	555.2	312.47		395.623
	556.8	311.666		394.669
	558.4	314.871		402.215
	560	321.215		392.984
	561.6	318.499		377.15
	563.2	310.271		383.164
	564.8	299.886		394.68
	566.4	298.544		403.012
	568	300.743		417.667
	569.6	307.494		406.793
	571.2	306.41		394.705
	572.8	306.257		398.092
	574.4	299.849		401.864
	576	299.912		403.306
	577.6	302.945		403.58
	579.2	300.647		399.136
	580.8	297.973		392.959
	582.4	301.155		394.141
	584	299.909		402.056
	585.6	301.444		397.742
	587.2	303.314		398.325
	588.8	301.317		402.542
	590.4	302.29		406.789
	592	303.739		406.415
	593.6	302.663		402.863
	595.2	299.905		401.775
	596.8	296.921		414.721
	598.4	302.706		427.823
	600	305.93		434.769
	601.6	308.346		422.292
	603.2	309.591		404.807
	604.8	309.352		406.818
	606.4	309.871		406.733
	608	308.629		398.502
	609.6	301.763		390.187
	611.2	300.897		386.878
	612.8	304.443		389.41
	614.4	311.121		405.764
	616	314.384		411.194
	617.6	312.457		404.029
	619.2	306.677		400.516
	620.8	302.189		401.236
	622.4	301.835		400.892
	624	304.385		403.034
	625.6	311.397		405.139
	627.2	320.828		396.489
	628.8	323.702		392.79
	630.4	318.339		400.383
	632	311.481		401.627
	633.6	305.088		397.741
	635.2	320.632		398.812
	636.8	341.194		397.13
	638.4	270.066		397.048
	640	153.531		398.246
	641.6	74.242		396.681
	643.2	31.563		403.832
	644.8	12.358		410.751
	646.4	8.412		410.325
	648	8.475		401.304
	649.6	8.348		395.146
	651.2	7.976		393.047
	652.8	7.716		398.443
	654.4	7.251		402.364
	656	6.745		404.017
	657.6	6.053		410.443
	659.2	5.777		421.22
	660.8	5.73		427.278
	662.4	5.58		424.494
	664	5.132		414.278
	665.6	4.494		399.776
	667.2	3.492		400.95
	668.8	3.047		401.09
	670.4	3.667		402.845
	672	3.897		401.965
	673.6	4.373		399.518
	675.2	4.27		398.268
	676.8	3.437		413.435
	678.4	2.556		407.606
	680	2.095		397.601
	681.6	2.081		390.884
	683.2	2.952		391.76
	684.8	2.786		397.848
	686.4	2.82		407.869
	688	2.602		410.556
	689.6	1.817		405.167
	691.2	2.106		405.849
	692.8	2.29		416.017
	694.4	1.943		417.596
	696	1.823		413.991
	697.6	1.779		443.458
	699.2	1.194		490.711
	700.8	1.132		328.024
	702.4	0.938		154.6
	704	0.938		63.426
	705.6	0.747		20.281
	707.2	0.381		3.129
	708.8	0.902		2.922

## Sheet: Figure 4B
	Time(s)		With ATc		No ATc
	0		99.323		90.068
	1.6		101.629		93.916			With ATc					No ATc
	3.2		103.573		98.537			138.651	135.021	146.107			410.523	455.809		440.257
	4.8		105.995		99.988
	6.4		106.023		99.255
	8		105.129		98.726
	9.6		103.358		99.65
	11.2		104.324		99.261
	12.8		103.164		100.65
	14.4		103.71		101.753
	16		101.336		101.06
	17.6		102.746		99.88
	19.2		104.272		99.532
	20.8		106.082		98.804
	22.4		105.494		101.85
	24		104.334		102.918
	25.6		101.384		101.88
	27.2		101.07		100.708
	28.8		100.07		102.123
	30.4		101.571		103.514
	32		103.225		105.672
	33.6		101.964		106.27
	35.2		100.298		106.22
	36.8		97.913		105.769
	38.4		95.435		105.591
	40		98.795		106.573
	41.6		102.677		106.611
	43.2		102.837		105.374
	44.8		102.447		101.953
	46.4		101.006		98.767
	48		99.968		98.228
	49.6		102.086		100.872
	51.2		103.783		103.992
	52.8		105.669		103.745
	54.4		105.292		102.233
	56		103.106		100.828
	57.6		102.344		99.429
	59.2		102.671		100.088
	60.8		103.089		104.414
	62.4		104.447		104.43
	64		104.037		106.007
	65.6		102.993		105.799
	67.2		102.815		104.194
	68.8		103.088		104.313
	70.4		103.425		104.98
	72		103.508		105.177
	73.6		103.639		107.318
	75.2		105.652		106.648
	76.8		106.076		108.174
	78.4		105.98		109.589
	80		104.779		110.517
	81.6		104.464		112.446
	83.2		104.525		112.871
	84.8		106.864		109.246
	86.4		107.741		106.463
	88		107.686		107.089
	89.6		105.025		109.899
	91.2		103.362		111.746
	92.8		101.094		113.21
	94.4		102.204		111.487
	96		103.848		109.403
	97.6		104.695		111.628
	99.2		103.691		111.693
	100.8		102.55		113.305
	102.4		101.8		112.883
	104		104.387		111.604
	105.6		106.593		110.872
	107.2		107.311		110.821
	108.8		105.586		108.981
	110.4		103.258		110.021
	112		101.964		109.768
	113.6		102.316		111.069
	115.2		103.642		112.786
	116.8		106.438		112.892
	118.4		108.218		111.459
	120		109.615		111.788
	121.6		108.687		113.049
	123.2		107.157		115.333
	124.8		104.192		116.458
	126.4		103.207		112.576
	128		102.269		108.391
	129.6		103.384		106.159
	131.2		106.189		108.908
	132.8		107.728		113.024
	134.4		108.003		116.206
	136		106.604		116.834
	137.6		104.968		116.24
	139.2		104.219		115.402
	140.8		105.733		117.43
	142.4		106.547		117.377
	144		106.635		115.65
	145.6		104.692		111.58
	147.2		103.457		110.459
	148.8		102.476		111.445
	150.4		102.295		112.958
	152		102.431		112.234
	153.6		102.783		111.066
	155.2		103.479		110.083
	156.8		104.863		110.697
	158.4		106.517		113.743
	160		105.357		115.319
	161.6		103.111		114.476
	163.2		103.538		115.283
	164.8		103.396		117.985
	166.4		105.188		117.044
	168		107.471		117.594
	169.6		106.252		116.903
	171.2		106.139		116.326
	172.8		107.473		115.925
	174.4		107.517		117.158
	176		107.463		118.2
	177.6		107.322		120.778
	179.2		103.802		119.896
	180.8		103.094		118.12
	182.4		103.351		115
	184		104.942		113.446
	185.6		104.86		112.483
	187.2		104.983		116.522
	188.8		103.546		113.966
	190.4		104.079		109.987
	192		105.137		108.492
	193.6		106.592		110.686
	195.2		106.327		113.679
	196.8		105.362		117.916
	198.4		103.668		116.695
	200		102.032		113.977
	201.6		101.931		113.365
	203.2		109.195		116.402
	204.8		121.662		116.139
	206.4		136.338		112.811
	208		146.604		109.67
	209.6		151.663		115.401
	211.2		148.994		126.987
	212.8		149.115		140.363
	214.4		147.854		147.545
	216		147.403		146.859
	217.6		145.403		139.287
	219.2		144.953		137.595
	220.8		142.144		135.915
	222.4		141.938		133.633
	224		141.97		133.882
	225.6		140.182		134.707
	227.2		137.843		135.471
	228.8		136.748		135.314
	230.4		135.089		131.989
	232		135.629		128.524
	233.6		137.998		127.629
	235.2		136.876		127.539
	236.8		137.435		127.488
	238.4		138.035		126.443
	240		137.749		125.093
	241.6		137.355		125.5
	243.2		136.509		128.935
	244.8		135.259		129.84
	246.4		134.487		128.353
	248		134.751		128.034
	249.6		134.797		123.189
	251.2		135.935		122.999
	252.8		136.176		123.86
	254.4		134.055		124.572
	256		132.082		127.008
	257.6		131.272		132.746
	259.2		131.397		129.679
	260.8		132.883		127.943
	262.4		133.456		124.54
	264		133.756		122.016
	265.6		135.078		123.045
	267.2		134.925		124.584
	268.8		136.476		126.827
	270.4		135.111		128.065
	272		133.38		128.385
	273.6		134.825		127.488
	275.2		136.769		126.422
	276.8		137.197		122.847
	278.4		136.108		122.953
	280		135.062		120.942
	281.6		134.636		119.143
	283.2		135.531		118.413
	284.8		136.759		120.287
	286.4		136.305		124.397
	288		133.461		126.928
	289.6		133.704		127.353
	291.2		136.049		127.583
	292.8		138.341		129.019
	294.4		138.921		129.951
	296		139.626		132.689
	297.6		140.106		132.231
	299.2		139.46		131.741
	300.8		141.209		132.935
	302.4		141.506		137.646
	304		138.627		136.393
	305.6		137.128		134.774
	307.2		137.613		132.877
	308.8		136.98		131.278
	310.4		138.602		131.015
	312		140.821		131.108
	313.6		141.616		127.735
	315.2		144.191		124.311
	316.8		145.462		125.028
	318.4		144.991		128.099
	320		143.523		133.881
	321.6		142.735		139.654
	323.2		143.815		143.389
	324.8		146.017		144.776
	326.4		147.851		142.62
	328		148.431		138.582
	329.6		147.717		135.735
	331.2		146.18		135.719
	332.8		145.394		136.78
	334.4		142.821		138.507
	336		144.139		138.717
	337.6		145.005		137.811
	339.2		145.463		138.931
	340.8		146.049		136.218
	342.4		146.593		132.965
	344		143.938		134.032
	345.6		143.99		132.221
	347.2		144.678		128.473
	348.8		145.465		128.905
	350.4		147.423		131.05
	352		149.128		133.509
	353.6		147.382		142.457
	355.2		146.842		144.663
	356.8		144.983		141.637
	358.4		146.017		139.171
	360		147.201		143.836
	361.6		147.399		145.01
	363.2		148.638		149.675
	364.8		148.89		148.936
	366.4		147.632		145.236
	368		148.199		140.437
	369.6		147.153		139.687
	371.2		147.955		139.711
	372.8		150.978		142.874
	374.4		148.884		144.626
	376		147.683		143.935
	377.6		147.304		143.571
	379.2		147.227		142.151
	380.8		149.642		137.946
	382.4		152.992		136.456
	384		154.058		136.48
	385.6		152.116		136.76
	387.2		151.523		143.643
	388.8		150.875		150.416
	390.4		148.525		151.428
	392		149.506		150.237
	393.6		151.157		145.051
	395.2		150.508		140.91
	396.8		150.843		141.89
	398.4		151.315		144.19
	400		151.59		146.428
	401.6		152.077		146.14
	403.2		153.056		145.501
	404.8		151.771		144.584
	406.4		149.072		150.493
	408		146.653		153.729
	409.6		148.387		153.795
	411.2		152.182		150.844
	412.8		159.719		146.834
	414.4		167.216		139.731
	416		175.821		140.345
	417.6		184.13		139.785
	419.2		192.667		140.931
	420.8		203.348		145.056
	422.4		208.834		152.057
	424		216.45		157.884
	425.6		227.184		163.88
	427.2		235.704		175.066
	428.8		237.755		192.684
	430.4		239.773		214.577
	432		240.305		241.425
	433.6		246.613		264.126
	435.2		254.122		269.832
	436.8		263.958		280.41
	438.4		266.851		294.82
	440		266.867		312.016
	441.6		269.297		335.737
	443.2		271.624		370.805
	444.8		268.894		391.55
	446.4		275.059		415.407
	448		278.936		432.528
	449.6		287.599		432.652
	451.2		292.287		445.225
	452.8		293.303		461.9
	454.4		288.023		470.934
	456		289.609		487.816
	457.6		285.48		480.908
	459.2		286.983		473.562
	460.8		280.199		485.924
	462.4		277.927		516.391
	464		279.462		543.395
	465.6		285.715		555.063
	467.2		286.869		559.177
	468.8		286.088		548.385
	470.4		280.502		533.892
	472		280.153		545.843
	473.6		282.183		548.948
	475.2		282.296		555.066
	476.8		281.092		588.69
	478.4		280.764		589.921
	480		280.646		591.139
	481.6		284.459		580.546
	483.2		285.376		566.123
	484.8		286.054		584.361
	486.4		283.259		605.047
	488		286.126		587.337
	489.6		282.47		575.122
	491.2		280.507		551.972
	492.8		282.121		535.11
	494.4		287.027		554.873
	496		291.519		560.633
	497.6		297.587		544.949
	499.2		294.874		546.447
	500.8		287.572		532.134
	502.4		285.772		546.27
	504		284.087		572.707
	505.6		283.641		565.631
	507.2		277.542		549.469
	508.8		275.325		539.46
	510.4		271.046		527.53
	512		272.206		536.87
	513.6		274.612		560.997
	515.2		273.843		544.966
	516.8		266.031		504.927
	518.4		260.05		483.282
	520		257.661		473.2
	521.6		261.659		466.361
	523.2		267.579		475.92
	524.8		272.972		475.414
	526.4		270.582		482.321
	528		263.908		499.325
	529.6		258.031		488.98
	531.2		253.458		478.772
	532.8		248.23		452.976
	534.4		248.942		425.387
	536		251.315		435.659
	537.6		250.414		448.243
	539.2		254.657		443.402
	540.8		255.386		437.618
	542.4		250.59		424.78
	544		246.347		399.25
	545.6		244.575		396.422
	547.2		236.267		393.995
	548.8		237.504		386.006
	550.4		238.316		374.208
	552		240.336		365.181
	553.6		243.179		350.779
	555.2		248.699		344.968
	556.8		245.642		340.303
	558.4		243.769		335.783
	560		239.47		329.187
	561.6		238.416		315.401
	563.2		237.505		304.378
	564.8		236.133		302.202
	566.4		229.832		298.687
	568		228.444		299.518
	569.6		230.907		303.139
	571.2		236.129		302.266
	572.8		238.145		298.203
	574.4		237.89		289.123
	576		234.37		279.914
	577.6		231.799		267.463
	579.2		232.05		254.253
	580.8		230.224		249.247
	582.4		230.137		248.211
	584		232.75		247.494
	585.6		234.508		249.76
	587.2		234.739		247.466
	588.8		233.584		245.211
	590.4		229.899		246.013
	592		229.13		244.989
	593.6		230.692		244.076
	595.2		232.163		239.027
	596.8		235.356		233.37
	598.4		237.999		232.708
	600		241.301		229.712
	601.6		240.024		224.978

## Sheet: Figure 4C
		No-ATc	ATc 24g	ATc-48h
	0	100.213	100.005	100.067			No ATc						ATc 24h									ATc 48h
	1.6	100.174	100.094	100.067			37.1	39.2	43.33	47.1			23.23	24.01	22.14	24.13	23.75	8.67	14.91	11.51		6.1	7.3	8.6	2.28
	3.2	99.8839	100.251	100.019
	4.8	99.9226	100.139	99.9466
	6.4	100	100.005	100.043
	8	100.058	100.184	100.043
	9.6	100.039	99.9156	99.9226
	11.2	99.9613	99.7369	100.019
	12.8	99.7485	99.6699	99.8745
	14.4	99.7098	99.4913	99.6581
	16	99.555	99.6476	99.8264
	17.6	99.5744	99.6923	99.8024
	19.2	99.6905	99.4466	99.6581
	20.8	99.6324	99.2903	99.61
	22.4	99.7098	99.3796	99.6821
	24	99.4196	99.6029	99.6821
	25.6	99.1294	99.7593	99.7783
	27.2	98.9166	99.7369	99.6581
	28.8	98.8199	99.4913	99.3696
	30.4	98.8199	99.4243	99.033
	32	99.1488	99.4913	99.033
	33.6	99.1488	99.3796	98.8887
	35.2	99.1488	99.3573	99.1051
	36.8	99.052	99.4019	99.4658
	38.4	98.9747	99.3349	99.5139
	40	99.0327	99.3349	99.4658
	41.6	98.8005	99.2009	99.3215
	43.2	98.7425	99.067	99.0811
	44.8	98.7618	98.9776	99.057
	46.4	98.6845	98.9776	99.2013
	48	98.6845	99.2009	99.2734
	49.6	98.5684	99.2009	99.3215
	51.2	98.2202	99.5136	99.4658
	52.8	98.2588	99.6253	99.4417
	54.4	98.2202	99.2903	99.2734
	56	98.1041	99.0893	99.2494
	57.6	98.0847	98.6203	99.4898
	59.2	98.0267	98.5086	99.4898
	60.8	98.1041	98.6873	99.4658
	62.4	98.2202	98.933	99.0811
	64	98.0654	98.7766	99.033
	65.6	97.8913	98.8883	99.0811
	67.2	97.6591	98.8436	99.3936
	68.8	97.4657	98.866	99.7062
	70.4	97.5624	99.0223	99.6341
	72	97.6204	99.0893	99.4177
	73.6	97.6011	98.8883	99.057
	75.2	97.8139	98.665	99.1051
	76.8	97.8719	98.6426	99.2734
	78.4	97.7558	98.4863	99.7062
	80	97.7752	98.665	99.9947
	81.6	97.5044	98.7766	99.7543
	83.2	97.3109	98.732	99.1532
	84.8	97.1755	98.5086	98.7445
	86.4	97.1368	98.531	98.5281
	88	97.0981	98.263	98.5521
	89.6	97.3109	97.995	98.7685
	91.2	97.2528	98.3076	98.9609
	92.8	97.1174	98.4416	99.0089
	94.4	96.924	98.5086	99.2734
	96	96.6531	98.7543	99.3215
	97.6	96.4984	98.4416	99.3936
	99.2	97.2916	98.397	99.2494
	100.8	97.9125	98.9032	99.2253
	102.4	100.126	100.064	98.7926
	104	102.741	101.342	99.033
	105.6	104.904	102.329	98.9368
	107.2	106.438	102.532	99.2013
	108.8	108.023	102.416	99.2975
	110.4	109.381	102.648	99.3215
	112	110.638	102.706	99.1532
	113.6	111.795	103.287	99.2253
	115.2	112.55	103.81	99.4177
	116.8	113.103	104.071	99.586
	118.4	113.958	103.693	99.61
	120	114.914	103.723	99.4898
	121.6	115.668	103.81	99.8264
	123.2	116.725	104.129	99.9226
	124.8	117.429	104.651	100.019
	126.4	118.083	104.942	99.8745
	128	118.762	105.145	99.5139
	129.6	119.34	105.087	99.4658
	131.2	120.019	105.29	99.8745
	132.8	120.547	105.697	100.115
	134.4	121.327	105.958	100.283
	136	121.805	106.364	100.524
	137.6	122.258	107.177	100.427
	139.2	122.987	107.119	100.211
	140.8	123.465	107.206	100.019
	142.4	123.666	107.7	100.067
	144	124.245	107.758	99.8264
	145.6	124.219	108.106	99.9707
	147.2	124.672	108.484	99.9466
	148.8	125.1	108.542	99.8745
	150.4	125.301	108.745	100.043
	152	125.427	109.297	100.379
	153.6	125.678	109.384	100.331
	155.2	125.854	109.616	100.235
	156.8	126.382	109.732	100.283
	158.4	126.659	109.674	100.403
	160	126.986	110.081	100.355
	161.6	127.237	110.69	100.836
	163.2	127.615	110.806	100.812
	164.8	127.916	111.242	101.004
	166.4	128.168	111.213	101.053
	168	128.445	111.271	100.981
	169.6	128.621	111.619	100.62
	171.2	128.872	111.881	100.764
	172.8	129.073	111.939	100.668
	174.4	129.073	112.2	100.86
	176	129.275	112.577	100.524
	177.6	129.601	113.245	100.403
	179.2	129.954	113.042	100.307
	180.8	130.431	113.274	100.403
	182.4	130.582	113.245	100.692
	184	130.708	113.332	100.836
	185.6	130.758	113.855	100.668
	187.2	130.758	113.942	100.716
	188.8	130.859	113.448	100.572
	190.4	131.085	113.535	100.259
	192	131.136	113.361	100.307
	193.6	131.261	113.158	100.524
	195.2	131.337	113.303	100.692
	196.8	131.538	113.71	101.004
	198.4	131.865	114.029	100.908
	200	131.991	114.639	100.764
	201.6	132.016	114.639	100.764
	203.2	131.94	114.436	100.596
	204.8	131.89	114.552	100.692
	206.4	131.739	114.958	100.884
	208	132.041	115.393	100.981
	209.6	131.966	115.713	101.053
	211.2	132.066	115.568	101.365
	212.8	132.444	115.423	101.101
	214.4	132.745	115.161	101.149
	216	132.796	115.132	101.269
	217.6	132.997	115.626	101.221
	219.2	132.921	115.684	100.812
	220.8	133.072	115.684	100.788
	222.4	133.072	115.742	100.764
	224	133.122	115.539	100.692
	225.6	133.198	115.568	101.077
	227.2	133.122	115.771	101.317
	228.8	133.374	115.771	101.125
	230.4	133.55	115.539	101.125
	232	133.248	115.858	101.101
	233.6	133.097	115.945	100.981
	235.2	133.097	115.916	100.908
	236.8	132.745	115.858	100.716
	238.4	132.745	115.887	100.981
	240	132.77	115.597	101.173
	241.6	133.022	115.858	100.981
	243.2	133.248	115.597	101.101
	244.8	133.6	115.684	100.908
	246.4	133.676	116.061	100.596
	248	133.525	116.323	101.149
	249.6	133.399	116.7	101.125
	251.2	133.651	116.816	101.004
	252.8	133.751	116.845	100.932
	254.4	133.978	116.613	100.836
	256	134.103	116.148	100.692
	257.6	134.053	115.8	100.86
	259.2	133.952	115.742	100.932
	260.8	133.927	115.8	100.716
	262.4	133.776	116.235	100.476
	264	133.424	116.323	100.283
	265.6	133.223	116.352	100.548
	267.2	133.475	116.555	100.74
	268.8	133.449	116.642	101.389
	270.4	133.6	116.932	101.461
	272	133.625	116.758	101.293
	273.6	133.399	116.41	101.101
	275.2	133.475	116.352	100.956
	276.8	133.902	116.323	100.836
	278.4	133.978	116.526	100.74
	280	133.802	116.758	100.692
	281.6	133.751	116.758	100.764
	283.2	133.701	116.642	101.004
	284.8	133.852	116.932	101.221
	286.4	134.053	116.961	101.341
	288	134.254	116.874	101.101
	289.6	134.154	116.671	100.981
	291.2	134.053	116.671	100.812
	292.8	134.003	116.497	100.788
	294.4	133.902	116.293	101.173
	296	133.726	116.032	101.197
	297.6	133.701	115.916	101.149
	299.2	131.8146*	116.003	101.101
	300.8	136.316	116.177	102.111
	302.4	138.592	118.779	101.87
	304	136.436	121.856	101.63
	305.6	135.771	118.71	101.269
	307.2	135.016	117.871	101.173
	308.8	133.244	117.983	101.125
	310.4	131.418	116.978	101.269
	312	130.625	116.308	101.437
	313.6	130.044	116.062	101.582
	315.2	129.812	115.794	101.582
	316.8	129.677	115.481	101.389
	318.4	129.077	115.414	101.101
	320	128.516	115.079	101.173
	321.6	127.781	114.499	101.269
	323.2	127.143	113.851	101.509
	324.8	126.756	113.427	101.654
	326.4	126.33	113.025	101.485
	328	125.75	112.868	101.269
	329.6	125.247	112.489	101.029
	331.2	124.666	112.042	101.101
	332.8	124.473	111.618	101.125
	334.4	124.067	111.35	101.293
	336	123.505	111.082	101.341
	337.6	122.654	110.814	101.125
	339.2	122.016	110.568	100.956
	340.8	121.165	110.479	101.197
	342.4	120.623	110.166	101.125
	344	119.578	109.831	101.389
	345.6	118.301	109.429	101.365
	347.2	116.792	109.184	101.053
	348.8	115.69	108.96	100.5
	350.4	114.219	108.782	100.331
	352	113.175	108.625	100.572
	353.6	112.111	108.469	100.908
	355.2	111.163	108.29	101.197
	356.8	110.176	107.978	101.413
	358.4	109.247	107.732	101.004
	360	108.145	107.397	100.908
	361.6	107.506	107.174	101.173
	363.2	106.926	106.928	101.053
	364.8	106.423	106.705	100.884
	366.4	105.881	106.191	100.692
	368	105.049	105.856	100.403
	369.6	104.643	105.789	100.355
	371.2	104.237	105.61	100.403
	372.8	103.811	105.744	100.451
	374.4	103.579	105.677	100.716
	376	103.366	105.32	100.981
	377.6	102.96	105.097	100.812
	379.2	102.96	104.896	100.692
	380.8	102.999	104.427	100.403
	382.4	102.67	104.337	100.187
	384	102.554	103.891	100.331
	385.6	102.225	103.511	100.403
	387.2	101.993	103.422	100.379
	388.8	101.78	103.31	100.403
	390.4	101.78	103.132	100.403
	392	101.451	103.288	100.427
	393.6	101.393	103.332	100.115
	395.2	101.47	103.243	99.6581
	396.8	101.509	102.998	99.4417
	398.4	101.548	102.64	99.2734
	400	101.49	102.35	99.6341
	401.6	101.025	102.216	99.9947
	403.2	100.793	102.328	100.211
	404.8	100.793	102.194	100.235
	406.4	100.58	102.283	100.355
	408	100.658	102.394	100.427
	409.6	100.522	102.283	100.62
	411.2	100.232	101.948	100.572
	412.8	100.116	101.68	100.403
	414.4	99.8259	101.166	100.476
	416	99.6711	101.099	100.355
	417.6	99.8065	101.166	100.307
	419.2	99.7292	101.278	100.524
	420.8	99.9613	101.323	100.5
	422.4	99.8839	101.099	100.307
	424	99.6711	100.876	100.644
	425.6	99.5744	100.853	100.62
	427.2	99.555	100.787	100.836
	428.8	99.4777	100.876	100.908
	430.4	99.4196	100.943	100.764
	432	99.2068	100.675	100.187
	433.6	99.0134	100.541	99.8264
	435.2	98.994	100.474	99.4658
	436.8	98.9553	100.385	99.61
	438.4	99.1294	100.318	99.5619
	440	98.936	100.407	99.9226
	441.6	98.6845	100.184	100.115
	443.2	98.6458	100.027	100.139
	444.8	98.6458	100.184	100.307
	446.4	98.6458	100.251	100.524
	448	98.7038	100.429	100.355
	449.6	98.5684	100.474	100.283
	451.2	98.3362	100.184	100.259
	452.8	98.2782	99.8486	100.163
	454.4	98.3749	99.9156	100.115
	456	98.3943	99.8263	100.235
	457.6	98.3169	99.8486	100.307
	459.2	98.1815	99.6476	100.259
	460.8	98.0267	99.7593	100.307
	462.4	97.6398	99.6029	100.379
	464	97.6398	99.6476	100.307
	465.6	97.7365	99.6029	100.283
	467.2	97.7365	99.6029	100.235
	468.8	97.6978	99.2456	99.9466
	470.4	97.7945	99.3349	99.9707
	472	97.543	99.2903	100.043
	473.6	97.7945	99.5136	99.9707
	475.2	98.0654	99.6253	99.7783
	476.8	97.8139	99.5583	99.7783
	478.4	97.543	99.2009	99.6821
	480	97.4463	99.067	99.8264
	481.6	97.2335	99.0223	100.764
	483.2	97.3883	99.1786	99.6341
	484.8	97.427	99.0446	96.3642
	486.4	97.2916	99.0446	91.6999
	488	96.924	98.9106	86.6989
	489.6	96.7305	98.9776	82.4193
	491.2	96.6531	98.933	80.7363
	492.8	96.537	98.9106	79.4139
	494.4	96.5564	98.732	78.5243
	496	96.8659	98.9106	78.332
	497.6	98.3943	99.1563	78.1877
	499.2	98.433	99.2009	77.8992
	500.8	91.1782	99.1563	78.0435
	502.4	78.1002	98.933	77.8271
	504	63.3198	98.5756	77.6828
	505.6	51.4606	98.2853	77.9473
	507.2	46.8369	98.1736	77.803
	508.8	47.4753	97.8833	77.6107
	510.4	47.8623	98.0843	77.779
	512	48.2298	98.129	77.5386
	513.6	48.7522	98.2407	77.5145
	515.2	49.3713	98.4193	77.5626
	516.8	49.7969	98.4416	77.5145
	518.4	49.9129	98.4416	77.5145
	520	49.8549	98.4863	77.779
	521.6	49.7775	98.4863	78.0194
	523.2	49.7001	98.464	78.0916
	524.8	49.7001	98.3076	78.1637
	526.4	49.8162	98.2183	78.2839
	528	49.7969	98.196	78.4762
	529.6	49.8356	98.3523	78.6686
	531.2	49.8162	98.3523	78.7648
	532.8	49.6228	98.1067	78.6926
	534.4	49.3906	97.9057	78.7648
	536	49.4099	97.928	78.7888
	537.6	49.4873	97.794	78.8609
	539.2	49.4293	97.928	78.885
	540.8	49.4099	97.9057	78.8609
	542.4	49.4099	97.66	78.9571
	544	49.2939	97.7493	79.3178
	545.6	49.4486	97.928	79.3899
	547.2	49.526	97.9503	79.4139
	548.8	49.3713	97.794	79.5101
	550.4	49.2552	97.7717	79.3418
	552	49.1778	97.4813	79.2697
	553.6	49.1584	97.5483	79.3178
	555.2	49.2939	97.5037	79.2697
	556.8	49.3713	97.66	79.3178
	558.4	49.3519	97.6823	79.5582
	560	49.3519	97.593	79.6784
	561.6	49.2165	97.8163	79.8467
	563.2	49.1971	97.928	80.0391
	564.8	49.2165	97.727	80.0631
	566.4	49.1778	97.727	80.015
	568	49.1778	97.8163	80.1112
	569.6	49.2552	97.6823	80.1112
	571.2	49.1971	97.995	80.1112
	572.8	49.1391	98.0843	80.2314
	574.4	49.1778	97.8387	80.1593
	576	35.2486	97.5483	80.2554
	577.6	32.811	97.325	80.3035
	579.2	108.919	97.0124	80.3997
	580.8	227.897	96.8114	80.4959
	582.4	351.906	96.923	80.6401
	584	443.993	96.8784	80.6161
	585.6	466.241	96.789	80.6401
	587.2	443.8	96.8784	80.2554
	588.8	443.606	97.0124	76.0479
	590.4	443.413	96.923	62.5838
	592	442.832	97.124	107.592
	593.6	442.445	97.1463	186.621
	595.2	442.058	96.9677	273.849
	596.8	441.865	96.8114	358.481
	598.4	442.058	96.7667	389.977
	600	442.058	96.6104	332.274
	601.6	442.445	97.0347	351.508
	603.2	442.058	97.0794	350.787
	604.8	441.671	97.0794	350.546
	606.4	441.478	96.99	350.546
	608	441.285	97.057	350.787
	609.6	441.285	96.9677	350.546
	611.2	441.285	97.191	350.787
	612.8	440.898	97.325	350.787
	614.4	440.704	97.258	350.787
	616	440.898	97.392	351.027
	617.6	440.898	97.3474	351.027
	619.2	440.898	97.0794	350.787
	620.8	441.091	96.9007	350.066
	622.4	441.285	96.99	349.825
	624	441.285	96.8114	349.344
	625.6	441.671	97.0794	349.585
	627.2	441.478	97.0124	350.066
	628.8	441.285	96.9677	350.787
	630.4	441.285	96.722	350.306
	632	441.091	96.4987	350.546
	633.6	440.704	96.5657	350.066
	635.2	440.511	97.124	350.066
	636.8	440.317	0	349.825
	638.4	440.511	0	350.066
	640	440.704	0	349.585
	641.6	440.898	0	349.585
	643.2	440.898	0	349.825
	644.8	440.704	0	350.066
	646.4	440.511	0	350.066
	648	440.124	0	350.546
	649.6	439.737	0	350.306
	651.2	439.93	0	350.306
	652.8	439.93	0	350.546
	654.4	439.737	0	350.546
	656	439.93	0	350.066
	657.6	439.737	0	350.306
	659.2	439.737	0	350.066
	660.8	440.124	0	350.306
	662.4	439.737	0	350.306
	664	439.543	0	349.585
	665.6	439.737	0	349.104
	667.2	439.93	0	348.623
	668.8	440.317	0	348.863
	670.4	440.124	0	349.104
	672	439.543	0	349.104
	673.6	439.156	0	349.344
	675.2	439.35	0	349.825
	676.8	439.35	0	349.825
	678.4	439.543	0	349.585
	680	438.963	0	349.825
	681.6	438.963	0	349.104
	683.2	438.576	0	348.863
	684.8	438.77	0	348.623
	686.4	439.156	0	348.863
	688	439.156		348.623
	689.6	438.77		349.344
	691.2	438.77		349.585
	692.8	438.383		349.585
	694.4	437.996		349.585
	696	437.996		349.104
	697.6	437.996		348.863
	699.2	438.189		348.623
	700.8			348.623
	702.4			349.104
	704			349.104
	705.6			349.344
	707.2			349.344
	708.8			349.104
	710.4			348.623
	712			348.623
	713.6			348.863
	715.2			349.104
	716.8			349.344
	718.4			349.104
	720			348.863
	721.6			348.863
	723.2			348.863
	724.8			348.623
	726.4			348.383
	728			348.383
	729.6			348.142
	731.2			348.383
	732.8			348.623
	734.4			348.623
	736			348.623
	737.6			348.863
	739.2			348.863
	740.8			348.863
	742.4
	744
	745.6
	747.2
	748.8
	750.4
	752
	753.6
	755.2
	756.8
	758.4
	760
	761.6
	763.2
	764.8
	766.4
	768
	769.6
	771.2
	772.8
	774.4
	776
	777.6
	779.2
	780.8
	782.4
	784
	785.6
	787.2
	788.8
	790.4
	792
	793.6
	795.2
	796.8
	798.4
	800

## Sheet: Figure 4D
	Time(s)	With ATc		No ATc
	0	90.224		83.928
	1.6	86.612		83.397					With ATc						No ATc
	3.2	87.119		83.465					51.0818	46.4892	69.7508	52.8443	97.3103		31.796	43.6222	53.8392	69.5405	34.7158	30.768
	4.8	90.169		83.402
	6.4	94.124		83.771
	8	95.596		84.701
	9.6	95.962		85.844
	11.2	93.26		86.521
	12.8	91.413		86.964
	14.4	91.391		85.672
	16	91.946		85.461
	17.6	92.438		85.419
	19.2	93.728		86.051
	20.8	94.7		85.844
	22.4	94.827		86.007
	24	95.553		86.575
	25.6	97.41		87.26
	27.2	96.886		86.852
	28.8	96.43		87.024
	30.4	96.671		87.619
	32	97.165		88.177
	33.6	95.832		89.105
	35.2	94.586		88.97
	36.8	93.778		89.217
	38.4	95.621		89.682
	40	95.829		90.237
	41.6	96.93		90.248
	43.2	96.596		89.834
	44.8	96.615		89.446
	46.4	96.877		90.656
	48	96.439		91.335
	49.6	92.602		92.221
	51.2	91.101		93.388
	52.8	92.447		94.203
	54.4	96.369		93.863
	56	100.413		94.869
	57.6	100.866		94.493
	59.2	98.577		94.328
	60.8	97.716		94.472
	62.4	96.377		94.331
	64	96.175		94.128
	65.6	97.248		95.052
	67.2	97.392		95.245
	68.8	99.405		95.821
	70.4	102.229		95.449
	72	99.706		94.952
	73.6	96.257		94.203
	75.2	91.881		93.076
	76.8	90.09		93.541
	78.4	92.103		95.113
	80	94.904		96.107
	81.6	96.014		97.937
	83.2	99.119		98.196
	84.8	100.984		98.699
	86.4	101.745		99.298
	88	101.829		99.112
	89.6	101.409		98.984
	91.2	99.841		98.688
	92.8	102.089		98.289
	94.4	102.05		98.155
	96	101.589		97.552
	97.6	100.963		98.042
	99.2	99.067		100.026
	100.8	97.558		100.68
	102.4	99.832		102.455
	104	98.661		102.896
	105.6	102.07		102.005
	107.2	104.6		102.191
	108.8	103.33		102.21
	110.4	101.081		100.74
	112	100.634		100.599
	113.6	97.543		100.423
	115.2	96.121		99.986
	116.8	96.55		100.526
	118.4	97.168		101.151
	120	99.073		100.851
	121.6	101.296		100.815
	123.2	101.005		100.521
	124.8	98.966		101.091
	126.4	99.418		101.872
	128	98.997		104.166
	129.6	98.127		105.468
	131.2	100.44		105.756
	132.8	100.943		104.744
	134.4	99.875		104.517
	136	102.444		104.475
	137.6	104.551		105.575
	139.2	104.082		106.716
	140.8	106.205		105.918
	142.4	102.574		105.482
	144	98.746		105.604
	145.6	99.316		106.596
	147.2	100.962		106.438
	148.8	102.301		107.371
	150.4	101.989		107.849
	152	100.752		108.515
	153.6	100.446		107.966
	155.2	102.027		108.711
	156.8	101.736		109.442
	158.4	105.065		111.382
	160	104.531		114.434
	161.6	104.942		114.752
	163.2	103.401		112.934
	164.8	101.689		111.802
	166.4	100.528		110.209
	168	102.764		110.545
	169.6	102.182		112.079
	171.2	102.41		113.709
	172.8	100.834		114.717
	174.4	98.364		113.768
	176	99.763		112.956
	177.6	101.423		114.073
	179.2	104.697		116.216
	180.8	107.088		117.505
	182.4	105.447		117.987
	184	101.328		116.263
	185.6	99.674		115.842
	187.2	101.471		115.469
	188.8	103.429		116.786
	190.4	104.93		117.978
	192	103.91		120.725
	193.6	103.322		122.177
	195.2	102.528		121.902
	196.8	104.71		120.362
	198.4	105.948		118.83
	200	106.955		120.58
	201.6	104.58		123.172
	203.2	105.661		125.099
	204.8	113.047		122.445
	206.4	127.544		121.123
	208	146.47		129.473
	209.6	166.393		144.808
	211.2	174.313		162.091
	212.8	172.081		176.654
	214.4	171.952		176.349
	216	173.933		169.893
	217.6	169.257		170.93
	219.2	170.136		170.412
	220.8	169.024		169.419
	222.4	167.086		169.783
	224	163.763		170.096
	225.6	162.323		169.155
	227.2	158.197		170.255
	228.8	157.269		172.038
	230.4	155.703		174.091
	232	159.232		175.472
	233.6	161.05		175.592
	235.2	161.16		172.098
	236.8	160.729		170.435
	238.4	160.112		171.617
	240	158.178		173.618
	241.6	156.945		174.267
	243.2	155.178		174.018
	244.8	155.006		171.528
	246.4	156.629		170.817
	248	163.337		172.067
	249.6	164.666		174.326
	251.2	162.828		176.066
	252.8	160.551		177.225
	254.4	160.611		176.923
	256	160.206		175.345
	257.6	159.049		174.772
	259.2	156.16		174.428
	260.8	156.877		172.382
	262.4	160.198		173.817
	264	165.008		176.222
	265.6	167.218		179.021
	267.2	169.939		179.493
	268.8	171.912		179.067
	270.4	173.23		177.478
	272	170.724		178.687
	273.6	166.69		181.091
	275.2	166.572		185.014
	276.8	173.895		186.609
	278.4	177.289		185.992
	280	177.707		183.72
	281.6	176.965		181.987
	283.2	174.102		181.31
	284.8	176.578		181.449
	286.4	181.872		183.091
	288	181.824		184.371
	289.6	179.413		185.065
	291.2	175.85		185.046
	292.8	172.428		183.491
	294.4	172.245		182.264
	296	171.611		183.533
	297.6	172.468		188.256
	299.2	175.009		191.397
	300.8	176.289		194.716
	302.4	183.323		195.854
	304	187.055		193.408
	305.6	185.997		187.346
	307.2	183.588		186.602
	308.8	181.976		186.9
	310.4	179.289		192.215
	312	179.095		197.82
	313.6	177.778		200.324
	315.2	175.488		198.841
	316.8	172.642		202.481
	318.4	173.104		204.268
	320	172.312		204.601
	321.6	176.837		202.502
	323.2	181.401		200.999
	324.8	184.603		200.821
	326.4	187.604		203.692
	328	188.657		206.665
	329.6	187.334		207.855
	331.2	187.992		206.808
	332.8	183.014		207.134
	334.4	182.668		208.772
	336	181.834		211.366
	337.6	177.943		211.276
	339.2	178.971		207.419
	340.8	180.244		204.839
	342.4	179.774		202.584
	344	185.375		202.941
	345.6	185.331		205.483
	347.2	181.39		207.345
	348.8	181.486		207.062
	350.4	183.042		208.307
	352	182.05		207.681
	353.6	182.626		206.338
	355.2	184.675		206.61
	356.8	185.712		207.61
	358.4	190.469		209.919
	360	193.019		214.903
	361.6	192.299		219.696
	363.2	188.055		223.012
	364.8	187.593		224.376
	366.4	188.259		219.003
	368	193.8		215.056
	369.6	193.48		214.481
	371.2	193.24		215.297
	372.8	194.699		219.635
	374.4	194.589		224.047
	376	195.714		224.592
	377.6	191.543		224.373
	379.2	186.866		223.701
	380.8	183.098		221.176
	382.4	185.591		222.222
	384	189.001		225.037
	385.6	194.798		224.014
	387.2	192.155		222.92
	388.8	186.955		224.37
	390.4	180.751		226.206
	392	179.911		230.333
	393.6	183.862		232.289
	395.2	193.499		232.07
	396.8	197.962		231.14
	398.4	196.547		231.808
	400	196.818		232.097
	401.6	197.569		231.403
	403.2	197.559		230.587
	404.8	199.767		233.178
	406.4	195.955		234.155
	408	195.221		226.098
	409.6	194.789		215.686
	411.2	190.559		209.331
	412.8	187.327		212.137
	414.4	191.293
	416	193.494
	417.6	195.263
	419.2	199.047
	420.8	199.649
	422.4	197.415
	424	196.681
	425.6	193.464
	427.2	188.572
	428.8	192.135
	430.4	200.173
	432	207.209
	433.6	206.639
	435.2	203.059
	436.8	199.11
	438.4	194.364
	440	199.253
	441.6	200.051
	443.2	195.692
	444.8	196.485
	446.4	199.646
	448	200.825
	449.6	208.67
	451.2	209.046
	452.8	206.454
	454.4	205.115
	456	203.396
	457.6	201.229
	459.2	206.561
	460.8	216.162
	462.4	221.94
	464	224.332
	465.6	221.124
	467.2	217.961
	468.8	219.422
	470.4	223.266
	472	227.332
	473.6	232.573
	475.2	230.204
	476.8	227.796
	478.4	223.441
	480	220.812
	481.6	225.319
	483.2	230.421
	484.8	235.441
	486.4	239.888
	488	236.985
	489.6	235.856
	491.2	238.991
	492.8	238.96
	494.4	238.304
	496	232.272
	497.6	224.629
	499.2	223.17
	500.8	226.526
	502.4	232.348
	504	236.465
	505.6	230.929
	507.2	227.99
	508.8	227.555
	510.4	233.158
	512	240.229
	513.6	248.235
	515.2	248.112
	516.8	252.65
	518.4	256.964
	520	259.917
	521.6	256.164
	523.2	252.525
	524.8	249.601
	526.4	254.368
	528	258.704
	529.6	257.795
	531.2	252.26
	532.8	249.511
	534.4	244.453
	536	241.421
	537.6	239.184
	539.2	243.066
	540.8	248.883
	542.4	262.061
	544	266.677
	545.6	266.606
	547.2	256.958
	548.8	254.902
	550.4	253.941
	552	261.113
	553.6	265.188
	555.2	273.433
	556.8	270.042
	558.4	269.769
	560	266.726
	561.6	260.279
	563.2	249.919
	564.8	251.932
	566.4	253.486
	568	263.966
	569.6	269.35
	571.2	268.978
	572.8	269.74
	574.4	271.545
	576	277.684
	577.6	289.07
	579.2	287.419
	580.8	285.783
	582.4	282.264
	584	271.164
	585.6	266.171
	587.2	267.197
	588.8	275.273
	590.4	288.232
	592	294.694
	593.6	293.292
	595.2	288.484
	596.8	287.265
	598.4	285.085
	600	287.372
	601.6	283.623
	603.2	275.802
	604.8	276.965
	606.4	277.755
	608	274.894
	609.6	278.08
	611.2	282.559
	612.8	283.621
	614.4	285.826
	616	283.87
	617.6	280.088
	619.2	276.117
	620.8	277.528
	622.4	284.415
	624	284.74
	625.6	287.371
	627.2	287.04
	628.8	286.988
	630.4	285.262
	632	284.627
	633.6	284.075
	635.2	286.622
	636.8	291.424
	638.4	286.161
	640	281.79
	641.6	274.464
	643.2	279.558
	644.8	290.41
	646.4	305.167
	648	304.593
	649.6	299.004
	651.2	294.837
	652.8	292.751
	654.4	295.435
	656	298.48
	657.6	295.516
	659.2	289.784
	660.8	286.439
	662.4
	664
	665.6
	667.2
	668.8
	670.4
	672
	673.6
	675.2
	676.8
	678.4
	680
	681.6
	683.2
	684.8
	686.4
	688
	689.6
	691.2
	692.8
	694.4
	696
	697.6
	699.2
	700.8
	702.4
	704
	705.6
	707.2
	708.8

## Sheet: Figure 4E
	Time(s)	With ATc		No ATc
	0	101.228		119.43			With ATc						No ATC
	1.6	103.317		114.969				189.148	203.899	143.463			267.792	274.484	243.617
	3.2	103.293		113.776
	4.8	102.34		116.119
	6.4	104.267		117.666
	8	103.508		123.72
	9.6	102.787		127.321
	11.2	104.976		123.413
	12.8	105.305		120.853
	14.4	104.906		119.365
	16	106.102		119.009
	17.6	104.317		122.413
	19.2	103.483		126.157
	20.8	105.564		124.908
	22.4	108.682		125.798
	24	112.959		124.511
	25.6	115.183		124.929
	27.2	114.332		125.474
	28.8	114.364		125.476
	30.4	113.464		123.496
	32	112.933		124.893
	33.6	112.466		127.361
	35.2	112.445		128.52
	36.8	114.978		128.456
	38.4	114.274		126.881
	40	112.48		125.492
	41.6	112.825		128.108
	43.2	112.192		132.298
	44.8	112.24		132.954
	46.4	115.949		132.665
	48	116.353		130.824
	49.6	117.668		129.583
	51.2	118.719		133.523
	52.8	115.871		133.551
	54.4	113.734		135.078
	56	114.454		135.665
	57.6	116.466		136.909
	59.2	118.527		137.026
	60.8	116.769		138.853
	62.4	118.962		136.45
	64	119.599		135.549
	65.6	122.526		134.533
	67.2	126.488		136.866
	68.8	124.781		137.263
	70.4	123.811		135.216
	72	123.926		134.563
	73.6	120.209		134.275
	75.2	121.621		134.813
	76.8	123.303		136.735
	78.4	120.313		139.317
	80	120.79		137.702
	81.6	119.538		138.558
	83.2	118.138		140.6
	84.8	121.129		140.55
	86.4	122.721		139.451
	88	125.796		141.476
	89.6	124.354		140.281
	91.2	121.502		141.232
	92.8	120.618		142
	94.4	124.31		143.86
	96	126.427		145.071
	97.6	130.782		145.734
	99.2	128.324		145.551
	100.8	123.729		143.008
	102.4	121.468		138.467
	104	122.968		139.96
	105.6	122.845		141.524
	107.2	125.95		141.866
	108.8	126.971		142.355
	110.4	128.271		140.952
	112	127.903		141.023
	113.6	128.972		145.301
	115.2	129.531		146.997
	116.8	130.738		146.062
	118.4	128.989		146.431
	120	131.052		144.542
	121.6	133.844		144.694
	123.2	134.376		145.312
	124.8	136.273		145.549
	126.4	132.749		143.497
	128	128.578		145.146
	129.6	128.548		145.193
	131.2	128.969		146.726
	132.8	125.731		147.299
	134.4	130.153		147.889
	136	129.894		145.984
	137.6	129.231		146.774
	139.2	129.44		150.094
	140.8	127.623		153.782
	142.4	124.557		154.292
	144	125.668		150.046
	145.6	127.82		144.703
	147.2	129.781		141.583
	148.8	134.165		142.159
	150.4	135.993		147.247
	152	135.696		150.985
	153.6	135.136		151.515
	155.2	139.571		153.102
	156.8	142.541		153.895
	158.4	143.966		154.872
	160	140.499		159.871
	161.6	134.517		159.209
	163.2	129.711		157.717
	164.8	130.099		156.608
	166.4	131.439		156.608
	168	134.477		157.484
	169.6	135.826		157.876
	171.2	135.873		157.179
	172.8	133.878		155.371
	174.4	134.369		154.315
	176	135.915		153.284
	177.6	137.066		153.257
	179.2	136.343		154.173
	180.8	134.707		156.798
	182.4	133.552		154.568
	184	134.181		153.122
	185.6	137.229		152.346
	187.2	136.333		153.069
	188.8	135.181		155.485
	190.4	133.462		157.942
	192	135.797		157.55
	193.6	138.497		156.21
	195.2	141.506		158.51
	196.8	140.416		158.537
	198.4	139.894		156.377
	200	140.942		157.235
	201.6	141.114		156.493
	203.2	139.927		155.248
	204.8	137.04		157.061
	206.4	133.439		158.112
	208	129.614		157.194
	209.6	128.236		159.148
	211.2	133.677		160.377
	212.8	150.685		159.124
	214.4	182.727		157.513
	216	230.021		156.556
	217.6	270.143		150.898
	219.2	297.841		144.377
	220.8	318.571		149.337
	222.4	329.037		170.559
	224	328.97		217.757
	225.6	327.627		295.65
	227.2	312.003		371.589
	228.8	302.168		408.575
	230.4	299.607		419.598
	232	309.926		422.65
	233.6	319.411		426.111
	235.2	331.222		424.731
	236.8	336.09		408.781
	238.4	335.582		393.001
	240	327.409		385.404
	241.6	318.294		380.811
	243.2	310.382		371.467
	244.8	298.189		371.725
	246.4	295.32		371.727
	248	307.649		380.034
	249.6	317.494		394.179
	251.2	319.925		411.225
	252.8	316.2		409.569
	254.4	303.545		400.69
	256	292.395		379.096
	257.6	302.156		360.207
	259.2	304.855		351.818
	260.8	308.982		360.556
	262.4	308.193		371.35
	264	310.093		374.402
	265.6	305.551		372.223
	267.2	311.168		362.572
	268.8	310.366		356.525
	270.4	313.098		357.69
	272	315.987		354.033
	273.6	323.525		357.988
	275.2	316.788		366.708
	276.8	309.939		364.594
	278.4	303.403		362.948
	280	300.004		357.839
	281.6	302.297		345.671
	283.2	306.343		348.514
	284.8	300.756		353.781
	286.4	296.588		358.076
	288	295.858		362.839
	289.6	301.442		364.754
	291.2	303.519		363.574
	292.8	301.232		359.159
	294.4	293.354		353.785
	296	288.235		353.848
	297.6	295.122		359.155
	299.2	305.595		369.08
	300.8	303.243		377.249
	302.4	305.918		375.511
	304	304.608		373.284
	305.6	299.305		361.707
	307.2	301.882		350.916
	308.8	308.315		340.796
	310.4	307.055		339.036
	312	304.005		342.291
	313.6	297.638		355.038
	315.2	285.305		363.532
	316.8	282.857		370.702
	318.4	296.846		361.158
	320	312.104		358.944
	321.6	321.563		355.375
	323.2	321		356.726
	324.8	304.684		366.411
	326.4	292.566		383.667
	328	293.36		378.734
	329.6	301.524		380.056
	331.2	309.505		370.119
	332.8	311.596		368.745
	334.4	303.584		368.23
	336	302.273		367.108
	337.6	302.594		357.737
	339.2	302.991		354.648
	340.8	298.55		353.035
	342.4	292.285		360.711
	344	287.908		370.345
	345.6	290.48		366.227
	347.2	294.253		352.562
	348.8	292.87		344.817
	350.4	295.489		343.273
	352	293.472		350.475
	353.6	293.166		363.706
	355.2	295.916		362.125
	356.8	295.117		361.46
	358.4	286.232		367.663
	360	281.555		368.278
	361.6	275.877		371.658
	363.2	281.859		374.311
	364.8	295.258		366.692
	366.4	310.001		375.586
	368	316.761		378.176
	369.6	312.361		369.213
	371.2	305.469		360.063
	372.8	291.867		355.228
	374.4	297.982		349.537
	376	303.951		356.217
	377.6	311.577		364.004
	379.2	306.909		365.565
	380.8	304.537		365.415
	382.4	292.639		355.105
	384	297.835		350.317
	385.6	304.241		364.097
	387.2	314.622		380.935
	388.8	309.198		389.351
	390.4	313.339		384.445
	392	315.338		373.955
	393.6	310.315		367.503
	395.2	318.733		371.934
	396.8	320.063		371.692
	398.4	315.225		370.603
	400	313.981		368.714
	401.6	313.194		376.744
	403.2	305.655		379.189
	404.8	301.565		372.12
	406.4	293.773		364.752
	408	301		364.635
	409.6	304.734		379.944
	411.2	312.203		389.15
	412.8	315.095		388.035
	414.4	307.598		382.598
	416	295.488		376.217
	417.6	292.074		376.33
	419.2	284.186		380.881
	420.8	280.868		376.94
	422.4	289.109		369.061
	424	295.659		364.955
	425.6	304.528		366.89
	427.2	318.977		377.05
	428.8	325.773		378.363
	430.4	330.949		381.005
	432	346.501		385.12
	433.6	354.679		379.743
	435.2	363.067		382.05
	436.8	365.226		384.767
	438.4	349.485		379.585
	440	332.698		380.637
	441.6	331.255		383.356
	443.2	333.771		380.056
	444.8	338.932		383.558
	446.4	340.231		386.457
	448	340.669		383.054
	449.6	339.712		389.252
	451.2	343.263		383.85
	452.8	346.405		381.977
	454.4	349.996		376.879
	456	357.021		376.762
	457.6	367.263		390.853
	459.2	373.726		429.7
	460.8	381.527		460.866
	462.4	388.204		489.4
	464	387.799		495.439
	465.6	382.378		470.312
	467.2	372.671		468.802
	468.8	356.342		467.93
	470.4	353.55		466.442
	472	354.901		477.649
	473.6	364.593		491.376
	475.2	373.423		488.01
	476.8	376.991		494.955
	478.4	369.903		492.875
	480	363.145		492.744
	481.6	355.796		499.591
	483.2	355.64		501.379
	484.8	342.747		490.18
	486.4	340.192		484.796
	488	345.35		494.584
	489.6	359.237		515.064
	491.2	386.31		541.776
	492.8	396.301		559.217
	494.4	397.851		549.745
	496	391.321		542.321
	497.6	371.764		530.082
	499.2	363.175		515.407
	500.8	365.847		513.831
	502.4	355.129		514.555
	504	352.518		527.453
	505.6	353.617		532.362
	507.2	346.923		518.302
	508.8	353.792		514.992
	510.4	361.247		509.794
	512	375.436		512.15
	513.6	376.842		525.427
	515.2	384.591		521.578
	516.8	371.64		504.556
	518.4	366.626		508.6
	520	351.462		506.222
	521.6	354.854		520.796
	523.2	359.426		527.042
	524.8	367.313		528.641
	526.4	366.129		516.091
	528	381.104		517.049
	529.6	375.556		520.713
	531.2	370.598		521.282
	532.8	362.656		517.849
	534.4	356.604		507.198
	536	357.58		506.613
	537.6	366.429		515.039
	539.2	367.25		509.703
	540.8	372.792		491.742
	542.4	366.003		494.614
	544	357.826		478.187
	545.6	360.008		486.393
	547.2	357.084		505.488
	548.8	357.28		513.535
	550.4	363.759		522.929
	552	356.737		530.255
	553.6	340.62		513.737
	555.2	344.564		499.861
	556.8	356.811		497.733
	558.4	364.981		504.636
	560	366.868		508.151
	561.6	352.238		505.121
	563.2	327.159		493.436
	564.8	328.963		484.046
	566.4	337.246		481.324
	568	343.352		501.159
	569.6	342.964		516.139
	571.2	335.746		521.238
	572.8	325.7		513.092
	574.4	332.236		498.073
	576	338.009		473.632
	577.6	343.312		460.944
	579.2	352.427		463.451
	580.8	359.173		465.744
	582.4	356.618		481.82
	584	351.54		491.762
	585.6	342.271		494.778
	587.2	336.925		497.353
	588.8	338.301		490.338
	590.4	343.966		475.98
	592	355.27		476.393
	593.6	363.348		469.875
	595.2	363.332		474.161
	596.8	361.825		490.413
	598.4	351.168		503.318
	600	360.51		505.855
	601.6	371.171		510.578
	603.2	373.254		511.221
	604.8	366.497		514.153
	606.4	360.208		508.614
	608	351.241		502.966
	609.6	352.543		489.516
	611.2	354.272		490.027
	612.8	359.489		499.673
	614.4	365.865		511.802
	616	367.834		505.434
	617.6	351.656		487.013
	619.2	333.474		471.567
	620.8	332.753		474.166
	622.4	340.006		483.052
	624	351.785		499.017
	625.6	359.437		506.706
	627.2	351.795		505.022
	628.8	345.751		486.998
	630.4	346.816		473.559
	632	348.333		480.115
	633.6	354.905		486.925
	635.2	356.806		491.968
	636.8	359.011		484.263
	638.4	362.057		471.621
	640	353.897		474.07
	641.6	347.913		484.608
	643.2	346.503		480.516
	644.8	341.42		495.074
	646.4	353.965		526.487
	648	365.435		598.097
	649.6	366.06		692.368
	651.2	364.977		774.784
	652.8	365.773		806.681
	654.4	360.892		832.263
	656	362.478		831.758
	657.6	373.933		796.649
	659.2	384.393		764.346
	660.8	385.017		760.452
	662.4	362.149		778.698
	664			797.465
	665.6			816.534
	667.2			846.23
	668.8			878.831
	670.4			894.003
	672			900.751
	673.6			871.178
	675.2			875.015
	676.8			901.752
	678.4			885.778
	680			864.751
	681.6			887.588
	683.2			899.283
	684.8			950.729
	686.4			993.555
	688			1000.79
	689.6			963.34
	691.2			933.795
	692.8			888.293
	694.4			844.637
	696			857.307
	697.6			894.057
	699.2			916.109
	700.8			948.283
	702.4			968.297
	704			923.043
	705.6			889.412
	707.2			872.255
	708.8			882.489

## Sheet: Figure 5F
	With ATc	No ATc
0	94.554	87.806			With ATc					No ATc
1.6	95.803	87.57			307.359	301.203	297.395			463.294	641.941	407.951
3.2	95.971	87.165
4.8	95.838	88.659
6.4	95.218	91.282
8	96.193	94.611
9.6	95.675	97.276
11.2	97.889	97.607
12.8	100.179	96.13
14.4	99.991	94.673
16	101.501	92.305
17.6	103.445	91.393
19.2	102.617	94.15
20.8	103.132	96.126
22.4	104.302	97.193
24	102.176	97.172
25.6	101.676	97.173
27.2	101.779	98.039
28.8	101.635	99.827
30.4	102.136	99.883
32	101.93	101.162
33.6	101.366	100.334
35.2	101.841	100.586
36.8	103.072	101.065
38.4	104.554	102.612
40	105.625	101.377
41.6	104.482	101.912
43.2	104.22	102.319
44.8	104.999	102.097
46.4	106.046	103.635
48	105.181	105.966
49.6	104.647	105.876
51.2	104.085	106.237
52.8	104.318	106.248
54.4	106.845	103.877
56	108.751	102.881
57.6	109.405	104.522
59.2	110.457	105.287
60.8	110.912	107.003
62.4	110.387	107.372
64	108.778	107.742
65.6	107.512	108.49
67.2	107.615	110.408
68.8	109.691	109.218
70.4	110.785	111.031
72	110.484	112.401
73.6	108.393	113.363
75.2	106.479	113.562
76.8	106.163	113.417
78.4	106.699	111.598
80	110.473	112.403
81.6	111.469	114.307
83.2	110.765	115.897
84.8	109.071	116.883
86.4	108.326	117.203
88	108.948	117.717
89.6	112.898	116.119
91.2	114.555	115.102
92.8	114.643	115.234
94.4	111.983	115.577
96	109.54	117.362
97.6	109.41	120.734
99.2	112.158	120.644
100.8	116.536	121.56
102.4	119.256	121.563
104	118.548	121.173
105.6	115.309	121.469
107.2	113.013	120.537
108.8	113.338	117.326
110.4	115.334	115.901
112	117.65	115.319
113.6	119.593	115.336
115.2	119.347	116.96
116.8	118.922	118.21
118.4	118.185	121.02
120	118.194	121.363
121.6	118.441	119.582
123.2	117.391	117.59
124.8	115.35	117.328
126.4	113.862	118.071
128	115.995	122.474
129.6	118.273	125.129
131.2	119.738	125.485
132.8	118.987	124.991
134.4	117.798	124.73
136	117.426	123.515
137.6	118.87	123.728
139.2	120.764	125.613
140.8	120.855	125.518
142.4	119.929	125.252
144	120.944	125.654
145.6	120.936	123.694
147.2	118.835	122.98
148.8	117.666	120.926
150.4	115.654	118.724
152	115.716	119.324
153.6	118.411	121.766
155.2	121.747	124.37
156.8	123.956	127.409
158.4	123.455	125.912
160	121.922	124.801
161.6	121.406	124.069
163.2	121.138	124.587
164.8	121.141	124.997
166.4	120.726	125.084
168	119.113	124.216
169.6	120.681	123.531
171.2	122.502	123.326
172.8	123.349	124.457
174.4	123.521	125.531
176	124.028	126.653
177.6	125.164	127.648
179.2	126.558	125.653
180.8	125.76	122.441
182.4	124.935	119.414
184	125.145	119.011
185.6	125.405	119.207
187.2	126.29	122.875
188.8	125.851	125.106
190.4	125.172	125.594
192	125.379	126.355
193.6	127.569	125.522
195.2	125.968	122.331
196.8	124.715	122.919
198.4	120.636	122.036
200	121.164	121.121
201.6	132.172	121.784
203.2	154.48	126.503
204.8	176.901	135.682
206.4	195.856	149.79
208	198.368	161.049
209.6	193.034	166.617
211.2	192.316	164.087
212.8	192.076	163.943
214.4	188.52	163.605
216	189.958	164.759
217.6	191.715	162.202
219.2	194.757	160.755
220.8	200.677	157.726
222.4	199.402	155.565
224	195.544	154.455
225.6	193.986	154.627
227.2	193.095	152.261
228.8	195.856	155.378
230.4	199.391	154.97
232	198.224	152.796
233.6	197.675	150.061
235.2	197.053	148.178
236.8	199.884	148.109
238.4	201.36	151.498
240	198.691	152.827
241.6	195.018	155.008
243.2	192.483	155.957
244.8	191.756	157.284
246.4	196.001	158.016
248	200.316	156.082
249.6	203.321	155.626
251.2	205.001	156.22
252.8	204.535	156.185
254.4	200.814	157.951
256	197.353	157.316
257.6	197.08	155.077
259.2	200.325	156.398
260.8	204.375	158.295
262.4	209.731	158.857
264	210.542	160.285
265.6	207.501	159.673
267.2	206.472	158.789
268.8	206.648	160.304
270.4	207.182	162.457
272	206.355	163.508
273.6	203.596	164.456
275.2	200.787	164.352
276.8	201.334	164.706
278.4	204.379	164.841
280	208.913	163.787
281.6	214.184	163.144
283.2	217.742	164.219
284.8	217.844	165.859
286.4	216.694	167.502
288	215.48	168.194
289.6	215.818	168.381
291.2	218.313	169.089
292.8	220.731	169.202
294.4	220.577	169.701
296	217.382	167.71
297.6	213.556	167.361
299.2	214.424	167.462
300.8	214.127	167.836
302.4	217.405	167.193
304	222.433	169.588
305.6	221.248	168.582
307.2	216.034	165.504
308.8	215.703	162.699
310.4	214.894	162.407
312	219.158	162.516
313.6	224.157	165.515
315.2	224.894	168.225
316.8	220.323	168.268
318.4	220.141	168.779
320	219.104	168.969
321.6	221.451	167.636
323.2	222.321	166.242
324.8	222.946	167.259
326.4	223.679	169.308
328	227.612	171.877
329.6	230.312	175.001
331.2	232.268	175.349
332.8	234.037	170.819
334.4	229.033	168.893
336	228.926	169.436
337.6	225	172.154
339.2	222.142	176.744
340.8	223.171	177.529
342.4	228.44	174.369
344	230.572	175.509
345.6	233.544	177.67
347.2	229.02	178.15
348.8	226.067	178.563
350.4	229.506	179.584
352	235.567	178.693
353.6	239.089	176.665
355.2	237.423	175.357
356.8	234.234	173.464
358.4	235.167	174.548
360	237.485	178.976
361.6	237.885	182.018
363.2	241.657	182.192
364.8	243.795	179.645
366.4	245.678	176.334
368	249.303	176.036
369.6	248.588	177.057
371.2	243.648	181.89
372.8	247.03	185.176
374.4	246.233	183.32
376	246.229	179.886
377.6	247.251	179.19
379.2	245.203	178.34
380.8	236.961	178.291
382.4	233.336	176.864
384	231.092	174.072
385.6	231.025	175.842
387.2	231.852	179.888
388.8	234.031	185.93
390.4	236.149	186.058
392	240.76	183.705
393.6	246.819	179.574
395.2	247.085	179.469
396.8	241.649	182.425
398.4	237.62	188.341
400	235.737	185.377
401.6	234.441	171.223
403.2	236.169	161.105
404.8	239.595	170.232
406.4	243.488	209.881
408	244.918	295.639
409.6	241.948	427.06
411.2	242.762	550.857
412.8	251.198	624.662
414.4	280.255	647.915
416	329.117	640.371
417.6	392.755	642.662
419.2	457.615	640.894
420.8	509.704	636.256
422.4	532.097	644.362
424	544.894	629.804
425.6	534.451	597.958
427.2	532.45	584.774
428.8	535.177	580.043
430.4	534.184	583.249
432	532.884	586.834
433.6	525.435	577.375
435.2	509.39	568.378
436.8	498.347	565.821
438.4	492.974	565.38
440	488.139	560.662
441.6	494.727	540.72
443.2	500.061	529.333
444.8	499.41	528.338
446.4	485.253	520.618
448	478.922	508.187
449.6	476.322	504.567
451.2	477.274	508.08
452.8	477.873	521.415
454.4	479.594	528.724
456	470.513	499.71
457.6	480.231	461.566
459.2	491.094	441.26
460.8	486.098	432.542
462.4	471.937	439.793
464	452.959	456.871
465.6	434.888	463.398
467.2	430.031	464.051
468.8	432.367	454.425
470.4	438.404	440.552
472	446.935	436.612
473.6	445.455	430.368
475.2	448.471	430.027
476.8	443.43	428.129
478.4	432.516	424.313
480	418.292	426.411
481.6	414.975	435.087
483.2	412.186	436.834
484.8	414.137	434.942
486.4	416.474	423.617
488	414.84	409.987
489.6	404.995	403.842
491.2	399.798	401.867
492.8	393.45	396.018
494.4	392.856	389.144
496	395.18	384.553
497.6	395.301	377.182
499.2	384.762	370.244
500.8	367.805	367.208
502.4	357.915	362.16
504	360.53	361.964
505.6	363.271	363.683
507.2	369.235	369.141
508.8	373.198	366.243
510.4	372.717	361.997
512	376.379	365.519
513.6	378.299	357.695
515.2	377.358	350.88
516.8	372.681	353.82
518.4	364.842	346.926
520	357.624	339.86
521.6	352.15	339.556
523.2	354.964	324.505
524.8	364.36	323.364
526.4	368.851	330.322
528	362.773	343.503
529.6	354.632	354.777
531.2	350.092	362.42
532.8	350.68	354.553
534.4	352.093	351.838
536	350.627	350.352
537.6	342.407	356.618
539.2	338.246	358.794
540.8	337.185	350.988
542.4	343.053	338.164
544	346.032	326.37
545.6	347.075	322.746
547.2	342.328	328.885
548.8	331.121	339.49
550.4	326.442	355.764
552	327.394	363.314
553.6	331.01	364.56
555.2	338.301	359.945
556.8	342.369	348.116
558.4	340.315	334.838
560	345.07	340.441
561.6	344.202	332.974
563.2	346.812	316.002
564.8	349.424	304.969
566.4	346.288	302.592
568	349.888	307.373
569.6	347.019	324.968
571.2	342.185	334.216
572.8	340.849	324.248
574.4	340.718	322.138
576	330.457	328.016
577.6	324.807	331.313
579.2	314.654	336.134
580.8	314.881	336.752
582.4	320.892	330.502
584	328.871	327.962
585.6	329.479	327.723
587.2	330.116	330.755
588.8	328.577	331.462
590.4	332.495	330.492
592	331.497	328.739
593.6	333.07	331.724
595.2	335.143	337.731
596.8	338.972	344.882
598.4	337.058	342.772
600	333.851	342.553
601.6	328.792	339.827
603.2	327.985	339.088
604.8	331.793	340.162
606.4	329.485	340.556
608	336.689	338.968
609.6	339.312	334.975
611.2	343.495	325.651
612.8	343.339	318.407
614.4	337.791	320.975
616	326.247
617.6	326.532
619.2	323.174
620.8	319.633
622.4	318.204
624
625.6
627.2
628.8
630.4
632
633.6
635.2
636.8
638.4
640
641.6
643.2
644.8
646.4
648
649.6
651.2
652.8
654.4
656
657.6
659.2
660.8
662.4
664
665.6
667.2
668.8
670.4
672
673.6
675.2
676.8
678.4
680
681.6
683.2
684.8
686.4
688
689.6
691.2
692.8
694.4
696
697.6
699.2
700.8
702.4
704
705.6
707.2
708.8
710.4
712
713.6
715.2
716.8
718.4
720
721.6
723.2
724.8
726.4
728
729.6
731.2
732.8
734.4
736
737.6
739.2
740.8
742.4
744
745.6
747.2
748.8
750.4
752
753.6
755.2
756.8
758.4
760
761.6
763.2
764.8
766.4
768
769.6
771.2
772.8
774.4
776
777.6
779.2
780.8
782.4
784
785.6
787.2
788.8
790.4
792
793.6
795.2
796.8
798.4
800
801.6
803.2
804.8
806.4
808
809.6

## Sheet: Figure 5G
	With ATc	No ATc
0	75.526	95.312				With ATc					No ATc
1.6	74.189	96.934				118.905	103.15	148.978			234.446	280.601	207.613
3.2	74.027	98.778
4.8	74.072	99.259
6.4	75.563	97.647
8	75.349	95.732
9.6	75.388	94.103
11.2	73.848	91.548
12.8	73.983	90.18
14.4	74.555	92.333
16	75.417	94.472
17.6	76.27	98.088
19.2	76.169	100.503
20.8	75.129	99.471
22.4	75.491	97.092
24	75.896	97.72
25.6	76.722	97.763
27.2	78.072	98.102
28.8	77.938	98.821
30.4	76.905	98.827
32	77.157	100.103
33.6	78.702	102.538
35.2	81.026	102.584
36.8	82.373	102.651
38.4	81.671	100.806
40	79.372	100.228
41.6	77.679	98.837
43.2	75.626	98.216
44.8	76.589	98.491
46.4	77.572	99.615
48	78.521	99.732
49.6	80.2	101.999
51.2	82.757	101
52.8	81.054	100.572
54.4	79.289	101.843
56	77.477	102.271
57.6	76.413	101.011
59.2	77.2	102.419
60.8	79.712	103.554
62.4	79.298	104.531
64	78.428	104.623
65.6	77.616	103.191
67.2	76.725	100.32
68.8	76.196	99.922
70.4	76.758	100.429
72	78.551	100.343
73.6	81.321	101.057
75.2	82.132	101.109
76.8	83.243	99.869
78.4	82.434	99.675
80	81.687	100.145
81.6	82.03	100.319
83.2	80.24	101.792
84.8	78.972	103.364
86.4	79.498	104.07
88	80.079	104.498
89.6	81.859	102.944
91.2	82.017	101.745
92.8	80.777	101.351
94.4	80.4	101.43
96	80.529	102.186
97.6	80.494	103.441
99.2	79.663	103.33
100.8	78.911	104.808
102.4	79.455	106.439
104	80.481	104.59
105.6	81.829	103.212
107.2	81.426	100.925
108.8	79.497	99.924
110.4	80.041	100.434
112	81.702	101.969
113.6	85.352	101.649
115.2	85.418	103.596
116.8	84.578	103.184
118.4	81.569	102.223
120	79.784	100.929
121.6	79.758	99.951
123.2	81.733	101.416
124.8	81.977	104.599
126.4	83.786	107.099
128	84.849	107.597
129.6	84.739	107.934
131.2	83.124	105.075
132.8	82.631	104.219
134.4	80.657	102.519
136	80.82	102.251
137.6	82.257	103.22
139.2	83.591	103.999
140.8	83.262	103.502
142.4	84.919	103.036
144	85.167	101.956
145.6	85.626	101.971
147.2	83.564	103.199
148.8	84.733	103.338
150.4	84.187	104.057
152	83.87	104.006
153.6	82.399	103.315
155.2	80.721	105.09
156.8	80.731	108.059
158.4	83.739	109.532
160	86.466	108.361
161.6	87.864	105.444
163.2	87.833	102.846
164.8	84.876	103.452
166.4	83.045	105.32
168	81.123	106.438
169.6	81.482	105.291
171.2	83.615	104.188
172.8	86.536	103.583
174.4	86.024	104.542
176	85.791	105.293
177.6	84.474	105.692
179.2	82.968	104.857
180.8	81.992	103.892
182.4	82.465	102.608
184	84.665	102.143
185.6	88.299	101.464
187.2	88.412	102.781
188.8	87.996	103.533
190.4	86.952	103.924
192	84.731	104.335
193.6	84.438	103.426
195.2	84.601	102.93
196.8	83.825	103.011
198.4	85.791	101.373
200	87.966	100.367
201.6	88.152	101.858
203.2	89.922	104.02
204.8	90.18	105.105
206.4	90.053	104.873
208	90.606	105.328
209.6	90.791	108.676
211.2	91.425	114.222
212.8	93.714	120.77
214.4	94.36	127.347
216	96.234	135.546
217.6	99.744	143.989
219.2	103.225	152.248
220.8	106.925	157.745
222.4	108.711	162.931
224	110.974	171.141
225.6	114.605	182.635
227.2	117.958	193.818
228.8	120.634	202.193
230.4	122.877	206.646
232	122.521	212.049
233.6	123.708	222.51
235.2	127.716	230.844
236.8	130.204	238.161
238.4	132.528	243.377
240	134.965	243.862
241.6	138.649	250.746
243.2	139.241	260.613
244.8	143.936	265.173
246.4	147.489	270.37
248	150.307	278.372
249.6	152.151	285.62
251.2	153.273	293.977
252.8	153.716	295.964
254.4	156.344	297.926
256	157.014	301.157
257.6	159.098	303.114
259.2	160.88	304.687
260.8	163.91	308.881
262.4	170.797	311.441
264	174.159	315.62
265.6	175.954	319.966
267.2	174.46	315.721
268.8	170.953	309.809
270.4	173.104	308.246
272	178.697	310.648
273.6	181.76	317.136
275.2	187.405	327.806
276.8	189.214	328.736
278.4	185.63	327.455
280	182.951	321.917
281.6	181.461	322.361
283.2	182.524	330.44
284.8	184.153	335.887
286.4	185.148	336.354
288	185.572	328.064
289.6	185.389	313.231
291.2	186.872	309.012
292.8	189.917	315.463
294.4	190.591	322.019
296	190.128	333.862
297.6	193.353	339.528
299.2	198.273	339.179
300.8	203.126	335.709
302.4	203.315	332.318
304	204.718	326.939
305.6	204.556	332.929
307.2	202.327	331.131
308.8	205.172	324.811
310.4	204.388	312.69
312	205.013	304.294
313.6	208.688	307.792
315.2	211.439	321.596
316.8	210.072	327.761
318.4	212.255	328.783
320	211.546	331.278
321.6	215.217	330.56
323.2	211.316	335.246
324.8	208.15	335.272
326.4	205.191	335.003
328	204.777	329.424
329.6	205.996	333.66
331.2	213.019	336.922
332.8	214.469	342.351
334.4	216.411	348.8
336	217.257	348.898
337.6	222.693	346.375
339.2	230.58	351.929
340.8	235.178	357.449
342.4	235.493	357.389
344	227.535	353.563
345.6	216.287	348.705
347.2	210.589	344.649
348.8	211.753	346.146
350.4	211.821	352.605
352	217.854	349.979
353.6	222.04	346.988
355.2	221.093	351.994
356.8	216.469	348.143
358.4	212.545	342.527
360	209.477	342.227
361.6	214.257	340.798
363.2	217.434	346.749
364.8	220.338	365.331
366.4	221.832	373.04
368	225.622	365.6
369.6	229.805	356.408
371.2	228.039	351.189
372.8	219.081	354.199
374.4	214.94	364.869
376	213.282	370.864
377.6	217.783	359.559
379.2	221.406	353.674
380.8	223.694	354.276
382.4	223.763	356.352
384	224.466	355.938
385.6	220.345	353.94
387.2	218.917	351.994
388.8	216.25	356.436
390.4	216.528	362.319
392	221.549	361.476
393.6	227.764	356.484
395.2	228.125	351.455
396.8	231.826	355.253
398.4	235.526	360.407
400	231.191	362.215
401.6	231.454	356.578
403.2	226.245	352.237
404.8	221.242	357.918
406.4	218.15	363.022
408	217.603	366.064
409.6	223.029	368.016
411.2	234.52	361.954
412.8	230.714	362.079
414.4	227.873	365.851
416	221.417	366.669
417.6	216.321	364.774
419.2	220.102	368.92
420.8	225.774	366.313
422.4	222.832	369.545
424	222.726	367.684
425.6	216.324	369.097
427.2	215.809	366.806
428.8	218.959	365.932
430.4	222.945	366.902
432	225.638	372.836
433.6	230.9	376.891
435.2	224.643	375.411
436.8	222.708	369.501
438.4	223.954	367.375
440	219.753	369.687
441.6	217.96	371.299
443.2	220.108	369.064
444.8	217.146	360.047
446.4	220.33	360.337
448	227.321	368.576
449.6	224.501	373.825
451.2	229.908	369.804
452.8	231.312	360.197
454.4	227.159	349.89
456	224.141	351.445
457.6	223.064	359.833
459.2	223.132	368.23
460.8	228.133	369.614
462.4	233.76	373.412
464	242.426
465.6	247.902
467.2	258.743
468.8
470.4
472
473.6
475.2
476.8
478.4
480
481.6
483.2
484.8
486.4
488
489.6
491.2
492.8
494.4
496
497.6
499.2
500.8
502.4
504
505.6
507.2
508.8
510.4
512
513.6
515.2
516.8
518.4
520
521.6
523.2
524.8
526.4
528
529.6
531.2
532.8
534.4
536
537.6
539.2
540.8
542.4
544
545.6
547.2
548.8
550.4
552
553.6
555.2
556.8
558.4
560
561.6
563.2
564.8
566.4
568
569.6
571.2
572.8
574.4
576
577.6
579.2
580.8
582.4
584
585.6
587.2
588.8
590.4
592
593.6
595.2
596.8
598.4
600
601.6
603.2
604.8
606.4
608
609.6
611.2
612.8
614.4
616
617.6
619.2
620.8
622.4
624
625.6
627.2
628.8
630.4
632
633.6
635.2
636.8
638.4
640
641.6
643.2
644.8
646.4
648
649.6
651.2
652.8
654.4
656
657.6
659.2
660.8
662.4
664
665.6
667.2
668.8
670.4
672
673.6
675.2
676.8
678.4
680
681.6
683.2
684.8
686.4
688
689.6
691.2
692.8
694.4
696
697.6
699.2
700.8
702.4
704
705.6
707.2
708.8
710.4
712
713.6
715.2
716.8
718.4
720
721.6
723.2
724.8
726.4
728
729.6
731.2
732.8
734.4
736
737.6
739.2
740.8
742.4
744
745.6
747.2
748.8
750.4
752
753.6
755.2
756.8
758.4
760
761.6
763.2
764.8
766.4
768
769.6
771.2
772.8
774.4
776
777.6
779.2
780.8
782.4
784
785.6
787.2
788.8
790.4
792
793.6
795.2
796.8
798.4
800
801.6
803.2
804.8
806.4
808
809.6

## Sheet: Figure 5H
		With ATc	No ATc
	0	81.019	106.509			With ATc					No ATc
	1.6	81.081	104.988			239.817	144.962	283.1			464.063	503.592	385.158
	3.2	82.696	105.16
	4.8	83.594	105.981
	6.4	83.545	108.765
	8	80.846	108.708
	9.6	79.05	107.97
	11.2	78.604	106.712
	12.8	81.993	105.383
	14.4	85.899	103.538
	16	87.413	102.782
	17.6	87.229	102.653
	19.2	83.485	105.476
	20.8	79.684	106.728
	22.4	81.033	107.186
	24	84.225	106.369
	25.6	86.385	106.806
	27.2	88.393	107.104
	28.8	89.429	109.031
	30.4	88.733	109.561
	32	88.016	108.259
	33.6	87.933	107.867
	35.2	87.378	109.235
	36.8	88.068	109.385
	38.4	89.844	110.726
	40	89.788	109.835
	41.6	89.791	107.113
	43.2	91.016	105.744
	44.8	90.354	105.915
	46.4	89.814	108.024
	48	87.28	110.33
	49.6	85.345	112.248
	51.2	85.768	113.483
	52.8	86.928	113.103
	54.4	87.8	113.665
	56	88.087	115.799
	57.6	87.781	115.957
	59.2	87.705	115.263
	60.8	87.534	114.766
	62.4	88.32	113.176
	64	88.768	114.294
	65.6	87.895	116.234
	67.2	86.879	116.689
	68.8	85.271	116.164
	70.4	86.571	115.628
	72	90.322	114.294
	73.6	90.971	115.121
	75.2	91.612	114.92
	76.8	90.35	115.441
	78.4	89.524	116.257
	80	90.95	115.807
	81.6	90.26	115.631
	83.2	87.575	117.807
	84.8	87.229	118.529
	86.4	87.786	118.827
	88	88.331	118.071
	89.6	88.655	116.008
	91.2	89.628	116.242
	92.8	89.081	119
	94.4	89.555	120.188
	96	90.65	120.136
	97.6	90.192	120.199
	99.2	91.837	119.008
	100.8	94.561	118.379
	102.4	93.92	119.872
	104	92.501	119.818
	105.6	89.211	119.916
	107.2	87.604	120.746
	108.8	85.954	120.413
	110.4	85.844	118.454
	112	87.034	117.736
	113.6	88.128	116.797
	115.2	88.157	116.977
	116.8	88.666	116.446
	118.4	90.182	116.403
	120	94.194	117.16
	121.6	95.353	118.823
	123.2	95.382	121.31
	124.8	94.017	122.571
	126.4	93.149	120.95
	128	94.433	120.269
	129.6	95.238	121.053
	131.2	92.921	120.534
	132.8	90.707	121.292
	134.4	87.941	120.091
	136	89.397	117.551
	137.6	90.127	116.281
	139.2	91.634	116.574
	140.8	93.33	117.323
	142.4	93.415	119.755
	144	91.96	121.029
	145.6	92.084	122.812
	147.2	91.512	122.824
	148.8	92.249	122.649
	150.4	92.985	123.091
	152	91.643	122.565
	153.6	90.495	122.511
	155.2	90.335	122.541
	156.8	90.228	121.649
	158.4	91.079	122.271
	160	92.717	122.885
	161.6	91.943	123.223
	163.2	93.411	122.506
	164.8	94.629	120.691
	166.4	92.749	119.583
	168	91.212	120.263
	169.6	91.729	120.113
	171.2	91.913	120.476
	172.8	91.101	120.231
	174.4	90.307	120.649
	176	88.245	120.808
	177.6	88.672	120.35
	179.2	89.548	118.541
	180.8	91.324	117.847
	182.4	92.719	118.722
	184	94.13	120.617
	185.6	92.633	121.574
	187.2	94.521	122.133
	188.8	94.989	121.546
	190.4	94.709	120.183
	192	97.372	121.359
	193.6	97.838	122.031
	195.2	95.207	122.858
	196.8	93.846	123.958
	198.4	93.85	124.715
	200	95.5	123.139
	201.6	97.284	122.986
	203.2	93.067	120.996
	204.8	95.409	121.079
	206.4	105.629	119.018
	208	121.388	122.422
	209.6	142.361	130.804
	211.2	150.952	140.634
	212.8	138.203	146.55
	214.4	130.373	149.062
	216	128.946	143.758
	217.6	129.875	139.899
	219.2	133.976	139.219
	220.8	135.183	138.758
	222.4	130.296	136.941
	224	128.355	136.237
	225.6	128.848	135.859
	227.2	129.351	134.127
	228.8	131.401	132.365
	230.4	132.427	131.43
	232	131.614	130.968
	233.6	129.757	129.922
	235.2	129.083	130.573
	236.8	126.714	130.805
	238.4	127.489	130.368
	240	125.695	130.441
	241.6	126.503	129.724
	243.2	126.361	128.423
	244.8	126.783	129.803
	246.4	127.966	130.296
	248	130.402	130.094
	249.6	129.234	131.578
	251.2	131.276	130.747
	252.8	132.08	130.572
	254.4	133.005	131.734
	256	134.501	130.441
	257.6	135.673	127.83
	259.2	134.397	127.494
	260.8	134.289	128.143
	262.4	131.196	129.837
	264	128.187	133.151
	265.6	128.14	135.894
	267.2	130.012	136.862
	268.8	133.497	136.805
	270.4	138.562	137.38
	272	139.882	136.181
	273.6	136.842	135.685
	275.2	135.034	136.013
	276.8	134.439	137.195
	278.4	135.086	138.473
	280	137.891	137.429
	281.6	139.156	135.632
	283.2	138.589	135.826
	284.8	136.292	137.017
	286.4	134.673	138.045
	288	134.202	140.055
	289.6	136.052	138.192
	291.2	138.236	138.498
	292.8	138.964	140.458
	294.4	138.349	143.355
	296	136.776	144.895
	297.6	137.377	145.55
	299.2	141.062	143.635
	300.8	143.994	142.525
	302.4	146.58	141.159
	304	147.92	142.015
	305.6	146.275	141.695
	307.2	143.134	140.744
	308.8	142.034	143.445
	310.4	137.999	146.506
	312	138.344	147.765
	313.6	141.43	151.162
	315.2	141.535	149.762
	316.8	140.617	145.713
	318.4	143.003	145.024
	320	142.926	145.194
	321.6	144.641	145.611
	323.2	146.94	147.09
	324.8	143.987	146.644
	326.4	139.96	143.55
	328	141.897	140.817
	329.6	144.902	142.365
	331.2	149.272	146.541
	332.8	150.594	149.258
	334.4	149.35	151.628
	336	149.519	150.369
	337.6	145.788	146.774
	339.2	143.278	145.524
	340.8	141.519	145.669
	342.4	139.902	146.798
	344	141.576	148.483
	345.6	148.239	149.701
	347.2	147.274	150.017
	348.8	148.254	148.801
	350.4	149.222	147.518
	352	150.861	147.08
	353.6	150.775	146.452
	355.2	148.007	146.863
	356.8	145.368	147.547
	358.4	144.589	145.767
	360	144.583	145.938
	361.6	144.453	145.957
	363.2	146.884	147.011
	364.8	147.42	148.174
	366.4	148.351	149.12
	368	148.808	147.503
	369.6	151.913	147.703
	371.2	151.511	146.983
	372.8	154.715	147.778
	374.4	156.089	149.42
	376	152.379	151.808
	377.6	150.154	153.038
	379.2	150.482	153.061
	380.8	146.805	151.519
	382.4	148.585	151.07
	384	152.592	151.118
	385.6	154.498	151.769
	387.2	155.668	153.372
	388.8	153.799	153.06
	390.4	149.931	151.507
	392	150.824	149.471
	393.6	153.628	147.961
	395.2	154.235	148.225
	396.8	152.059	151.269
	398.4	149.627	153.361
	400	148.631	154.472
	401.6	151.334	152.359
	403.2	155.389	150.097
	404.8	158.079	149.621
	406.4	156.911	151.706
	408	152.747	152.799
	409.6	149.526	155.213
	411.2	147.218	152.937
	412.8	144.252	150.121
	414.4	146.059	150.094
	416	149.268	151.421
	417.6	152.196	153.772
	419.2	157.275	154.794
	420.8	159.662	155.321
	422.4	157.031	155.75
	424	155.009	157.569
	425.6	154.908	163.69
	427.2	155.025	173.719
	428.8	156.254	181.102
	430.4	156.535	192.064
	432	157.496	202.334
	433.6	160.351	214.896
	435.2	163.233	229.329
	436.8	166.575	246.559
	438.4	166.662	262.323
	440	166.728	280.995
	441.6	169.267	298.405
	443.2	175.006	314.349
	444.8	179.775	329.393
	446.4	188.504	346.002
	448	193.18	363.612
	449.6	199.59	387.738
	451.2	205.931	409.204
	452.8	211.004	420.724
	454.4	213.875	429.987
	456	222.028	436.227
	457.6	226.773	444.037
	459.2	234.861	452.916
	460.8	241.541	473.665
	462.4	240.865	492.783
	464	244.287	505.115
	465.6	251.28	516.015
	467.2	260.634	529.566
	468.8	268.798	546.318
	470.4	273.751	567.556
	472	268.642	582.447
	473.6	268.205	582.845
	475.2	263.867	577.394
	476.8	270.785	582.779
	478.4	280.803	588.494
	480	295.823	600.356
	481.6	305.253	603.562
	483.2	304.642	593.07
	484.8	301.454	596.835
	486.4	309.82	603.693
	488	321.125	603.995
	489.6	323.895	605.714
	491.2	328.522	597.426
	492.8	326.073	587.885
	494.4	332.875	593.639
	496	343.451	604.681
	497.6	358.079	611.995
	499.2	356.778	601.665
	500.8	351.749	588.874
	502.4	343.333	583.699
	504	347.114	582.541
	505.6	349.451	588.568
	507.2	366.18	588.816
	508.8	371.263	594.055
	510.4	360.194	601.873
	512	351.386	611.022
	513.6	352.65	612.385
	515.2	351.312	604.615
	516.8	357.301	591.205
	518.4	359.43	594.926
	520	355.792	601.749
	521.6	364.053	608.249
	523.2	367.825	616.103
	524.8	371.713	622.59
	526.4	374.556	618.74
	528	381.046	607.336
	529.6	378.054	587.593
	531.2	373.874	562.916
	532.8	376.963	553.427
	534.4	387.329	563.201
	536	394.489	577.097
	537.6	399.701	597.052
	539.2	395.861	609.59
	540.8	388.36	606.178
	542.4	394.5	607.388
	544	396.072	602.934
	545.6	388.64	590.517
	547.2	384.605	586.698
	548.8	387.056	590.64
	550.4	399.956	603.054
	552	403.499	612.584
	553.6	403.144	604.592
	555.2	393.592	589.903
	556.8	385.18	581.437
	558.4	382.045	581.607
	560	383.928	601.206
	561.6	377.519	602.758
	563.2	375.471	593.571
	564.8	379.507	590.786
	566.4	385.932	587.229
	568	390.072	589.866
	569.6	395.013	610.025
	571.2	399.984	603.859
	572.8	398.913	594.862
	574.4	396.23	593.928
	576	390.971	586.459
	577.6	377.5	584.136
	579.2	364.208	595.832
	580.8	367.245	593.084
	582.4	373.534	579.121
	584	379.514	569.806
	585.6	385.925	569.873
	587.2	389.079	588.102
	588.8	383.108	615.89
	590.4	375.279	617.985
	592	375.591	600.406
	593.6	372.836	583.929
	595.2	369.206	590.52
	596.8	364.237	611.601
	598.4	361.52	621.181
	600	355.311	600.514
	601.6	354.931	582.636
	603.2	353.559	583.332
	604.8	364.134	592.616
	606.4	371.54	596.001
	608	385.896	606.663
	609.6	392.933	609.886
	611.2	382.646	601.287
	612.8	370.17	608.276
	614.4	362.574	608.981
	616	361.125	597.518
	617.6	365.75	602.363
	619.2	368.464	609.67
	620.8	370.121	601.358
	622.4	367.799	621.771
	624	359.645	633.728
	625.6	357.22	630.876
	627.2	344.504	629.846
	628.8	341.349	623.593
	630.4	351.192	624.675
	632	363.661	642.338
	633.6	360.661	637.286
	635.2		616.035
	636.8		594.677
	638.4		585.082
	640		594.273
	641.6		617.435
	643.2		645.005
	644.8		636.207
	646.4		612.445
	648		598.532
	649.6		584.114
	651.2		577.52
	652.8		585.909
	654.4		580.004
	656		580.093
	657.6		594.506
	659.2		603.238
	660.8		603.335
	662.4		609.634
	664		605.34
	665.6		597.417
	667.2		606.962
	668.8		604.773
	670.4		595.898
	672		593.652
	673.6		595.358
	675.2		600.031
	676.8		611.009
	678.4		602.288
	680		599.354
	681.6		597.866
	683.2		590.246
	684.8		597.777
	686.4		605.558
	688		605.544
	689.6		614.696
	691.2		623.434
	692.8		612.702
	694.4		617.074
	696		614.043
	697.6		599.466
	699.2		594.419
	700.8		605.074
	702.4		621.5
	704		642.593
	705.6		647.524
	707.2		643.512
	708.8		645.412
	710.4		646.577
	712		640.329
	713.6		633.772
	715.2		638.863
	716.8		640.245
	718.4		643.01
	720		635.523
	721.6		621.304
	723.2		606.264
	724.8		619.499
	726.4		628.717
	728		626.971
	729.6		627.598
	731.2		641.786
	732.8		646.744
	734.4		658.765
	736		665.919
	737.6		640.163
	739.2		613.737
	740.8		618.413
	742.4
	744
	745.6
	747.2
	748.8
	750.4
	752
	753.6
	755.2
	756.8
	758.4
	760
	761.6
	763.2
	764.8
	766.4
	768
	769.6
	771.2
	772.8
	774.4
	776
	777.6
	779.2
	780.8
	782.4
	784
	785.6
	787.2
	788.8
	790.4
	792
	793.6
	795.2
	796.8
	798.4
	800
	801.6
	803.2
	804.8
	806.4
	808
	809.6
