# Supplementary material for: Calcium transfer from the ER to other organelles for optimal signaling in Toxoplasma gondii
Source: eLife. 2025 Nov 12;13:RP101894. doi: 10.7554/eLife.101894 (PMC12611264; doi:10.7554/eLife.101894)
Supplement: Figure 5—source data 1. [file elife-101894-fig5-data1.xlsx]

## Sheet: Figure 5B
		0	0.25	0.5	1	10	50	100	200	(μM)
	0	100.815	101.569	101.337	100.991	99.9276	100.467	100.682	100.92
	1	100.682	101.569	101.52	101.223	100.651	100.418	101.522	100.867
	2	100.726	101.771	101.748	101.455	101.013	100.37	101.769	101.026
	3	100.948	101.923	101.886	101.918	101.148	100.224	101.671	100.973
	4	101.213	101.771	101.703	102.335	101.42	100.078	101.275	101.026
	5	101.479	101.417	101.291	102.567	101.601	100.272	100.979	100.92
	6	101.39	101.215	101.153	102.242	101.601	100.321	101.028	100.18
	7	100.77	101.215	100.833	102.103	101.329	100.321	100.731	99.9154
	8	100.815	101.366	100.787	101.316	101.013	100.029	101.028	100.021
	9	100.859	101.063	100.879	101.223	100.968	99.9319	101.176	100.444
	10	101.169	100.86	100.925	101.038	101.284	99.9319	100.88	100.762
	11	101.302	100.709	100.696	101.13	101.013	100.078	100.83	100.92
	12	101.257	100.709	100.742	101.223	101.103	100.418	101.127	100.92
	13	100.903	100.962	101.199	101.316	100.968	100.37	100.781	101.079
	14	100.549	101.366	101.748	101.362	100.968	100.37	101.028	100.867
	15	100.903	101.215	102.115	101.547	101.103	100.37	100.979	100.867
	16	100.77	101.822	101.977	101.316	101.194	100.321	100.435	100.497
	17	100.549	101.873	101.657	101.316	100.742	100.564	100.04	100.603
	18	100.638	101.822	101.291	101.177	100.877	100.759	100.682	100.656
	19	100.549	101.619	101.153	101.269	100.47	100.759	100.929	101.026
	20	100.593	101.366	101.245	101.779	100.742	100.613	101.374	101.079
	21	101.169	100.911	101.153	101.825	101.058	100.175	101.424	101.079
	22	101.434	101.417	100.833	101.779	101.148	99.786	101.176	100.762
	23	101.434	101.113	100.696	101.501	101.239	99.7374	100.88	100.603
	24	101.169	101.063	100.696	101.13	100.877	99.9319	101.028	100.603
	25	100.903	101.063	100.696	100.945	100.289	99.9805	101.226	101.026
	26	100.948	101.366	100.742	100.621	100.289	100.126	100.979	100.762
	27	100.948	101.468	100.879	100.991	100.335	100.272	100.929	100.709
	28	101.125	101.366	100.879	101.223	100.606	100.37	100.583	100.338
	29	101.169	100.962	100.879	101.362	100.922	100.321	100.633	100.286
	30	101.125	100.911	101.062	101.547	100.968	100.759	100.484	100.338
	31	101.036	101.569	101.245	101.408	101.013	100.807	100.583	100.391
	32	101.213	101.822	100.925	100.991	101.058	100.953	100.484	100.338
	33	101.169	101.822	101.199	101.084	100.742	100.759	100.682	100.55
	34	100.992	101.164	101.245	101.038	100.832	100.175	100.336	100.603
	35	100.992	101.012	100.97	101.223	100.832	99.8347	100.633	100.444
	36	101.125	100.86	100.97	101.501	100.47	99.9805	100.83	100.286
	37	100.903	101.265	100.925	101.269	100.38	99.9319	100.534	100.233
	38	100.859	101.012	100.833	101.223	100.516	99.9805	100.385	100.391
	39	100.992	101.164	101.062	100.806	100.063	100.029	100.435	100.973
	40	100.682	101.113	101.062	100.204	100.244	99.8833	99.9901	101.238
	41	101.125	101.468	100.833	100.389	100.425	99.9319	100.287	101.132
	42	100.992	101.164	100.513	100.713	100.425	100.37	100.682	100.762
	43	100.682	101.316	100.375	101.084	100.561	100.856	100.484	100.603
	44	100.859	101.113	100.513	101.686	100.651	100.856	100.336	100.338
	45	100.859	100.81	100.513	101.501	100.335	100.807	100.484	100.444
	46	100.239	100.709	100.787	101.455	100.018	100.37	99.8913	100.55
	47	100.46	100.456	100.879	101.594	99.9729	99.786	100.04	100.444
	48	100.062	100.456	100.742	101.269	100.38	99.4943	100.484	100.074
	49	100.018	100.557	100.787	101.223	100.38	99.8833	100.583	99.9683
	50	100.549	100.962	100.879	100.806	100.47	100.126	100.534	99.7038
	51	100.815	101.215	100.787	100.482	101.058	100.467	100.484	100.18
	52	100.505	101.316	101.062	100.621	100.922	100.321	99.7924	100.55
	53	100.328	101.366	100.97	101.084	100.832	100.078	99.8913	100.867
	54	100.505	101.265	100.925	101.455	100.651	99.8833	100.237	100.709
	55	100.239	100.506	100.97	101.316	100.561	100.029	100.633	100.444
	56	100.549	100.456	101.016	101.13	100.154	100.467	100.781	100.021
	57	100.77	100.253	100.833	100.76	100.651	100.516	100.534	100.021
	58	100.992	99.8988	100.421	100.621	100.696	100.516	100.089	99.8625
	59	100.903	100.253	100.101	100.621	100.832	100.272	99.8418	99.7038
	60	101.08	100.658	100.009	100.852	100.832	99.9319	99.8913	99.4393
	61	100.549	101.113	100.329	100.899	101.148	99.6888	100.435	99.7567
	62	100.682	101.923	100.925	101.13	100.922	99.786	100.138	100.127
	63	100.682	101.873	101.245	101.408	100.922	99.5429	100.04	100.286
	64	100.859	101.518	101.016	101.408	100.742	100.418	99.9407	100.497
	65	100.638	101.316	100.879	100.852	100.787	100.759	99.9407	100.233
	66	100.682	101.012	100.696	100.713	100.696	100.661	100.188	99.9683
	67	100.416	100.607	100.787	100.574	100.742	100.759	100.287	100.021
	68	100.549	100.405	100.833	100.76	100.696	100.126	99.8418	100.074
	69	100.682	100.051	101.016	101.362	100.742	99.786	99.9407	100.074
	70	100.948	100.304	100.833	101.408	100.425	100.029	99.9407	99.8096
	71	100.549	100.405	100.742	101.177	100.742	99.9805	100.435	99.4393
	72	100.46	100.506	100.467	100.621	100.651	99.7374	100.979	99.4922
	73	99.9292	100.354	100.558	100.296	100.244	99.8833	100.88	99.3335
	74	99.4421	100.101	100.513	100.528	100.244	99.6402	100.682	99.598
	75	99.5307	100.202	100.558	100.574	100.289	100.126	100.583	99.8625
	76	99.7963	100.658	100.421	100.343	99.9276	100.321	100.089	100.021
	77	99.7521	100.607	100.558	100.806	100.335	100.71	99.8913	99.9683
	78	100.018	101.063	100.284	100.945	100.289	100.71	100.138	100.497
	79	100.549	101.164	100.192	100.945	100.199	100.37	100.237	100.444
	80	100.682	101.063	100.329	101.084	100.47	100.078	100.435	100.286
	81	100.859	100.962	100.284	100.482	100.425	100.078	100.237	100.127
	82	100.549	100.962	100.147	99.7406	100.38	99.9805	100.138	99.9683
	83	99.9734	100.759	100.375	100.065	99.8372	100.078	100.237	99.598
	84	99.4864	100.962	100.238	100.204	99.6564	99.8347	100.04	100.074
	85	99.3536	100.81	100.101	99.9259	99.7016	99.3484	99.7924	100.18
	86	99.4421	100.607	100.604	100.019	101.013	99.4456	99.9901	100.444
	87	99.6192	100.456	100.787	99.7406	101.827	99.3484	100.188	100.338
	88	100.15	100.607	100.65	100.157	102.369	99.2511	100.435	100.021
	89	100.416	100.506	100.742	100.899	101.601	99.5915	100.633	99.7567
	90	100.416	100.557	100.742	100.991	101.103	99.8833	100.484	99.6509
	91	100.239	100.354	100.421	100.76	100.38	99.7374	99.8913	99.6509
	92	99.8406	100.051	100.375	100.389	100.877	99.8347	100.04	100.233
	93	99.7078	100.101	100.147	99.9722	100.742	99.4943	99.9407	100.233
	94	99.8406	100.101	100.147	100.111	100.425	99.7374	99.8913	100.497
	95	100.018	100.051	100.055	100.019	99.7468	100.078	99.9407	100.338
	96	100.195	99.8482	99.9176	99.8795	99.3851	100.418	100.336	99.4922
	97	100.239	99.8988	99.7345	100.019	99.7016	100.272	99.8913	99.4393
	98	99.8849	99.7976	99.643	99.9259	99.7016	99.8833	99.9407	99.9683
	99	100.15	99.9494	99.643	100.389	99.6111	99.8347	100.04	100.286
	100	100.018	100.202	99.8261	100.76	100.154	100.564	100.682	101.185
	101	100.15	100.506	100.787	100.852	100.516	100.71	101.275	101.396
	102	100.283	100.405	101.199	101.038	100.742	101.585	101.819	101.714
	103	100.195	100.607	101.794	101.177	101.465	102.218	102.214	102.56
	104	100.46	101.164	101.977	101.316	101.465	102.218	103.203	103.618
	105	100.549	101.873	101.703	101.779	101.42	102.461	103.944	104.517
	106	100.283	102.429	101.703	101.594	102.053	102.752	104.883	105.839
	107	100.018	102.581	102.069	101.501	102.189	102.704	105.378	106.739
	108	99.9734	101.923	102.023	101.733	102.324	103.239	105.773	108.167
	109	99.6635	101.417	102.206	102.288	102.731	103.919	106.317	108.696
	110	100.106	101.012	102.16	103.03	102.912	104.552	107.108	109.806
	111	100.372	100.962	102.023	103.169	103.228	105.281	107.701	110.494
	112	100.46	101.417	102.435	102.798	103.862	105.573	109.233	111.552
	113	100.416	102.126	102.252	102.983	103.771	106.059	110.32	113.086
	114	100.505	102.075	102.481	103.586	104.042	105.913	111.309	114.62
	115	99.8406	102.379	102.435	104.049	104.359	106.497	112.1	115.254
	116	99.5307	101.873	102.389	104.003	104.088	107.275	112.891	116.524
	117	99.7521	101.619	102.298	103.678	104.223	108.053	113.237	117.317
	118	99.9292	101.67	102.526	103.586	105.263	108.345	114.324	118.058
	119	99.7521	101.923	102.389	103.678	105.76	108.588	114.818	119.327
	120	99.9734	101.873	102.572	103.771	106.032	108.685	115.609	120.279
	121	100.062	101.923	102.206	103.725	106.936	109.025	116.894	120.861
	122	99.9734	101.822	102.664	103.678	107.207	109.463	118.13	121.76
	123	100.239	101.822	102.847	103.956	107.117	110.29	118.822	122.395
	124	100.283	101.721	103.076	104.466	107.207	111.019	119.168	122.765
	125	99.9292	101.721	103.213	104.558	107.072	111.7	119.019	123.083
	126	99.8406	101.569	103.488	104.605	106.846	113.013	119.019	123.453
	127	100.062	101.113	103.625	104.744	107.795	114.18	119.612	124.035
	128	99.9734	101.366	103.991	105.161	108.338	114.666	120.403	124.775
	129	100.062	101.164	104.083	105.022	108.564	114.861	121.54	125.41
	130	100.062	101.417	103.9	105.531	108.88	115.104	122.281	125.674
	131	100.106	101.771	103.717	105.531	109.197	114.958	122.825	125.886
	132	100.062	101.721	103.534	105.856	109.785	115.396	123.023	126.15
	133	100.239	101.923	103.808	106.365	110.327	116.466	123.468	126.838
	134	99.8849	102.227	103.9	107.014	110.327	116.855	123.962	127.314
	135	99.7078	101.569	104.312	106.782	110.689	117.535	124.407	127.843
	136	99.8406	101.771	104.632	106.829	111.096	118.508	124.456	127.526
	137	100.106	101.873	104.632	106.782	110.825	118.8	125.395	127.843
	138	100.195	101.67	104.449	106.921	110.96	119.286	126.087	128.055
	139	100.15	102.024	104.449	107.384	111.277	119.626	126.532	128.478
	140	99.7078	101.873	104.357	107.848	111.503	119.675	127.076	128.901
	141	99.5307	101.873	104.769	107.894	112.317	120.016	127.323	129.113
	142	99.8406	102.48	104.952	107.662	112.995	120.55	127.125	128.848
	143	99.575	102.379	105.273	107.755	113.131	121.085	127.719	129.165
	144	99.6635	102.379	105.181	107.894	113.402	121.815	128.114	129.218
	145	99.6635	101.873	105.135	108.45	113.764	121.718	128.163	129.377
	146	99.9734	101.366	104.998	109.191	114.035	122.058	128.806	129.536
	147	100.283	101.468	105.181	109.423	114.713	122.009	128.954	129.747
	148	100.328	101.67	105.319	109.515	115.256	122.107	129.152	129.694
	149	99.7521	101.468	105.547	109.793	115.482	122.544	129.053	129.694
	150	99.1765	102.277	105.273	109.84	115.527	123.225	128.855	129.694
	151	98.9108	102.227	105.593	110.349	115.663	123.274	128.905	129.694
	152	99.2208	102.429	106.005	110.72	116.025	124.052	129.448	129.589
	153	99.3536	102.176	106.326	110.257	116.567	124.198	129.448	129.747
	154	99.6192	102.075	106.188	110.349	116.793	124.246	129.745	129.694
	155	99.8849	101.822	105.959	110.905	116.838	124.344	129.646	129.959
	156	99.6192	102.126	105.639	110.859	117.019	124.733	129.547	130.065
	157	99.3536	101.974	105.685	111.23	117.291	124.635	130.042	130.435
	158	99.5307	102.227	106.097	111.507	117.788	124.878	130.289	130.699
	159	99.5307	102.176	106.692	111.507	118.376	124.878	130.437	131.07
	160	99.3536	102.328	106.875	112.388	118.647	125.024	130.042	131.334
	161	99.1322	102.277	107.47	112.944	119.144	125.608	129.745	130.752
	162	98.9551	101.974	107.882	112.666	119.552	126.337	130.14	130.17
	163	98.778	102.024	107.653	112.249	119.461	126.629	130.289	130.17
	164	98.8223	102.277	107.241	112.527	119.642	126.629	130.239	130.117
	165	99.3093	102.834	107.195	112.897	120.049	126.824	130.536	130.594
	166	99.4864	102.733	107.47	113.685	119.958	127.018	130.338	131.175
	167	99.6635	102.885	108.156	114.055	120.275	127.213	130.338	131.175
	168	99.575	102.682	109.118	114.287	120.863	127.164	130.832	131.281
	169	99.6192	102.682	109.301	113.916	121.134	127.31	130.882	131.757
	170	99.3979	102.53	108.797	113.87	121.496	127.31	130.536	131.387
	171	99.7078	102.935	108.248	113.685	121.541	127.699	130.783	130.699
	172	99.6192	102.682	107.973	113.777	121.089	127.893	130.783	130.382
	173	100.018	102.429	107.882	113.731	120.863	128.088	130.733	130.699
	174	99.9734	102.581	108.339	114.194	121.27	127.699	130.635	130.752
	175	100.106	102.379	108.706	114.565	121.677	127.504	131.228	131.175
	176	99.7078	102.227	108.477	115.306	122.084	127.845	131.277	131.175
	177	99.5307	102.429	108.431	115.167	122.49	128.428	131.079	130.911
	178	98.8666	102.581	108.385	115.63	122.536	128.574	130.536	130.911
	179	98.6894	102.632	108.522	115.167	122.445	129.304	130.14	131.122
	180	98.6452	102.783	109.026	115.769	122.445	128.866	129.893	130.858
	181	98.6452	102.682	109.529	116.047	122.536	128.38	130.585	130.541
	182	98.8223	102.581	109.804	117.02	122.807	128.526	130.931	130.276
	183	99.3536	102.429	110.124	116.789	123.214	128.526	131.03	130.488
	184	99.1765	102.429	110.17	116.835	123.395	128.38	130.931	130.488
	185	99.0879	102.885	109.896	116.511	123.937	128.915	130.981	130.329
	186	98.778	102.783	110.17	116.974	124.028	129.012	131.03	130.435
	187	98.8223	102.986	110.124	116.696	124.299	128.769	130.684	130.435
	188	99.1765	102.935	110.445	117.113	124.435	128.526	130.338	130.488
	189	99.3093	102.429	110.811	117.113	124.661	128.185	130.635	130.594
	190	99.265	102.227	110.903	116.928	124.661	128.088	131.079	130.594
	191	99.3536	102.48	110.445	117.067	125.113	128.623	131.03	130.435
	192	99.1322	102.328	110.536	117.391	125.068	128.963	131.079	130.382
	193	99.0879	102.986	110.536	117.53	124.932	128.866	130.486	129.906
	194	98.9994	103.29	110.903	117.947	124.842	129.352	130.091	130.223
	195	98.7337	103.239	111.36	118.086	124.796	129.45	130.585	130.435
	196	98.5123	103.29	112.138	118.132	124.661	129.45	131.277	130.964
	197	98.7337	103.239	112.093	118.503	124.932	129.352	131.277	131.228
	198	99.0437	103.138	112.184	118.827	125.068	129.109	131.969	131.175
	199	99.0879	103.34	112.276	119.105	125.475	129.158	132.117	130.488
	200	99.3536	103.239	112.459	119.29	125.61	129.595	131.524	130.805
	201	99.3536	103.239	112.596	119.244	125.746	129.984	130.733	130.382
	202	99.1322	103.239	113.191	119.244	125.791	129.79	131.178	130.276
	203	99.1765	103.34	113.1	119.151	125.384	129.595	131.425	129.853
	204	99.3536	103.29	113.329	119.383	125.294	129.693	131.722	129.853
	205	99.575	103.087	113.557	119.29	125.837	129.45	132.068	129.906
	206	99.6192	102.733	113.969	119.244	126.153	129.498	131.425	130.699
	207	99.3536	102.783	114.015	119.568	126.424	129.741	130.437	130.964
	208	99.1765	103.036	113.832	119.939	126.515	129.595	130.733	131.281
	209	98.8666	103.391	113.511	119.892	126.153	129.644	131.03	130.594
	210	98.9551	103.441	113.374	119.939	126.379	129.595	130.832	130.329
	211	99.0437	103.391	113.191	120.031	126.696	129.158	130.832	129.906
	212	99.3536	102.885	113.329	119.939	127.012	129.109	130.338	129.589
	213	99.5307	103.087	113.924	120.356	126.605	128.72	129.893	129.959
	214	99.3093	103.34	113.74	120.587	126.696	128.915	129.844	130.382
	215	99.0437	103.593	113.786	120.587	126.967	128.963	130.19	131.017
	216	98.9108	103.441	113.969	120.263	127.238	129.109	130.536	131.493
	217	98.4681	103.087	114.29	120.495	127.329	129.158	130.684	131.334
	218	98.8666	102.733	114.656	120.634	127.238	129.352	130.635	130.858
	219	99.265	102.935	115.297	120.958	127.193	129.012	130.635	130.594
	220	99.1765	102.935	114.747	121.282	127.329	129.45	130.585	130.594
	221	99.2208	102.885	114.702	121.653	127.419	129.741	130.635	130.488
	222	99.3093	102.885	114.839	122.116	127.103	130.13	130.585	130.17
	223	99.1765	102.53	114.885	122.116	126.967	130.325	130.338	130.117
	224	99.265	102.885	115.434	122.394	126.786	130.276	130.437	130.065
	225	99.2208	103.391	115.525	122.209	127.283	130.082	130.437	130.223
	226	99.1322	103.391	115.114	122.116	127.464	130.082	130.684	130.435
	227	99.0879	103.492	115.297	122.255	127.464	129.79	130.981	130.329
	228	98.8666	103.846	115.297	122.348	127.6	129.352	130.832	129.959
	229	99.2208	103.593	115.48	122.394	127.69	129.45	130.684	129.906
	230	98.9994	103.947	115.937	122.394	127.826	129.45	130.486	129.853
	231	99.3536	103.947	115.937	122.209	128.369	129.352	130.338	130.329
	232	99.6635	103.188	116.166	122.255	128.504	129.401	130.536	130.276
	233	99.6635	102.885	116.441	122.441	128.278	129.498	130.536	130.594
	234	99.4421	102.885	116.349	122.626	128.188	129.547	130.783	130.276
	235	99.3979	102.986	116.716	123.228	127.69	129.984	131.277	130.17
	236	98.7337	103.846	116.532	123.321	127.51	130.422	130.931	130.276
	237	98.4238	104.251	116.624	123.135	128.052	130.228	130.931	130.488
	238	98.2467	104.15	117.127	122.95	127.871	130.033	130.684	130.117
	239	98.3353	103.998	117.219	122.441	127.69	130.033	130.19	129.747
	240	98.6894	103.593	116.853	122.255	128.007	129.741	130.486	129.536
	241	98.8223	103.593	117.036	122.487	127.6	129.304	131.228	129.747
	242	98.8666	104.302	116.853	122.811	127.871	129.255	131.178	130.223
	243	98.6894	104.352	117.127	123.043	128.143	128.915	131.524	130.488
	244	98.5123	104.504	117.311	123.691	127.962	128.915	131.524	130.276
	245	98.5123	104.757	117.265	123.784	127.826	129.109	131.03	129.747
	246	98.4238	104.352	116.99	123.923	128.143	129.206	130.387	129.536
	247	98.291	104.403	117.311	124.062	128.007	129.255	130.289	129.589
	248	98.4681	104.504	117.402	123.784	128.143	129.887	129.992	130.012
	249	98.8223	104.15	117.494	123.413	128.143	129.79	130.635	130.329
	250	99.0879	103.897	117.631	123.784	128.459	129.79	130.882	130.17
	251	98.9108	104.453	117.951	123.969	128.143	129.644	130.931	129.853
	252	98.6452	104.605	117.86	124.293	128.097	129.547	130.783	129.8
	253	98.6452	104.96	118.501	124.433	128.007	129.352	130.882	129.906
	254	98.5566	105.061	118.592	124.108	127.69	129.45	130.733	130.435
	255	98.6452	104.909	118.363	123.83	128.052	129.304	130.832	130.646
	256	99.265	104.504	118.592	123.969	128.504	128.963	130.733	130.488
	257	98.9551	104.352	118.684	124.108	128.775	129.158	130.783	130.065
	258	99.1322	104.504	118.729	124.525	128.956	129.206	130.882	129.43
	259	99.1322	104.656	118.958	124.71	128.821	129.109	130.733	129.377
	260	99.1322	104.453	119.141	124.479	128.414	129.45	131.228	129.536
	261	98.8223	104.403	119.096	124.293	128.369	129.693	131.327	129.906
	262	99.2208	104.352	119.187	124.664	128.459	129.401	131.425	130.117
	263	98.7337	104.099	119.324	125.035	128.549	129.741	131.524	130.276
	264	98.4681	104.808	119.324	125.266	128.459	129.45	131.228	130.223
	265	98.1582	104.96	118.912	125.22	128.097	129.06	130.684	130.223
	266	98.1582	104.757	119.05	125.359	127.871	129.401	130.832	129.906
	267	98.3795	104.96	119.004	125.266	127.826	129.79	130.585	129.694
	268	99.0879	104.96	119.187	125.683	128.504	129.79	130.536	129.589
	269	99.1765	104.808	119.874	125.637	128.775	129.693	130.635	129.43
	270	98.7337	104.96	119.919	125.452	129.047	129.45	130.338	129.377
	271	98.7337	104.707	119.691	125.081	128.956	128.672	130.14	129.43
	272	98.5566	104.605	119.828	125.081	128.956	128.428	129.943	129.271
	273	98.7337	104.504	120.057	124.803	128.685	128.817	129.547	128.901
	274	99.0879	104.858	120.103	124.664	129.092	129.109	130.042	129.271
	275	99.2208	105.111	120.011	124.664	128.911	129.06	130.19	129.271
	276	99.0437	105.415	119.874	125.081	128.956	129.352	130.14	129.43
	277	99.3979	105.516	119.462	125.359	128.775	129.401	130.437	130.012
	278	99.265	105.719	119.324	125.591	128.866	129.206	130.289	130.223
	279	99.0879	105.567	119.736	125.637	128.775	129.109	130.042	130.488
	280	99.0879	105.87	119.782	125.359	128.911	129.352	130.437	130.646
	281	98.5566	105.567	119.37	125.452	128.956	129.352	130.684	130.223
	282	98.778	105.364	119.462	125.822	129.273	129.741	130.684	129.589
	283	98.8666	105.213	119.553	126.008	129.363	130.179	130.536	129.589
	284	98.6009	105.314	119.736	126.008	129.454	130.13	130.19	129.324
	285	98.778	105.213	120.331	126.471	129.725	129.79	130.042	129.641
	286	98.6894	105.567	120.698	126.61	129.409	129.595	130.042	129.589
	287	98.2024	105.263	120.881	126.517	129.228	129.401	130.536	129.8
	288	98.6452	105.263	121.109	126.332	129.137	129.06	130.437	129.43
	289	98.6452	105.415	121.476	126.471	128.821	128.817	130.289	129.641
	290	98.778	105.263	121.247	126.147	128.549	128.915	130.091	129.43
	291	98.9108	104.858	121.064	126.656	128.64	128.915	130.042	129.694
	292	98.8666	105.516	120.743	126.795	128.64	129.255	129.646	129.694
	293	98.5566	105.567	120.606	126.332	128.775	129.595	129.696	129.906
	294	98.6452	106.124	120.423	125.915	129.183	129.741	129.547	129.853
	295	98.8223	106.376	120.789	125.776	129.183	129.839	129.992	129.853
	296	98.9108	105.972	120.743	125.683	128.911	129.693	129.943	129.589
	297	98.9108	105.263	120.789	126.054	128.73	129.304	130.042	129.747
	298	99.0437	105.567	120.652	126.147	128.64	129.255	129.893	129.959
	299	98.7337	105.82	120.835	126.1	128.278	128.915	130.091	130.276
	300	98.778	105.921	120.926	126.1	128.549	128.915	130.14	130.382
	301	98.778	106.022	121.476	126.054	128.821	129.158	129.992	129.8
	302	98.778	105.668	121.43	126.703	128.685	128.866	130.042	129.43
	303	98.778	105.516	121.293	127.027	128.685	128.817	129.943	129.165
	304	98.4238	105.87	121.064	127.027	128.73	128.866	129.597	129.43
	305	98.2024	106.326	121.476	126.888	128.504	128.672	129.745	129.8
	306	97.9368	105.972	121.888	126.378	128.685	128.526	129.696	129.906
	307	97.7597	106.073	121.979	126.286	129.137	128.817	129.597	129.853
	308	97.9368	105.516	121.933	126.703	129.228	128.963	130.536	130.012
	309	98.4681	105.82	122.025	126.841	129.183	129.255	130.882	129.694
	310	98.8666	106.022	121.75	126.703	129.137	129.158	131.03	129.589
	311	99.3979	106.022	121.567	126.61	128.911	128.866	130.882	129.324
	312	99.3979	106.022	122.025	126.378	128.821	128.672	130.635	129.589
	313	99.1322	106.731	122.116	126.286	129.002	128.963	130.19	130.065
	314	98.5566	106.68	122.391	126.193	128.866	128.866	130.289	130.17
	315	98.291	106.781	122.391	126.471	129.002	128.866	130.289	129.8
	316	98.2467	106.68	122.116	126.61	128.821	128.526	130.289	129.589
	317	98.2467	106.478	121.842	126.656	128.549	128.185	129.943	129.536
	318	98.4238	106.174	122.116	126.61	128.685	128.282	130.437	129.959
	319	98.778	106.528	122.254	126.749	128.821	128.623	130.091	130.117
	320	98.8223	106.326	122.254	126.471	129.092	128.672	130.239	129.747
	321	98.778	106.124	122.162	126.564	129.363	129.06	130.437	129.43
	322	98.7337	106.326	122.025	126.332	129.409	129.109	130.239	129.218
	323	98.8666	106.427	122.254	126.471	129.092	128.963	129.893	129.589
	324	98.9551	106.326	122.666	126.841	129.092	129.109	129.844	129.747
	325	98.9551	106.478	122.666	127.073	129.228	128.672	129.498	129.853
	326	98.8666	106.832	122.62	127.305	129.454	128.574	129.646	129.589
	327	98.778	106.63	122.483	127.397	129.544	128.526	129.893	129.589
	328	98.778	106.326	122.574	126.703	129.002	128.72	130.091	129.377
	329	98.9551	106.225	122.757	126.888	128.64	129.012	130.091	129.8
	330	98.8223	106.376	123.306	127.212	128.504	129.45	129.893	129.694
	331	98.2024	106.528	123.215	126.795	129.183	129.401	129.745	129.694
	332	98.7337	107.136	122.986	127.119	129.228	129.158	129.794	129.641
	333	98.778	106.933	122.803	126.841	129.544	128.769	129.943	129.853
	334	99.0879	106.579	123.261	126.424	129.318	128.866	130.042	130.012
	335	99.2208	106.781	123.169	126.749	128.911	129.06	130.239	130.065
	336	98.9551	106.933	123.673	127.073	128.73	129.401	130.289	129.8
	337	98.291	106.781	123.49	127.305	128.595	129.741	129.794	129.377
	338	98.4681	106.933	123.306	127.536	128.369	129.984	129.597	129.483
	339	98.291	106.832	123.261	127.119	128.64	129.547	129.992	129.8
	340	98.3795	106.63	123.49	126.934	128.73	129.109	129.893	130.065
	341	98.7337	106.68	123.49	127.073	129.137	129.012	130.19	129.906
	342	98.9108	106.832	123.718	127.166	129.137	128.817	130.091	130.012
	343	98.8666	106.731	123.49	127.444	128.73	128.672	130.783	129.853
	344	98.5566	107.085	123.444	127.305	128.504	128.672	130.733	129.906
	345	98.291	106.984	123.49	127.119	128.685	128.526	130.733	129.959
	346	98.4681	106.528	123.306	127.119	128.64	128.526	130.289	129.747
	347	98.778	106.478	123.261	127.536	129.454	129.206	129.844	129.43
	348	98.9551	106.579	123.261	127.629	129.544	129.547	129.498	129.06
	349	99.1322	106.781	122.986	127.583	129.68	129.547	130.19	129.113
	350	98.6894	106.781	123.169	127.258	129.363	129.45	130.289	129.483
	351	98.1582	106.478	123.49	126.981	129.454	129.45	130.091	129.694
	352	98.3353	106.174	123.535	127.166	129.047	129.45	129.745	129.641
	353	98.3353	106.427	123.81	127.351	128.866	129.547	129.794	129.589
	354	98.3353	106.68	123.947	127.444	128.685	129.401	129.844	129.377
	355	98.6452	107.085	123.673	127.49	128.821	129.255	129.745	129.43
	356	98.6452	107.136	123.718	127.49	128.911	129.206	129.992	129.8
	357	98.3353	107.085	123.718	127.351	129.092	129.304	130.14	130.065
	358	98.8223	106.984	123.718	127.397	128.866	129.741	129.794	129.906
	359	98.5566	107.136	124.313	127.305	128.549	129.79	130.14	130.012
	360	98.5123	106.984	124.359	127.583	128.595	129.644	130.14	129.853
	361	98.5566	107.237	123.81	127.583	128.459	129.304	129.992	129.43
	362	98.3795	107.591	123.581	127.583	128.956	129.012	129.893	129.43
	363	98.2467	107.743	123.398	127.49	129.318	128.866	129.547	129.43
	364	98.3353	107.844	123.535	127.212	129.635	129.06	129.251	129.113
	365	98.0696	107.895	124.405	127.212	129.409	129.06	129.35	129.218
	366	98.3353	107.996	124.13	127.027	129.544	128.866	129.448	129.165
	367	98.6894	107.996	123.764	126.841	129.047	128.769	129.35	129.165
	368	98.4238	107.895	123.581	127.258	129.092	128.817	129.597	129.589
	369	98.3353	107.642	123.398	127.722	128.956	128.769	129.794	129.8
	370	98.2467	107.743	123.627	127.722	129.047	129.109	129.696	129.8
	371	98.3353	107.642	124.176	127.907	128.866	128.866	130.091	129.589
	372	98.7337	107.692	124.313	127.444	129.092	128.769	130.239	129.853
	373	98.9551	107.439	124.542	127.444	129.499	128.817	130.19	129.641
	374	98.6009	107.389	124.634	128.046	129.68	128.477	130.091	129.324
	375	98.0253	107.439	124.542	128.463	129.861	128.088	130.14	129.165
	376	98.1139	107.895	124.222	128.555	129.815	128.137	129.547	129.06
	377	98.1582	107.793	124.268	128.231	129.092	128.282	129.745	128.795
	378	98.5123	107.338	124.359	127.722	128.775	128.817	129.844	129.165
	379	98.291	107.389	124.588	127.305	128.549	129.206	129.943	129.218
	380	98.0696	107.642	125	126.934	128.956	128.915	129.943	128.954
	381	98.291	107.49	124.863	126.981	129.68	128.282	129.992	128.901
	382	98.9994	107.389	124.725	127.119	130.268	127.748	129.943	128.901
	383	99.5307	107.237	124.634	127.119	130.042	128.234	129.943	129.324
	384	99.4864	107.338	124.496	127.351	129.77	128.623	129.893	129.218
	385	98.8223	107.743	124.451	127.212	128.866	129.012	129.597	129.165
	386	98.1139	108.35	124.496	127.305	128.775	128.866	129.498	129.377
	387	98.2467	108.249	124.222	127.166	128.866	128.866	129.547	129.271
	388	98.2467	108.3	124.176	127.166	129.002	128.282	129.844	128.954
	389	98.4238	108.401	123.856	127.536	128.73	128.672	129.893	129.113
	390	98.1582	108.603	123.764	128.046	128.73	128.623	129.943	128.689
	391	98.1139	108.856	123.718	128.092	128.323	128.477	130.486	128.636
	392	98.0696	109.008	124.085	128.37	128.369	128.282	130.14	129.06
	393	98.3795	108.907	124.588	128	128.775	128.137	129.844	129.06
	394	98.3353	108.907	125.137	128.046	129.002	127.845	129.844	128.742
	395	98.5566	108.755	125.366	128	128.821	128.234	129.893	128.848
	396	98.5566	108.654	125.229	127.814	129.047	128.72	129.893	129.06
	397	98.2467	108.755	124.909	127.49	128.369	128.817	130.585	129.007
	398	98.4238	108.957	124.725	127.258	128.233	128.866	130.486	129.165
	399	98.4681	109.059	124.771	127.073	128.414	128.477	130.239	128.636
	400	98.2024	109.059	124.68	127.351	128.64	128.185	130.042	128.055
	401	98.3795	108.755	124.817	127.629	128.64	128.137	130.14	128.319
	402	98.4238	108.3	124.817	127.814	129.544	128.672	129.992	129.007
	403	97.981	107.591	124.909	128.046	129.454	128.817	130.536	129.324
	404	98.291	107.793	125.091	128.231	129.589	128.866	130.832	129.641
	405	98.1582	107.793	125.137	128.139	129.318	128.817	130.338	128.954
	406	97.981	108.047	124.634	128.092	129.002	128.574	130.14	128.689
	407	98.2024	108.148	125.046	128	128.595	128.38	129.498	128.901
	408	98.3353	108.198	124.817	128.185	128.73	128.574	129.152	129.43
	409	98.1582	108.3	124.817	127.953	128.685	128.574	129.251	129.8
	410	98.1582	108.755	124.68	128.046	128.866	128.526	129.3	129.641
	411	98.1139	109.008	124.268	128.231	128.459	128.526	129.201
	412	97.8925	108.806	124.085	128.139	128.64	128.623	129.893
	413	97.9368
	414	97.981
	415	97.9368
	416	98.0696
	417	98.1582
	418	98.0253
		98.0696
		98.291
		98.4681
		98.291
		97.5826

## Sheet: Figure 5C
		0.25 μM				0.5 μM				1 μM				10 μM				50 μM				100 μM				200 μM
		0.068513	0.046324	0.004011		0.08357	0.076054	0.064584		0.150298	0.098979	0.095292		0.307352	0.357429	0.444236		0.417645	0.450615	0.547491		0.800046	0.729998	0.821732		0.981641	0.876	0.949277

## Sheet: Figure 5D
	Time(s)	041216-Ca-Fura2
	0	137.691
	2.6	130.435
	5.2	134.581
	7.8	124.193
	10.4	136.231
	13	131.926
	15.6	128.892
	18.2	136.658
	20.8	128.125
	23.4	126.228
	26	129.811
	28.6	136.646
	31.2	138.603
	33.8	130.999
	36.4	138.066
	39	132.917
	41.6	133.045
	44.2	136.923
	46.8	133.109
	49.4	126.424
	52	136.31
	54.6	137.372
	57.2	125.772
	59.8	134.566
	62.4	145.618
	65	126.416
	67.6	130.103
	70.2	131.264
	72.8	138.364
	75.4	131.977
	78	135.186
	80.6	128.628
	83.2	135.432
	85.8	137.806
	88.4	134.079
	91	132.283
	93.6	124.463
	96.2	126.964
	98.8	125.62
	101.4	126.026
	104	142.014
	106.6	130.346
	109.2	140.186
	111.8	125.595
	114.4	128.069
	117	127.093
	119.6	134.347
	122.2	127.026
	124.8	133.72
	127.4	132.857
	130	133.87
	132.6	138.172
	135.2	126.567
	137.8	137.825
	140.4	136.315
	143	140.57
	145.6	135.606
	148.2	129.036
	150.8	136.582
	153.4	139.019
	156	127.656
	158.6	131.622
	161.2	137.076
	163.8	137.063
	166.4	132.748
	169	131.749
	171.6	134.124
	174.2	133.375
	176.8	139.66
	179.4	129.847
	182	136.247
	184.6	137.043
	187.2	131.906
	189.8	133.475
	192.4	132.283
	195	132.799
	197.6	132.805
	200.2	131.586
	202.8	132.667
	205.4	143.316
	208	131.663
	210.6	136.197
	213.2	140.884
	215.8	134.534
	218.4	127.993
	221	137.173
	223.6	131.042
	226.2	139.801
	228.8	134.443
	231.4	134.053
	234	130.628
	236.6	131.267
	239.2	138.304
	241.8	132.246
	244.4	143.226
	247	132.269
	249.6	144.055
	252.2	134.48
	254.8	142.779
	257.4	136.797
	260	137.387
	262.6	143.151
	265.2	137.02
	267.8	136.251
	270.4	131.485
	273	143.633
	275.6	136.921
	278.2	140.103
	280.8	132.795
	283.4	133.777
	286	134.189
	288.6	132.648
	291.2	135.935
	293.8	146.923
	296.4	130.497
	299	137.144
	301.6	136.885
	304.2	138.643
	306.8	150.958
	309.4	135.857
	312	135.344
	314.6	137.339
	317.2	133.327
	319.8	137.103
	322.4	141.501
	325	139.723
	327.6	140.272
	330.2	142.659
	332.8	139.511
	335.4	135.338
	338	142.15
	340.6	136.62
	343.2	132.344
	345.8	133.276
	348.4	144.414
	351	132.913
	353.6	140.021
	356.2	137.216
	358.8	131.227
	361.4	132.159
	364	137.462
	366.6	139.285
	369.2	138.262
	371.8	144.809
	374.4	143.963
	377	145.295
	379.6	138.322
	382.2	135.42
	384.8	139.95
	387.4	134.933
	390	139.742
	392.6	142.863
	395.2	137.745
	397.8	135.972
	400.4	145.494
	403	78.869*
	405.6	242.41
	408.2	233.221
	410.8	236.617
	413.4	228.107
	416	221.983
	418.6	238.431
	421.2	220.349
	423.8	219.208
	426.4	219.201
	429	223.893
	431.6	217.715
	434.2	209.601
	436.8	223.772
	439.4	221.262
	442	220.564
	444.6	213.867
	447.2	232.946
	449.8	218.984
	452.4	223.965
	455	220.92
	457.6	218.603
	460.2	227.16
	462.8	217.204
	465.4	227.157
	468	235.868
	470.6	240.537
	473.2	243.187
	475.8	223.664
	478.4	223.016
	481	214.034
	483.6	223.051
	486.2	237.126
	488.8	229.426
	491.4	235.585
	494	230.079
	496.6	233.982
	499.2	239.466
	501.8	237.902
	504.4	241.39
	507	245.506
	509.6	233.558
	512.2	245.96
	514.8	243.302
	517.4	240.081
	520	238.795
	522.6	245.984
	525.2	252.881
	527.8	245.027
	530.4	256.552
	533	256.183
	535.6	226.441
	538.2	248.427
	540.8	235.121
	543.4	248.297
	546	251.5
	548.6	242.698
	551.2	242.426
	553.8	276.811
	556.4	259.109
	559	265.721
	561.6	249.685
	564.2	251.076
	566.8	256.256
	569.4	261.059
	572	263.268
	574.6	256.512
	577.2	261.443
	579.8	271.035
	582.4	272.457
	585	281.306
	587.6	276.88
	590.2	274.9
	592.8	263.739
	595.4	277.394
	598	271.785
	600.6	275.617
		266.333
		278.265
		281.42
		282.647
		279.336
		265.501
		284.151
		280.447
		267.457
		271.769
		275.93
		265.379
		276.103
		274.238
		293.428
		299.013
		284.626

## Sheet: Figure 5E
	Time(s)	040716-Ca-GCAMP6-MITO
	0.8	70.4388
	3.6	71.3064
	6.4	71.149
	9.2	71.6833
	12	71.36
	14.8	70.4053
	17.6	70.5979
	20.4	70.4254
	23.2	71.1322
	26	71.6917
	28.8	71.7403
	31.6	71.7754
	34.4	71.5828
	37.2	70.8056
	40	71.0284
	42.8	71.1908
	45.6	71.283
	48.4	71.8273
	51.2	71.6113
	54	70.8424
	56.8	70.6029
	59.6	70.6699
	62.4	70.5811
	65.2	70.9346
	68	71.0066
	70.8	71.0301
	73.6	71.4052
	76.4	71.767
	79.2	71.5309
	82	70.7436
	84.8	70.0535
	87.6	69.618
	90.4	69.9028
	93.2	70.7034
	96	71.0166
	98.8	70.8743
	101.6	70.7621
	104.4	70.6599
	107.2	70.556
	110	70.6934
	112.8	70.8525
	115.6	71.0267
	118.4	70.9111
	121.2	70.9128
	124	70.7604
	126.8	71.0703
	129.6	71.417
	132.4	71.6833
	135.2	71.4806
	138	70.9111
	140.8	70.4287
	143.6	70.2847
	146.4	69.881
	149.2	70.0854
	152	70.3735
	154.8	70.1507
	157.6	70.7185
	160.4	70.5343
	163.2	71.0954
	166	71.1808
	168.8	70.9212
	171.6	71.1322
	174.4	70.3735
	177.2	70.1758
	180	69.9279
	182.8	69.9781
	185.6	69.7168
	188.4	69.8391
	191.2	70.5192
	194	70.4773
	196.8	70.608
	199.6	70.5862
	202.4	70.5879
	205.2	71.0518
	208	71.1188
	210.8	71.7335
	213.6	71.6615
	216.4	71.1724
	219.2	71.1674
	222	70.6281
	224.8	70.7905
	227.6	70.5493
	230.4	70.886
	233.2	70.9831
	236	70.5208
	238.8	70.4723
	241.6	70.546
	244.4	70.6783
	247.2	70.8609
	250	70.2863
	252.8	69.9865
	255.6	69.2981
	258.4	69.3266
	261.2	70.0418
	264	70.2378
	266.8	70.7788
	269.6	71.0401
	272.4	70.7956
	275.2	70.5477
	278	70.6833
	280.8	70.1825
	283.6	70.6398
	286.4	70.5778
	289.2	70.3299
	292	70.3852
	294.8	70.3182
	297.6	71.0384
	300.4	71.1641
	303.2	71.2964
	306	71.4622
	308.8	71.3248
	311.6	71.9597
	314.4	71.3131
	317.2	71.0367
	320	70.7168
	322.8	70.0301
	325.6	70.5376
	328.4	70.2411
	331.2	70.6364
	334	71.2076
	336.8	71.3232
	339.6	71.7419
	342.4	71.1741
	345.2	70.3014
	348	69.7855
	350.8	69.3467
	353.6	69.551
	356.4	70.556
	359.2	70.5744
	362	70.5912
	364.8	70.2277
	367.6	69.1172
	370.4	69.824
	373.2	69.8207
	376	69.8978
	378.8	69.6448
	381.6	69.1792
	384.4	69.201
	387.2	69.3081
	390	69.6214
	392.8	69.6482
	395.6	70.6755
	398.4	71.1869
	401.2	71.4304
	404	71.0502
	406.8	70.5208
	409.6	70.6515
	412.4	70.6649
	415.2	71.2277
	418	71.5711
	420.8	71.2244
	423.6	72.0334
	426.4	72.2411
	429.2	71.5426
	432	71.3969
	434.8	71.092
	437.6	70.546
	440.4	70.6883
	443.2	70.6063
	446	71.159
	448.8	71.3986
	451.6	71.7436
	454.4	72.082
	457.2	71.7922
	460	71.6196
	462.8	71.5242
	465.6	71.4622
	468.4	71.0954
	471.2	71.0116
	474	70.6548
	476.8	71.3835
	479.6	71.216
	482.4	71.4287
	485.2	71.7587
	488	71.0769
	490.8	71.4605
	493.6	71.3332
	496.4	71.5041
	499.2	71.7151
	502	71.3851
	504.8	71.618
	507.6	71.7168
	510.4	71.6649
	513.2	71.4873
	516	71.5259
	518.8	71.8173
	521.6	71.02
	524.4	71.7553
	527.2	71.7285
	530	71.6213
	532.8	72.2126
	535.6	71.8089
	538.4	72.2629
	541.2	72.0334
	544	72.4973
	546.8	72.7386
	549.6	71.7771
	552.4	72.1138
	555.2	71.6012
	558	70.9647
	560.8	71.6213
	563.6	71.4404
	566.4	71.7604
	569.2	71.8006
	572	71.8474
	574.8	71.6565
	577.6	71.1121
	580.4	71.7034
	583.2	71.4706
	586	71.2344
	588.8	72.097
	591.6	71.6448
	594.4	71.7486
	597.2	71.9882
	600	71.628
	559.7	72.1423
	562.3	71.8424
	564.9	71.1908
	567.5	71.5326
	570.1	71.7536
	572.7	71.767
	575.3	72.5459
	577.9	72.1439
	580.5	72.1522
	583.1	72.1091
	585.7	72.0743
	588.3	71.6394
	590.9	71.3569
	593.5	71.187
	596.1	71.0877
	598.7	71.0953
	601.3
	603.9
	606.5
	609.1
	611.7
	614.3
	616.9
	619.5
	622.1
	624.7
	627.3
	629.9
	632.5
	635.1
	637.7

## Sheet: Figure 5F
	Time(s)	TG+Ca
	0	139.136
	2.6	141.799
	5.2	144.041
	7.8	133.55
	10.4	144.79
	13	132.805
	15.6	136.218
	18.2	137.36
	20.8	139.659
	23.4	138.894
	26	150.838
	28.6	130.104
	31.2	142.585
	33.8	145.064
	36.4	149.886
	39	142.254
	41.6	136.929
	44.2	146.482
	46.8	144.062
	49.4	143.683
	52	139.067
	54.6	144.668
	57.2	143.572
	59.8	143.707
	62.4	157.05
	65	142.682
	67.6	139.924
	70.2	149.607
	72.8	126.482
	75.4	137.595
	78	130.17
	80.6	141.215
	83.2	150.56
	85.8	140.014
	88.4	142.958
	91	135.733
	93.6	146.114
	96.2	138.974
	98.8	142.005
	101.4	143.288
	104	172.764
	106.6	150.52
	109.2	142.943
	111.8	149.686
	114.4	166.8
	117	185.564
	119.6	186.292
	122.2	177.594
	124.8	196.185
	127.4	208.493
	130	210.651
	132.6	206.812
	135.2	211.752
	137.8	227.241
	140.4	216.427
	143	239.631
	145.6	233.56
	148.2	234.171
	150.8	222.491
	153.4	220.415
	156	238.18
	158.6	222.009
	161.2	242.694
	163.8	243.169
	166.4	232.475
	169	245.912
	171.6	234.796
	174.2	212.773
	176.8	244.636
	179.4	220.12
	182	240.588
	184.6	221.469
	187.2	244.07
	189.8	201.552
	192.4	228.28
	195	207.186
	197.6	218.348
	200.2	222.543
	202.8	210.771
	205.4	225.829
	208	206.623
	210.6	203.041
	213.2	198.475
	215.8	215.708
	218.4	200.653
	221	194.473
	223.6	198.386
	226.2	218.988
	228.8	185.51
	231.4	190.375
	234	177.838
	236.6	186.59
	239.2	190.573
	241.8	192.022
	244.4	191.519
	247	181.333
	249.6	193.603
	252.2	191.798
	254.8	178.5
	257.4	179.597
	260	170.31
	262.6	196.239
	265.2	169.806
	267.8	177.333
	270.4	176.697
	273	161.25
	275.6	160.635
	278.2	175.859
	280.8	166.114
	283.4	164.24
	286	159.302
	288.6	154.463
	291.2	155.337
	293.8	154.879
	296.4	147.28
	299	165.122
	301.6	155.351
	304.2	157.911
	306.8	141.724
	309.4	148.126
	312	144.26
	314.6	157.895
	317.2	146.375
	319.8	151.213
	322.4	146.609
	325	146.839
	327.6	133.168
	330.2	148.759
	332.8	146.578
	335.4	136.199
	338	140.806
	340.6	147.37
	343.2	136.635
	345.8	141.775
	348.4	141.648
	351	142.157
	353.6	134.181
	356.2	144.925
	358.8	143.918
	361.4	145.629
	364	141.552
	366.6	140.175
	369.2	126.506
	371.8	138.258
	374.4	136.306
	377	128.013
	379.6	130.977
	382.2	141.002
	384.8	133.521
	387.4	145.328
	390	140.823
	392.6	136.652
	395.2	148.247
	397.8	123.449
	400.4	50.681*
	403	276.267
	405.6	292.557
	408.2	264.232
	410.8	279.041
	413.4	276.064
	416	297.109
	418.6	305.611
	421.2	276.544
	423.8	278.611
	426.4	283.039
	429	299.057
	431.6	302.657
	434.2	284.732
	436.8	305.145
	439.4	307.276
	442	304.876
	444.6	283.349
	447.2	316.803
	449.8	303.801
	452.4	319.069
	455	323.758
	457.6	281.757
	460.2	320.684
	462.8	312.618
	465.4	286.927
	468	323.962
	470.6	361.739
	473.2	355.834
	475.8	296.913
	478.4	322.263
	481	339.245
	483.6	313.071
	486.2	344.25
	488.8	346.608
	491.4	328.315
	494	354.352
	496.6	325.98
	499.2	308.866
	501.8	348.156
	504.4	331.432
	507	342.794
	509.6	354.855
	512.2	353.189
	514.8	355.219
	517.4	348.607
	520	369.545
	522.6	380.468
	525.2	337.794
	527.8	341.989
	530.4	333.412
	533	330.125
	535.6	329.813
	538.2	333.908
	540.8	327.27
	543.4	322.616
	546	349.223
	548.6	329.992
	551.2	365.822
	553.8	394.03
	556.4	390.78
	559	358.814
	561.6	341.082
	564.2	373.261
	566.8	371.565
	569.4	326.455
	572	401.09
	574.6	376.398
	577.2	355.093
	579.8	358.002
	582.4	342.754
	585	394.877
	587.6	324.877
	590.2	357.953
	592.8	376.307
	595.4	363.543
	598	396.752
	600.6	372.807
	603.2	392.752
	605.8	350.019
	608.4	372.844
	611	344.611
	613.6	332.872
	616.2	388.375
	618.8	364.045
	621.4	382.355
	624	376.929
	626.6
	629.2
	631.8
	634.4
	637
	0
	2.8
	5.6
	8.4
	11.2
	14
	16.8
	19.6
	22.4
	25.2
	28
	30.8
	33.6
	36.4
	39.2
	42
	44.8
	47.6
	50.4
	53.2
	56
	58.8
	61.6
	64.4
	67.2
	70
	72.8
	75.6
	78.4
	81.2
	84
	86.8
	89.6
	92.4
	95.2
	98
	100.8
	103.6
	106.4
	109.2
	112
	114.8
	117.6
	120.4
	123.2
	126
	128.8
	131.6
	134.4
	137.2
	140
	142.8
	145.6
	148.4
	151.2
	154
	156.8
	159.6
	162.4
	165.2
	168
	170.8
	173.6
	176.4
	179.2
	182
	184.8
	187.6
	190.4
	193.2
	196
	198.8
	201.6
	204.4
	207.2
	210
	212.8
	215.6
	218.4
	221.2
	224
	226.8
	229.6
	232.4
	235.2
	238
	240.8
	243.6
	246.4
	249.2
	252
	254.8
	257.6
	260.4
	263.2
	266
	268.8
	271.6
	274.4
	277.2
	280
	282.8
	285.6
	288.4
	291.2
	294
	296.8
	299.6
	302.4
	305.2
	308
	310.8
	313.6
	316.4
	319.2
	322
	324.8
	327.6
	330.4
	333.2
	336
	338.8
	341.6
	344.4
	347.2
	350
	352.8
	355.6
	358.4
	361.2
	364
	366.8
	369.6
	372.4
	375.2
	378
	380.8
	383.6
	386.4
	389.2
	392
	394.8
	397.6
	400.4
	403.2
	406
	408.8
	411.6
	414.4
	417.2
	420
	422.8
	425.6
	428.4
	431.2
	434
	436.8
	439.6
	442.4
	445.2
	448
	450.8
	453.6
	456.4
	459.2
	462
	464.8
	467.6
	470.4
	473.2
	476
	478.8
	481.6
	484.4
	487.2
	490
	492.8
	495.6
	498.4
	501.2
	504
	506.8
	509.6
	512.4
	515.2
	518
	520.8
	523.6
	526.4
	529.2
	532
	534.8
	537.6
	540.4
	543.2
	546
	548.8
	551.6
	554.4
	557.2
	560
	562.8
	565.6
	568.4
	571.2
	574
	576.8
	579.6
	582.4
	585.2
	588
	590.8
	593.6
	596.4
	599.2
	602

## Sheet: Figure 5G
	Time(s)
	0.7		67.8957
	3.3		67.9527
	5.9		67.8159
	8.5		67.9299
	11.1		67.5879
	13.7		67.8501
	16.3		68.2946
	18.9		68.3402
	21.5		68.0439
	24.1		67.9071
	26.7		67.531
	29.3		67.5652
	31.9		67.9185
	34.5		67.7019
	37.1		67.5652
	39.7		67.9185
	42.3		67.8501
	44.9		67.9527
	47.5		67.8843
	50.1		67.1434
	52.7		66.8813
	55.3		66.8585
	57.9		66.8813
	60.5		66.8129
	63.1		67.0636
	65.7		67.4626
	68.3		67.4626
	70.9		67.1206
	73.5		66.7787
	76.1		66.186
	78.7		66.4482
	81.3		67.3144
	83.9		67.7589
	86.5		67.9527
	89.1		67.6677
	91.7		66.6989
	94.3		66.7331
	96.9		67.1434
	99.5		67.6107
	102.1		69.2406
	104.7		72.6257
	107.3		74.7571
	109.9		75.76
	112.5		77.6748
	115.1		78.8032
	117.7		80.0341
	120.3		80.4103
	122.9		81.3791
	125.5		81.5614
	128.1		81.9489
	130.7		82.1769
	133.3		82.439
	135.9		83.2825
	138.5		83.2483
	141.1		83.1001
	143.7		82.9292
	146.3		83.2483
	148.9		82.8608
	151.5		82.3251
	154.1		82.0059
	156.7		82.0059
	159.3		81.2537
	161.9		80.7978
	164.5		80.9802
	167.1		79.8746
	169.7		79.4415
	172.3		79.2591
	174.9		79.2021
	177.5		78.4157
	180.1		78.051
	182.7		77.8458
	185.3		76.7516
	187.9		76.1248
	190.5		76.2957
	193.1		75.099
	195.7		74.7571
	198.3		74.3239
	200.9		74.1986
	203.5		73.2184
	206.1		72.7511
	208.7		72.5687
	211.3		72.1128
	213.9		70.5627
	216.5		71.1896
	219.1		70.027
	221.7		69.48
	224.3		70.1866
	226.9		69.7877
	229.5		69.0012
	232.1		68.5795
	234.7		68.1464
	237.3		68.363
	239.9		68.2148
	242.5		67.9641
	245.1		67.4512
	247.7		66.7217
	250.3		66.7787
	252.9		67.2004
	255.5		67.3486
	258.1		67.189
	260.7		67.2004
	263.3		66.8813
	265.9		66.5508
	268.5		66.5622
	271.1		66.528
	273.7		66.1746
	276.3		66.3
	278.9		66.2772
	281.5		66.0834
	284.1		65.8213
	286.7		65.525
	289.3		65.2286
	291.9		65.1944
	294.5		65.1603
	297.1		65.0919
	299.7		65.0121
	302.3		64.6816
	304.9		64.6587
	307.5		65.0235
	310.1		65.3882
	312.7		65.3996
	315.3		64.7841
	317.9		64.294
	320.5		64.2712
	323.1		64.6359
	325.7		65.0577
	328.3		65.2856
	330.9		64.9779
	333.5		64.8297
	336.1		64.7613
	338.7		64.9209
	341.3		64.6474
	343.9		64.4194
	346.5		64.2256
	349.1		63.7469
	351.7		63.7811
	354.3		64.0661
	356.9		64.2712
	359.5		64.4422
	362.1		64.4308
	364.7		64.3624
	367.3		64.6929
	369.9		64.7271
	372.5		64.5562
	375.1		64.4194
	377.7		64.2826
	380.3		63.9407
	382.9		63.9521
	385.5		63.7811
	388.1		63.1315
	390.7		63.1429
	393.3		63.633
	395.9		63.8609
	398.5		64.2028
	401.1		64.5676
	403.7		63.9065
	406.3		64.0889
	408.9		64.9095
	411.5		65.5022
	414.1		66.1176
	416.7		66.1974
	419.3		65.6959
	421.9		66.0834
	424.5		65.9809
	427.1		65.7301
	429.7		65.8213
	432.3		65.2856
	434.9		65.3084
	437.5		65.5478
	440.1		65.1375
	442.7		65.1944
	445.3		65.3882
	447.9		65.2856
	450.5		65.354
	453.1		65.1147
	455.7		65.0349
	458.3		65.1147
	460.9		65.2628
	463.5		65.4794
	466.1		65.6731
	468.7		65.7985
	471.3		65.8441
	473.9		65.7073
	476.5		65.9581
	479.1		66.1632
	481.7		66.3
	484.3		65.9809
	486.9		65.5706
	489.5		65.3768
	492.1		65.7187
	494.7		66.1518
	497.3		66.243
	499.9		65.8099
	502.5		66.0493
	505.1		66.0607
	507.7		66.2886
	510.3		66.5166
	512.9		65.8897
	515.5		66.0721
	518.1		66.4938
	520.7		66.7445
	523.3		67.0751
	525.9		66.6419
	528.5		65.9581
	531.1		65.9239
	533.7		66.0834
	536.3		66.414
	538.9		67.0295
	541.5		66.9269
	544.1		66.7331
	546.7		66.4254
	549.3		66.8015
	551.9		66.6989
	554.5		66.8585
	557.1		66.7901
	559.7		66.4482
	562.3		66.2544
	564.9		66.5508
	567.5		66.3456
	570.1		66.3
	572.7		66.186
	575.3		66.0379
	577.9		66.3342
	580.5		66.5166
	583.1		66.5735
	585.7		66.585
	588.3		66.5052
	590.9		66.0834
	593.5		66.3
	596.1		65.9353
	598.7		65.8441
	601.3		65.7643
	603.9		65.9923
	606.5		66.1974
	609.1		66.6077
	611.7		66.5735
	614.3		66.2202
	616.9		65.7301
	619.5		66.0493
	622.1		65.9011
	624.7		66.2886
	627.3		66.357
	629.9		66.1063
	632.5		66.186
	635.1		66.5394
	637.7		65.9923
			66.2544
			66.1746
			66.1974
			66.3342
			66.2316
			66.2544
			66.1518
			66.0721
			65.9467

## Sheet: Figure 5H
	Time(s)	+ ATc	- ATc
	0	100.78	99.5318				+ ATc				- ATc
	1	100.943	99.5015				0.877139	2.95151	0.095809	0.968694	13.7238	11.7888	15.0037
	2	100.139	98.7083
	3	99.8243	98.594
	4	99.0759	98.5216
	5	99.3611	98.7875
	6	100.191	99.4756
	7	100.799	99.6168
	8	100.05	98.8581
	9	99.9575	98.7359
	10	99.9093	98.816
	11	100.45	99.1461
	12	101.447	99.9236
	13	101.754	99.1188
	14	101.462	99.2297
	15	101.169	99.6456
	16	101.121	99.9366
	17	100.472	99.5206
	18	99.8238	98.7441
	19	99.5866	99.0213
	20	100.194	99.4372
	21	100.713	99.7837
	22	100.865	100.186
	23	100.272	100.005
	24	99.7347	98.9655
	25	99.2308	99.617
	26	99.9717	99.2426
	27	100.068	99.3673
	28	99.7197	99.3672
	29	99.5159	98.8819
	30	99.1899	98.9234
	31	98.8193	98.9095
	32	100.005	98.8956
	33	101.201	99.5471
	34	101.365	99.8105
	35	101.072	100.309
	36	100.123	101.308
	37	99.3082	100.795
	38	99.0932	100.892
	39	99.5341	100.323
	40	99.8749	99.5605
	41	99.949	99.2137
	42	100.479	99.075
	43	100.686	99.1443
	44	100.605	99.8374
	45	100.59	100.337
	46	100.853	100.433
	47	100.393	100.572
	48	99.8117	100.406
	49	99.2188	100.045
	50	99.2373	99.5597
	51	99.4337	99.213
	52	99.341	99.7398
	53	99.4929	100.419
	54	98.989	100.655
	55	98.9741	100.294
	56	99.4483	100.197
	57	99.3112	99.2264
	58	99.1518	99.6561
	59	99.7039	100.1
	60	99.9557	100.127
	61	100.585	100.308
	62	100.882	100.585
	63	99.4888	99.5448
	64	99.474	99.6279
	65	99.9037	99.919
	66	100.245	99.5862
	67	100.296	99.7109
	68	100.293	99.5722
	69	99.5109	98.8789
	70	99.7739	99.2947
	71	100.626	99.6135
	72	100.589	99.8491
	73	100.496	100.029
	74	100.381	100.154
	75	99.9664	99.9321
	76	99.9182	100.168
	77	99.97	100.389
	78	99.9663	100.417
	79	100.207	100.278
	80	99.9477	99.8485
	81	99.5771	99.2384
	82	99.6067	98.9611
	83	99.703	99.3214
	84	99.7549	99.8621
	85	99.4844	100.236
	86	99.2917	100.264
	87	99.5547	99.9866
	88	100.14	99.7231
	89	100.381	100.07
	90	99.9103	100.43
	91	99.6509	100.194
	92	99.7583	100.083
	93	100.121	100.236
	94	100.451	99.9445
	95	99.6693	99.7365
	96	99.9768	99.6948
	97	100.229	99.7224
	98	100.525	99.4173
	99	100.444	100.069
	100	100.295	100.873
	101	99.1893	104.596
	102	99.4664	108.041
	103	99.5677	111.333
	104	99.4448	113.489
	105	99.2508	113.895
	106	99.0643	113.265
	107	99.0123	111.447
	108	98.9604	111.252
	109	98.9235	111.09
	110	98.8828	111.105
	111	98.9617	110.934
	112	99.1079	110.818
	113	99.4037	110.544
	114	99.5985	110.391
	115	99.8756	110.281
	116	100.213	110.389
	117	100.43	110.395
	118	100.269	110.741
	119	99.7576	110.98
	120	99.1263	111.219
	121	98.6967	110.847
	122	98.7682	110.322
	123	99.2397	109.702
	124	99.9467	109.638
	125	100.478	109.793
	126	100.74	110.181
	127	100.598	110.206
	128	100.229	110.249
	129	99.7506	110.311
	130	99.7361	110.424
	131	99.9907	110.127
	132	100.529	109.68
	133	100.706	109.364
	134	100.572	109.407
	135	100.093	109.493
	136	99.6826	109.47
	137	99.3839	109.294
	138	99.4441	109.104
	139	99.7661	108.863
	140	100.196	108.575
	141	100.373	108.287
	142	100.209	108.274
	143	99.7154	108.653
	144	99.0915	109.111
	145	98.804	109.159
	146	98.883	108.904
	147	99.2124	108.662
	148	99.4035	108.645
	149	99.5385	108.819
	150	99.5688	109.127
	151	99.6141	109.245
	152	99.5921	109.265
	153	99.514	109.014
	154	99.2901	108.792
	155	99.1484	108.527
	156	99.1713	108.323
	157	99.239	108.026
	158	99.3292	107.761
	159	99.7558	107.52
	160	100.126	107.563
	161	100.474	107.657
	162	100.363	107.812
	163	100.139	107.622
	164	99.7056	107.288
	165	99.3732	106.939
	166	99.0708	106.884
	167	99.2133	106.932
	168	99.6101	106.947
	169	100.302	106.953
	170	100.534	107.127
	171	100.415	107.468
	172	100.045	107.67
	173	99.9037	107.527
	174	99.8144	106.908
	175	99.7775	106.61
	176	99.6919	106.612
	177	99.9017	106.958
	178	100.123	107.024
	179	100.231	106.778
	180	99.9553	106.145
	181	99.5295	105.703
	182	99.4028	105.462
	183	99.6276	105.486
	184	99.9458	105.31
	185	100.114	105.088
	186	100.193	104.926
	187	100.265	105.011
	188	100.306	105.236
	189	100.34	105.297
	190	100.218	105.066
	191	100.188	104.619
	192	100.188	104.466
	193	100.372	104.43
	194	100.384	104.427
	195	100.339	104.353
	196	100.186	104.35
	197	99.9849	104.407
	198	99.6601	104.501
	199	99.4137	104.386
	200	99.3842	104.042
	201	99.5267	103.731
	202	99.8038	103.597
	203	100.081	103.803
	204	100.276	103.846
	205	100.624	104.006
	206	100.871	104.1
	207	101.04	104.353
	208	100.625	104.401
	209	100.214	104.113
	210	99.7399	103.331
	211	99.5421	102.59
	212	99.3669	102.153
	213	99.4084	102.238
	214	99.6182	102.333
	215	100.168	102.455
	216	100.509	102.489
	217	100.517	102.602
	218	100.117	102.482
	219	99.5978	102.38
	220	99.5609	102.116
	221	99.894	102.164
	222	100.216	102.146
	223	100.138	102.31
	224	99.7233	102.293
	225	99.3611	102.303
	226	99.5859	102.258
	227	100.065	102.138
	228	100.69	101.733
	229	100.959	101.31
	230	101.027	101.022
	231	100.896	100.958
	232	100.837	101.174
	233	100.662	101.469
	234	100.629	101.806
	235	100.446	101.76
	236	100.267	101.775
	237	100.091	101.837
	238	100.073	102.029
	239	100.189	101.947
	240	100.276	101.724
	241	100.149	101.329
	242	99.9702	101.195
	243	99.9556	101.242
	244	100.005	101.523
	245	100.05	101.683
	246	99.8747	101.871
	247	99.8041	102.012
	248	99.5465	101.929
	249	99.689	101.688
	250	99.7904	101.47
	251	100.03	101.387
	252	99.9221	101.37
	253	99.844	101.142
	254	99.6724	100.803
	255	99.7252	100.454
	256	99.7406	100.129
	257	99.9316	99.9483
	258	99.9508	99.8935
	259	100.052	99.8714
	260	100	99.9005
	261	99.7277	99.6452
	262	99.4216	99.3852
	263	99.2463	99.2091
	264	99.5458	99.5041
	265	100.114	100.046
	266	100.519	100.546
	267	100.471	100.338
	268	100.112	99.9518
	269	99.5404	99.398
	270	99.3876	99.2639
	271	99.3468	99.1998
	272	99.8333	99.4155
	273	100.069	99.5332
	274	100.376	99.5251
	275	100.339	99.3257
	276	100.37	99.0191
	277	100.045	98.843
	278	99.9667	98.8488
	279	99.8175	98.9666
	280	100.095	98.7859
	281	100.357	98.4746
	282	100.895	98.3871
	283	101.288	98.6028
	284	101.547	98.7019
	285	101.327	98.6285
	286	100.912	98.6156
	287	100.318	98.8127
	288	100.064	98.8127
	289	99.9227	99.2242
	290	99.953	99.2242
	291	100.054	99.328
	292	100.376	99.328
	293	100.773	99.328
	294	101.136	99.054
	295	101.062	98.021
	296	100.733	98.4116
	297	100.255	98.021
	298	99.762	98.0175
	299	99.5381	98.3218
	300	99.8301	98.9759
	301
	302
	303
	304
	305
	306
	307
	308
	309
	310
	311
	312
	313
	314
	315
	316
	317
	318
	319
	320
	321
	322
	323
	324
	325
	326
	327
	328
	329
	330
	331
	332
	333
	334
	335
	336
	337
	338
	339
	340
	341
	342
	343
	344
	345
	346
	347
	348
	349
	350
	351
	352
	353
	354
	355
	356
	357
	358
	359
	360
	361
	362
	363
	364
	365
	366
	367
	368
	369
	370
	371
	372
	373
	374
	375
	376
	377
	378
	379
	380
	381
	382
	383
	384
	385
	386
	387
	388
	389
	390
	391
	392
	393
	394
	395
	396
	397
	398
	399
	400
	401
	402
	403
	404
	405
	406
	407
	408
	409
	410
	411
	412
	413
	414
	415
	416
	417
	418
	419
	420

## Sheet: Figure 5I
	Time(s)	+ ATc	- ATc
	0	98.0399	98.9327				+ ATc				- ATc
	1	98.2555	98.9327				4.529	4.977	4.364	3.2454	12.6503	13.9985	12.57
	2	98.3677	99.0921
	3	98.2469	99.2742
	4	97.3758	99.2287
	5	97.0135	98.9327
	6	97.3413	98.7961
	7	97.7639	98.8188
	8	98.4194	99.1148
	9	98.1175	99.7524
	10	97.9882	99.6385
	11	98.1348	99.1604
	12	97.9623	98.8188
	13	98.0917	98.8758
	14	98.6178	98.7733
	15	98.3332	98.8644
	16	97.945	98.853
	17	98.221	98.6822
	18	97.9105	98.6481
	19	97.9968	99.1831
	20	98.3418	98.8985
	21	98.4798	98.5798
	22	98.4022	98.3065
	23	98.083	98.2382
	24	98.0744	98.261
	25	98.7989	98.8075
	26	98.8076	98.5684
	27	98.8852	98.7733
	28	99.0491	98.8871
	29	98.1348	98.8188
	30	97.807	98.6367
	31	98.2814	98.8302
	32	98.4108	98.6367
	33	98.1779	98.853
	34	98.4712	99.3653
	35	98.2642	99.2628
	36	97.7639	99.0465
	37	97.8588	98.9668
	38	97.876	98.7961
	39	98.0227	98.6595
	40	98.4884	98.8871
	41	98.7472	98.8644
	42	98.4712	99.2515
	43	98.7817	99.3311
	44	98.6437	99.4564
	45	98.6351	99.3198
	46	98.8593	98.8075
	47	98.4712	98.6822
	48	98.4798	98.9896
	49	98.7299	98.8758
	50	98.8766	99.001
	51	98.7989	98.9327
	52	98.7731	98.6253
	53	98.6868	98.8644
	54	99.2992	98.9213
	55	99.2819	98.9668
	56	99.6011	99.1262
	57	99.6701	98.9782
	58	99.1526	99.2287
	59	99.489	99.3653
	60	99.8685	99.0921
	61	99.4803	99.0693
	62	99.8253	99.0921
	63	99.9202	98.7619
	64	99.3165	99.1945
	65	99.6615	99.2742
	66	99.696	99.445
	67	99.2388	99.5361
	68	99.1008	99.5816
	69	99.2819	99.2742
	70	99.2043	99.4222
	71	99.6615	99.5816
	72	99.5321	99.8662
	73	99.3165	99.9915
	74	99.1526	100.026
	75	99.5838	100.06
	76	99.7908	100.105
	77	99.8426	99.7296
	78	99.5321	99.6499
	79	99.3768	99.6385
	80	99.0318	99.7524
	81	98.7989	99.9801
	82	99.0577	100.094
	83	99.3251	99.7751
	84	100.007	99.7979
	85	100.446	99.5361
	86	99.972	99.8435
	87	99.4976	100.128
	88	99.6097	100.356
	89	99.7046	100.276
	90	99.9547	100.276
	91	99.9116	99.9232
	92	99.7046	100.185
	93	99.8081	100.561
	94	99.9461	100.413
	95	100.11	100.094
	96	100.136	99.8435
	97	99.9288	99.5702
	98	99.9892	99.6955
	99	100.11	100.196
	100	100.705	103.226
	101	101.141	104.4779*
	102	101.594	104.4071*
	103	101.88	103.667
	104	101.946	102.525
	105	101.922	101.99
	106	102.095	101.541
	107	102.519	101.266
	108	102.733	100.8247*
	109	102.704	101.077
	110	102.632	101.903
	111	102.59	102.951
	112	102.602	103.785
	113	102.173	104.281
	114	101.624	104.328
	115	101.26	104.124
	116	101.648	103.777
	117	102.411	103.344
	118	103.061	103.415
	119	103.05	104.021
	120	102.829	104.958
	121	102.376	105.627
	122	102.03	106.013
	123	101.684	106.36
	124	101.511	107.084
	125	101.528	107.934
	126	101.451	108.753
	127	101.493	108.729
	128	101.332	108.359
	129	101.66	107.903
	130	102.059	107.619
	131	102.799	107.328
	132	103.014	107.029
	133	102.978	106.722
	134	102.316	106.934
	135	102.024	107.328
	136	102.226	107.95
	137	103.145	108.391
	138	104.171	108.446
	139	104.529	108.296
	140	104.123	108.131
	141	102.745	108.202
	142	101.564	108.619
	143	101.212	109.186
	144	101.833	109.532
	145	102.62	109.572
	146	103.115	109.233
	147	102.93	109.218
	148	102.459	109.257
	149	102.286	109.407
	150	102.656	109.304
	151	103.616	109.17
	152	104.421	109.17
	153	104.905	109.627
	154	104.678	110.044
	155	103.98	110.406
	156	103.378	110.446
	157	103.097	110.257
	158	103.026	110.044
	159	102.966	110.084
	160	102.865	110.603
	161	102.984	111.328
	162	103.217	111.769
	163	103.354	111.627
	164	103.354	111.217
	165	103.389	110.776
	166	103.551	110.635
	167	103.574	110.32
	168	103.252	109.808
	169	102.71	109.414
	170	102.244	109.509
	171	102.376	110.107
	172	103.02	111.052
	173	103.7	111.737
	174	103.801	111.902
	175	103.306	111.564
	176	102.733	110.973
	177	102.507	110.611
	178	102.537	110.422
	179	103.044	110.383
	180	103.479	110.328
	181	104.225	110.084
	182	104.636	109.769
	183	104.732	109.777
	184	103.98	109.981
	185	103.169	110.438
	186	102.489	110.8
	187	102.572	111.131
	188	102.543	111.304
	189	102.853	111.304
	190	103.073	111.178
	191	103.676	110.887
	192	104.093	110.477
	193	103.998	110.359
	194	103.151	110.572
	195	102.149	111.123
	196	101.517	111.627
	197	101.594	111.855
	198	101.982	111.603
	199	102.477	111.17
	200	103.097	111.123
	201	103.604	111.698
	202	104.099	112.383
	203	104.046	112.65
	204	103.789	112.052
	205	103.545	111.469
	206	103.61	111.139
	207	103.575	111.375
	208	103.36	111.509
	209	102.823	111.351
	210	102.28	110.942
	211	101.868	110.643
	212	101.606	110.288
	213	101.648	110.344
	214	101.684	110.336
	215	101.928	110.65
	216	102.286	110.855
	217	102.65	111.186
	218	102.626	111.367
	219	102.393	111.556
	220	102.024	111.446
	221	101.892	111.154
	222	102.191	110.855
	223	102.531	110.847
	224	102.68	111.265
	225	102.065	111.713
	226	101.642	111.957
	227	101.397	111.58
	228	101.558	111.194
	229	101.678	110.682
	230	101.964	110.761
	231	102.024	110.84
	232	102.334	110.973
	233	102.411	110.769
	234	102.638	110.603
	235	102.596	110.674
	236	102.59	111.021
	237	102.352	111.052
	238	101.839	110.737
	239	101.063	110.548
	240	100.86	110.737
	241	101.23	111.383
	242	102.143	111.713
	243	102.882	111.367
	244	103.264	110.375
	245	103.085	109.414
	246	102.841	109.139
	247	102.632	109.399
	248	102.608	109.784
	249	102.393	109.903
	250	102.089	109.903
	251	101.588	109.855
	252	101.033	109.958
	253	100.634	109.981
	254	100.455	110.06
	255	100.485	110.036
	256	100.658	110.367
	257	100.741	110.761
	258	100.664	111.099
	259	100.831	111.005
	260	101.284	110.509
	261	101.976	109.745
	262	102.077	109.328
	263	101.791	109.446
	264	101.397	109.808
	265	101.397	109.879
	266	101.397	109.674
	267	101.403	109.973
	268	100.89	110.832
	269	100.407	112.162
	270	99.8703	112.713
	271	99.6734	112.312
	272	99.8702	111.422
	273	100.443	111.06
	274	101.045	110.91
	275	101.23	110.729
	276	101.159	110.123
	277	100.98	109.69
	278	101.29	109.627
	279	101.165	109.855
	280	100.992	110.249
	281	100.747	110.281
	282	101.218	110.084
	283	101.642	109.871
	284	101.791	109.784
	285	101.487	109.714
	286	101.075	109.816
	287	100.688	109.863
	288	100.491	109.989
	289	100.508	109.863
	290	100.819	109.682
	291	101.558	109.855
	292	102.131	110.091
	293	102.232	110.296
	294	101.66	110.265
	295	101.391	109.958
	296	101.499	109.596
	297	101.874	109.414
	298	102.077	109.399
	299	102.006	109.344
	300	101.648	109.281
	301
	302
	303
	304
	305
	306
	307
	308
	309
	310
	311
	312
	313
	314
	315
	316
	317
	318
	319
	320
	321
	322
	323
	324
	325
	326
	327
	328
	329
	330
	331
	332
	333
	334
	335
	336
	337
	338
	339
	340
	341
	342
	343
	344
	345
	346
	347
	348
	349
	350
	351
	352
	353
	354
	355
	356
	357
	358
	359
	360
	361
	362
	363
	364
	365
	366
	367
	368
	369
	370
	371
	372
	373
	374
	375
	376
	377
	378
	379
	380
	381
	382
	383
	384
	385
	386
	387
	388
	389
	390
	391
	392
	393
	394
	395
	396
	397
	398
	399
	400
	401
	402
	403
	404
	405
	406
	407
	408
	409
	410
	411
	412
	413
	414
	415
	416
	417
	418
	419
	420

## Sheet: Figure 5J
	Time(s)	+ ATc	- ATc
	0	99.0956	101.189			+ ATc				- ATc
	1	98.9556	101.201			7.8153	5.916	5.1359		13.7712	15.2682	12.2062
	2	99.024	100.92
	3	99.2519	100.498
	4	99.3626	100.255
	5	99.4538	100.401
	6	99.4668	100.726
	7	99.5775	100.961
	8	99.5189	100.924
	9	99.3496	100.722
	10	99.0793	100.502
	11	99.0923	100.356
	12	99.3235	100.326
	13	99.6817	100.285
	14	99.7761	100.281
	15	99.5222	100.371
	16	99.1835	100.517
	17	98.9784	100.647
	18	99.1445	100.7
	19	99.4245	100.636
	20	99.698	100.472
	21	99.7143	100.408
	22	99.6882	100.569
	23	99.6492	100.801
	24	99.6752	100.842
	25	99.6947	100.666
	26	99.6915	100.39
	27	99.6361	100.356
	28	99.6654	100.468
	29	99.6752	100.636
	30	99.6231	100.614
	31	99.444	100.632
	32	99.2389	100.692
	33	99.1705	100.846
	34	99.2258	100.823
	35	99.3431	100.733
	36	99.4342	100.528
	37	99.4277	100.404
	38	99.3333	100.322
	39	99.1868	100.259
	40	99.0012	100.143
	41	98.9165	99.9897
	42	98.9947	99.8888
	43	99.2226	99.844
	44	99.4863	99.9187
	45	99.6557	100.068
	46	99.7045	100.162
	47	99.6557	100.188
	48	99.6133	100.124
	49	99.4277	100.049
	50	99.3105	99.9411
	51	99.2096	99.9449
	52	99.2519	100.023
	53	99.2096	100.143
	54	99.2291	100.049
	55	99.2617	99.8813
	56	99.4766	99.5973
	57	99.7175	99.5562
	58	100.095	99.7057
	59	100.414	100.068
	60	100.779	100.281
	61	100.945	100.434
	62	100.785	100.386
	63	100.34	100.371
	64	99.8348	100.322
	65	99.4798	100.33
	66	99.4017	100.326
	67	99.4375	100.349
	68	99.5254	100.356
	69	99.5124	100.393
	70	99.4798	100.356
	71	99.4668	100.349
	72	99.584	100.36
	73	99.7924	100.371
	74	99.9878	100.33
	75	100.063	100.199
	76	99.978	99.9187
	77	99.8576	99.7543
	78	99.7371	99.6571
	79	99.6003	99.6721
	80	99.5156	99.6646
	81	99.5287	99.6982
	82	99.6231	99.7057
	83	99.7892	99.8103
	84	99.9162	99.9187
	85	100.014	100.072
	86	100.099	100.102
	87	100.007	100.012
	88	99.8966	99.8216
	89	99.685	99.6235
	90	99.6687	99.5076
	91	99.8836	99.6833
	92	100.099	99.9187
	93	100.092	100.038
	94	99.8966	99.9748
	95	99.6198	99.8202
	96	99.4896	99.8613
	97	99.5808	99.7002
	98	99.6996	99.6882
	99	99.9976	99.4017
	100	102.245	102.103
	101	102.758	102.943
	102	102.609	102.564
	103	102.238	102.529
	104	102.211	102.312
	105	102.677	103.506
	106	103.406	104.522
	107	104.089	105.391
	108	104.589	106.096
	109	104.825	107.205
	110	104.771	108.515
	111	104.845	109.949
	112	105.021	110.88
	113	105.217	111.306
	114	105.136	111.314
	115	104.677	111.229
	116	104.183	111.601
	117	103.846	112.322
	118	103.731	113.229
	119	103.656	113.966
	120	103.569	114.26
	121	103.569	113.989
	122	103.798	113.632
	123	104.177	113.175
	124	104.643	113.275
	125	104.859	113.601
	126	104.744	114.369
	127	104.271	114.904
	128	103.636	115.268
	129	102.94	115.082
	130	102.434	114.85
	131	102.211	114.493
	132	102.353	114.539
	133	102.67	114.749
	134	102.893	115.245
	135	102.832	115.284
	136	102.373	114.997
	137	101.968	114.384
	138	101.805	113.865
	139	101.866	113.741
	140	102.062	113.935
	141	102.346	114.206
	142	102.461	114.384
	143	102.332	114.532
	144	102.042	114.865
	145	101.738	115.198
	146	101.636	115.222
	147	101.515	115.02
	148	101.562	114.671
	149	101.582	114.563
	150	101.691	114.617
	151	101.799	114.842
	152	101.778	115.004
	153	101.535	115.098
	154	101.393	114.935
	155	101.36	114.47
	156	101.407	113.997
	157	101.515	113.818
	158	101.643	113.973
	159	101.9	114.043
	160	102.062	114.043
	161	102.109	113.888
	162	101.988	113.942
	163	101.832	114.237
	164	101.745	114.912
	165	101.853	115.508
	166	101.758	115.772
	167	101.657	115.385
	168	101.224	114.71
	169	100.9	114.222
	170	100.468	114.206
	171	100.434	114.431
	172	100.522	114.276
	173	100.772	114.02
	174	100.549	114.059
	175	100.198	114.648
	176	99.826	115.175
	177	99.9004	115.268
	178	100.312	114.873
	179	100.671	114.524
	180	100.596	114.159
	181	100.279	113.749
	182	99.9882	113.19
	183	99.8666	112.686
	184	100.049	112.368
	185	100.198	112.353
	186	100.245	112.384
	187	100.015	112.578
	188	99.5896	112.787
	189	99.468	113.151
	190	99.3734	113.082
	191	99.414	112.818
	192	99.2451	112.407
	193	98.8803	112.299
	194	98.6236	112.237
	195	98.8803	112.167
	196	99.3194	111.919
	197	99.7652	111.818
	198	99.6909	112.035
	199	99.2653	112.516
	200	98.8465	112.756
	201	98.7181	112.648
	202	98.9884	112.446
	203	99.2924	112.601
	204	99.3464	113.012
	205	99.3261	113.671
	206	99.2586	113.927
	207	99.2045	113.562
	208	99.1573	112.562
	209	99.1843	111.616
	210	99.3397	111.081
	211	99.5693	111.081
	212	99.495	111.283
	213	99.2653	111.244
	214	98.9141	110.996
	215	98.8127	110.709
	216	98.9343	110.826
	217	99.1167	110.996
	218	99.2451	111.26
	219	99.1302	111.159
	220	99.0965	110.864
	221	99.1167	110.353
	222	99.4613	110.252
	223	99.5761	110.477
	224	99.6572	110.895
	225	99.3599	111.027
	226	99.2181	110.872
	227	99.0627	110.585
	228	99.2248	110.647
	229	99.0154	110.965
	230	98.806	111.299
	231	98.6573	111.174
	232	98.9208	110.818
	233	99.2653	110.609
	234	99.3869	110.787
	235	99.2248	111.244
	236	98.9411	111.477
	237	98.7317	111.174
	238	98.9276	110.639
	239	99.1437	110.376
	240	99.3667	110.484
	241	99.2653	110.593
	242	99.0559	110.508
	243	98.8533	110.461
	244	98.8938	110.5
	245	99.1978	110.5
	246	99.5761	110.438
	247	99.6504	110.066
	248	99.4545	109.794
	249	99.0019	109.554
	250	98.5357	109.507
	251	98.4006	109.399
	252	98.4142	109.174
	253	98.7181	109.151
	254	99.0762	109.159
	255	99.2316	109.36
	256	99.2045	109.577
	257	98.7722	109.949
	258	98.3128	110.081
	259	97.8872	110.353
	260	97.8062	110.314
	261	97.9278	110.477
	262	98.3331	110.469
	263	98.5425	110.539
	264	98.9276	110.523
	265	99.0086	110.531
	266	99.0694	110.306
	267	98.9141	109.942
	268	98.9141	109.538
	269	98.8735	109.097
	270	98.9073	108.817
	271	98.7317	108.771
	272	98.5628	109.004
	273	98.2655	109.29
	274	98.0764	109.484
	275	98.0764	109.314
	276	98.2318	108.957
	277	98.6438	108.608
	278	98.9343	108.476
	279	99.0221	108.484
	280	98.7519	108.43
	281	98.6844	108.438
	282	98.6844	108.585
	283	98.9478	108.817
	284	99.0829	109.027
	285	99.1775	109.011
	286	99.0897	108.755
	287	99.0762	108.593
	288	98.887	108.585
	289	98.5493	108.709
	290	98.0223	108.872
	291	97.7791	108.903
	292	97.8872	108.74
	293	98.0021	108.755
	294	98.0088	108.786
	295	97.8602	108.949
	296	97.7454	108.942
	297	97.9278	108.895
	298	98.4547	108.631
	299	98.9613	108.531
	300	99.164	108.693
	301	98.8397	109.221
	302	98.5628	109.507
	303	98.3871	109.407
	304	98.4885	108.678
	305	98.5493	107.833
	306	98.4614	107.453
	307	98.0831	107.724
	308	97.867	108.406
	309	97.9007	108.98
	310	97.9953	109.422
	311	98.1912	109.531
	312	97.8264	109.67
	313	97.948	109.763
	314	98.1304	109.926
	315	97.948	109.089
	316	97.9278	108.368
	317	98.4344	107.461
	318	98.2115	107.623
	319	98.7384	107.856
	320	98.8803	108.856
	321	98.6776	109.531
	322	98.3331	109.042
	323	98.0088	108.717
	324	97.7859	109.67
	325	98.3939	109.996
	326	98.9613	110.159
	327	98.7992	109.275
	328	98.9411	107.786
	329	98.2723	107.368
	330	97.9075	108.438
	331	98.3331	109.6
	332	98.7789	109.577
	333	98.5965	108.833
	334	98.4142	108.205
	335	98.0696	107.647
	336	98.0899	106.972
	337	98.0291	107.484
	338	98.252	107.6
	339	98.3534	108.275
	340	98.0696	109.135
	341	97.948	109.856
	342	98.6979	109.089
	343	98.7181	108.972
	344	98.9411	108.321
	345	98.6371	107.74
	346	98.1507	107.74
	347	97.6238	107.903
	348	97.6846	107.414
	349	98.1102	108.205
	350	98.9411	108.67
	351	99.3059	108.647
	352	99.3059	108.717
	353	99.1437	108.531
	354	98.4344	108.019
	355	98.7181	108.414
	356	99.2451	108.391
	357	98.9208	108.205
	358	98.6168	107.996
	359	97.9886	107.949
	360	97.3805	108.577
	361	97.3603	109.81
	362	97.5224	109.787
	363	97.9278	109.438
	364	98.4952	108.321
	365	98.2926	107.088
	366	98.7181	106.809
	367	98.3736	107.507
	368	98.3939	108.019
	369	99.0019	108.414
	370	99.0627	108.6
	371	98.6168	108.368
	372	98.7384	108.065
	373	97.9278	108.042
	374	97.5427	107.972
	375	98.0696	107.507
	376	98.2318	107.67
	377	98.7789	108.158
	378	99.3869	108.763
	379	98.9208	109.019
	380	98.171	109.019
	381	97.8467	108.368
	382	97.3197	108.298
	383	97.6035	109.042
	384	97.867	108.856
	385	98.2926	108.321
	386	98.5357	108.135
	387	98.4344	107.507
	388	98.2115	108.135
	389	98.1507	109.856
	390	98.2723	110.787
	391	98.6979	110.159
	392	99.0424	109.81
	393	98.8195	108.414
	394	98.7181	108.321
	395	98.9005	108.275
	396	99.0627	107.67
	397	99.1437	106.46
	398	99.5491	106.926
	399	99.164	107.065
	400	98.9208	108.135
	401	98.3939	108.368
	402	98.0696	108.089
	403	97.9278	107.437
	404	98.5965	107.484
	405	99.0829	107.321
	406	98.475	107.158
	407	98.0088	108.135
	408	98.2115	108.67
	409	98.5965	108.344
	410	99.0019	108.065
	411	99.0829	107.507
	412	98.0494	107.833
	413	97.5022	109.74
	414	97.1982	0
	415	97.7454	0
	416	98.7587	0
	417	98.7181	0
	418	98.9411	0
	419	98.4952	0
	420	98.1304	0
		98.3331	0
		98.8803	0
		98.252	0
		98.3331	0
		98.475	0
		98.86	0
		98.7992	0
		98.7384	0
		98.2115	0
		98.3331	0
		99.2045	0
		99.9341	0
		99.8936	0
		98.5155	0
		0	0
		0	0
		0	0
		0	0
		0	0
			0
			0
			0
			0
			0
			0
			0
			0
			0
			0
			0
			0
			0
			0
			0
			0
			0
			0
			0
			0
			0
			0
			0
			0
			0
			0
			0
			0
			0
			0
			0
			0
			0
			0
			0
			0
			0
			0
			0
			0
			0
			0
			0
			0

## Sheet: Figure 5K
	Time(s)	+ ATc	- ATc
	0	99.8614	98.1874				+ ATc				- ATc
	1	99.9347	98.1486				3.3023	4.1513	4.8411		17.1615	15.4974	15.9283
	2	99.8646	98.1796
	3	99.7372	98.2803
	4	99.5588	98.4275
	5	99.4791	98.4933
	6	99.511	98.5824
	7	99.5843	98.5747
	8	99.5938	98.5127
	9	99.6098	98.3268
	10	99.5556	98.168
	11	99.6416	98.1603
	12	99.8646	98.3655
	13	99.9729	98.6947
	14	99.9697	98.869
	15	99.8519	98.7722
	16	99.8646	98.656
	17	99.9888	98.718
	18	100.062	98.9078
	19	100.097	99.0201
	20	99.9825	98.8884
	21	99.9825	98.5902
	22	100.084	98.2455
	23	100.17	98.0479
	24	100.014	98.0053
	25	99.8455	98.0324
	26	99.597	97.9085
	27	99.6384	97.8233
	28	99.6448	97.7187
	29	99.7531	97.9046
	30	99.7563	98.2338
	31	99.7372	98.6057
	32	99.7563	98.6831
	33	99.8073	98.4933
	34	99.9283	98.2145
	35	100.062	98.1254
	36	100.18	98.1215
	37	100.161	98.1835
	38	100.132	98.1874
	39	99.9952	98.1525
	40	99.9825	98.1525
	41	99.9124	98.1796
	42	99.9092	98.1293
	43	99.9124	98.0789
	44	99.9984	98.0518
	45	100.148	98.1757
	46	100.317	98.443
	47	100.304	98.7645
	48	100.135	98.9697
	49	99.8933	98.9078
	50	99.7213	98.687
	51	99.7372	98.5243
	52	99.7722	98.6134
	53	99.7882	99.0046
	54	99.82	99.4268
	55	99.9219	99.6553
	56	100.103	99.5662
	57	100.1	99.388
	58	100.056	99.1479
	59	99.9347	99.0511
	60	100.062	99.0588
	61	100.139	99.1828
	62	100.218	99.2641
	63	99.957	99.2254
	64	99.7276	99.0666
	65	99.5014	98.8148
	66	99.5906	98.7064
	67	99.7149	98.8303
	68	99.9474	99.1789
	69	99.9984	99.419
	70	99.8933	99.5159
	71	99.6575	99.4849
	72	99.5779	99.4965
	73	99.6607	99.6475
	74	99.8391	99.7521
	75	99.7595	99.725
	76	99.6289	99.5739
	77	99.5174	99.6049
	78	99.6958	99.7482
	79	99.8328	99.8528
	80	99.9442	99.6592
	81	99.7659	99.4151
	82	99.7627	99.2602
	83	99.8136	99.2757
	84	99.9697	99.4268
	85	99.8805	99.4771
	86	99.7754	99.5352
	87	99.6193	99.6088
	88	99.7117	99.7831
	89	99.785	99.9613
	90	100.053	100.058
	91	100.164	100.07
	92	100.189	100.054
	93	100.069	99.9806
	94	99.9188	100
	95	99.7913	99.9845
	96	99.7977	99.9303
	97	99.8073	99.8218
	98	99.871	99.7153
	99	99.8232	99.7327
	100	100.249	100.145
	101	101.225	100.395
	102	101.981	101.315
	103	102.811	103.091
	104	103.242	105.874
	105	103.547	108.747
	106	103.654	111.111
	107	103.753	112.588
	108	103.554	113.508
	109	103.189	114.25
	110	102.904	114.597
	111	102.724	114.782
	112	102.665	114.726
	113	102.632	114.839
	114	102.539	115.008
	115	102.525	115.162
	116	102.671	115.049
	117	103.109	114.992
	118	103.561	114.839
	119	103.992	114.976
	120	104.151	115.267
	121	104.072	115.517
	122	103.587	115.581
	123	103.063	115.622
	124	102.87	115.686
	125	102.983	115.791
	126	103.302	115.807
	127	103.382	115.702
	128	103.528	115.686
	129	103.514	115.646
	130	103.567	115.759
	131	103.222	115.799
	132	102.691	115.493
	133	102.107	115.307
	134	101.941	115.372
	135	102.047	115.662
	136	102.174	115.928
	137	102.207	115.856
	138	101.994	115.436
	139	101.842	114.855
	140	101.722	114.387
	141	101.709	114.298
	142	101.576	114.202
	143	101.477	114.032
	144	101.576	114.024
	145	101.862	113.96
	146	102.067	114.056
	147	102.14	114.169
	148	101.882	114.29
	149	101.424	114.121
	150	101.218	113.709
	151	101.205	113.387
	152	101.191	113.354
	153	101.205	113.588
	154	101.205	113.701
	155	101.132	113.725
	156	100.78	113.338
	157	100.495	113.096
	158	100.255	112.902
	159	100.348	112.991
	160	100.78	112.806
	161	101.39	112.733
	162	101.789	112.386
	163	101.882	112.41
	164	101.696	112.354
	165	101.145	112.685
	166	100.594	112.854
	167	100.242	112.636
	168	100.634	111.789
	169	101.118	111.159
	170	101.775	110.95
	171	101.782	111.402
	172	101.45	111.708
	173	100.667	111.886
	174	100.07	111.749
	175	99.5122	111.724
	176	99.26	111.805
	177	99.0476	111.918
	178	98.9348	111.773
	179	98.895	111.708
	180	98.8286	111.62
	181	98.8684	111.595
	182	98.9945	111.313
	183	99.0742	110.99
	184	98.968	110.805
	185	98.656	110.829
	186	98.4437	110.966
	187	98.5698	111.079
	188	98.8684	111.127
	189	99.187	111.071
	190	99.1206	110.917
	191	99.0609	110.627
	192	99.2799	110.466
	193	99.864	110.538
	194	100.109	110.869
	195	99.7909	111.135
	196	99.0078	111.103
	197	98.7091	110.611
	198	98.6826	110.103
	199	98.9414	110.078
	200	98.749	110.506
	201	98.4238	110.877
	202	98.1915	110.877
	203	98.2114	110.498
	204	98.1649	110.385
	205	98.0919	110.627
	206	97.9526	111.063
	207	97.926	111.232
	208	97.9459	111.038
	209	97.8995	110.813
	210	97.9791	110.619
	211	98.0322	110.441
	212	98.0919	110.038
	213	97.8663	109.828
	214	97.6141	109.489
	215	97.3884	109.392
	216	97.4813	108.916
	217	97.5411	108.731
	218	97.488	108.602
	219	97.2557	108.957
	220	96.9238	109.118
	221	96.6716	109.207
	222	96.5256	109.094
	223	96.4062	109.191
	224	96.5389	109.376
	225	96.9238	109.699
	226	97.6141	109.844
	227	98.1317	109.836
	228	98.2777	109.659
	229	97.8132	109.465
	230	97.3154	109.489
	231	96.957	109.828
	232	96.9305	110.24
	233	96.9637	110.466
	234	97.0898	110.401
	235	97.2026	110.054
	236	97.3154	109.748
	237	97.1628	109.287
	238	96.884	108.836
	239	96.6252	108.529
	240	96.6451	108.634
	241	96.9371	109.094
	242	97.2955	109.651
	243	97.2358	109.877
	244	97.2889	109.707
	245	97.1495	109.207
	246	97.1495	108.4
	247	96.9437	107.835
	248	96.6318	107.674
	249	96.2734	108.206
	250	96.1473	109.037
	251	96.1208	109.731
	252	96.2867	109.844
	253	96.3398	109.417
	254	96.3133	108.755
	255	96.4062	108.109
	256	96.6318	107.658
	257	97.1097	107.367
	258	97.4747	107.399
	259	97.4481	107.383
	260	97.2358	107.496
	261	96.9637	107.52
	262	96.957	107.94
	263	97.123	108.4
	264	97.1893	108.844
	265	96.9106	108.86
	266	96.4593	108.594
	267	95.9615	108.206
	268	95.9217	107.94
	269	96.1805	107.916
	270	96.6849	107.956
	271	96.8243	108.206
	272	96.5854	108.529
	273	96.227	108.941
	274	96.2071	109.086
	275	96.3663	108.844
	276	96.6252	108.537
	277	96.7115	108.231
	278	96.7446	108.069
	279	96.6982	107.883
	280	96.519	107.77
	281	96.2535	107.746
	282	95.9283	108.061
	283	95.915	108.424
	284	96.0876	108.779
	285	96.1672	108.868
	286	96.0743	108.803
	287	95.9416	108.602
	288	95.935	108.408
	289	96.1739	108.198
	290	96.5787	108.077
	291	96.8774	107.932
	292	96.811	107.924
	293	96.4261	107.803
	294	95.8619	107.875
	295	95.3775	107.795
	296	94.9726	107.754
	297	94.8001	107.52
	298	94.5877	107.383
	299	94.6939	107.537
	300	95.2713	107.94
	301	96.2336	108.343
	302	96.8508	108.4
	303	96.7977	108.134
	304	96.9836	108.134
	305	96.0876	107.819
	306	94.8532	107.819
	307	94.2558	108.594
	308	94.5545	109.174
	309	95.2912	109.296
	310	95.8288	108.594
	311	96.1473	107.843
	312	95.9084	107.601
	313	95.8288	107.674
	314	95.3907	107.77
	315	95.2713	107.988
	316	96.1672	108.109
	317	95.8089	107.722
	318	95.6297	107.407
	319	95.9681	107.432
	320	95.4903	107.335
	321	95.3907	107.601
	322	95.9681	108.013
	323	95.6297	107.843
	324	95.6098	107.795
	325	95.8885	107.48
	326	95.5102	107.044
	327	96.0876	106.778
	328	96.0876	106.1
	329	96.5655	105.785
	330	96.4858	106.076
	331	95.8686	106.705
	332	95.1518	107.916
	333	95.1717	108.303
	334	94.9925	108.642
	335	94.8731	108.206
	336	94.4549	107.553
	337	94.0567	107.528
	338	94.1762	108.158
	339	94.3753	107.432
	340	95.112	107.238
	341	95.2713	106.584
	342	94.893	106.149
	343	95.0124	106.73
	344	94.9925	107.625
	345	94.9726	107.407
	346	95.5699	107.02
	347	95.5699	107.214
	348	94.9726	106.948
	349	94.674	107.335
	350	94.0368	107.698
	351	94.5943	108.158
	352	95.4107	107.528
	353	95.4306	107.916
	354	95.3907	108.037
	355	94.5943	108.376
	356	94.3554	108.182
	357	94.9328	107.722
	358	94.9527	106.487
	359	95.0523	106.512
	360	94.674	106.754
	361	93.5988	107.432
	362	93.9174	107.504
	363	94.1165	107.335
	364	94.435	107.48
	365	95.0722	107.819
	366	95.3708	107.674
	367	95.1717	107.553
	368	95.5301	106.996
	369	95.6695	107.504
	370	95.5898	107.722
	371	95.769	107.504
	372	95.2315	107.48
	373	95.0921	107.165
	374	94.9925	106.536
	375	94.5147	106.512
	376	94.6142	106.197
	377	95.4903	106.342
	378	94.674	106.657
	379	95.4704	106.705
	380	95.5102	106.487
	381	94.9328	106.705
	382	94.7337	107.141
	383	95.1518	107.432
	384	94.6342	107.286
	385	94.893	107.141
	386	95.1717	106.536
	387	95.2912	107.093
	388	94.8532	107.746
	389	94.7337	107.577
	390	94.5346	107.383
	391	94.4749	107.335
	392	94.4151	106.318
	393	94.7138	106.463
	394	94.6541	106.802
	395	94.1762	107.528
	396	94.5545	107.504
	397	95.3708	107.77
	398	94.9925	107.093
	399	95.112	106.754
	400	94.7735	106.294
	401	93.778	106.487
	402	93.2603	106.826
	403	93.4395	107.189
	404	93.0413	0
	405	93.9174	0
	406	94.6342	0
	407	95.5102	0
	408	95.8686	0
	409	95.7889	0
	410	94.8731	0
	411	94.2758	0
	412	93.6187	0
	413	94.0767	0
	414	93.9771	0
	415	93.7183	0
	416	93.8975	0
	417	93.997	0
	418	94.0567	0
	419	94.9328	0
	420	94.8333	0
		94.6342	0
