# Supplementary figures and images for: Calcium transfer from the ER to other organelles for optimal signaling in Toxoplasma gondii
Source: eLife journal article supplement (doi:10.7554/elife.101894), 2024-12-09

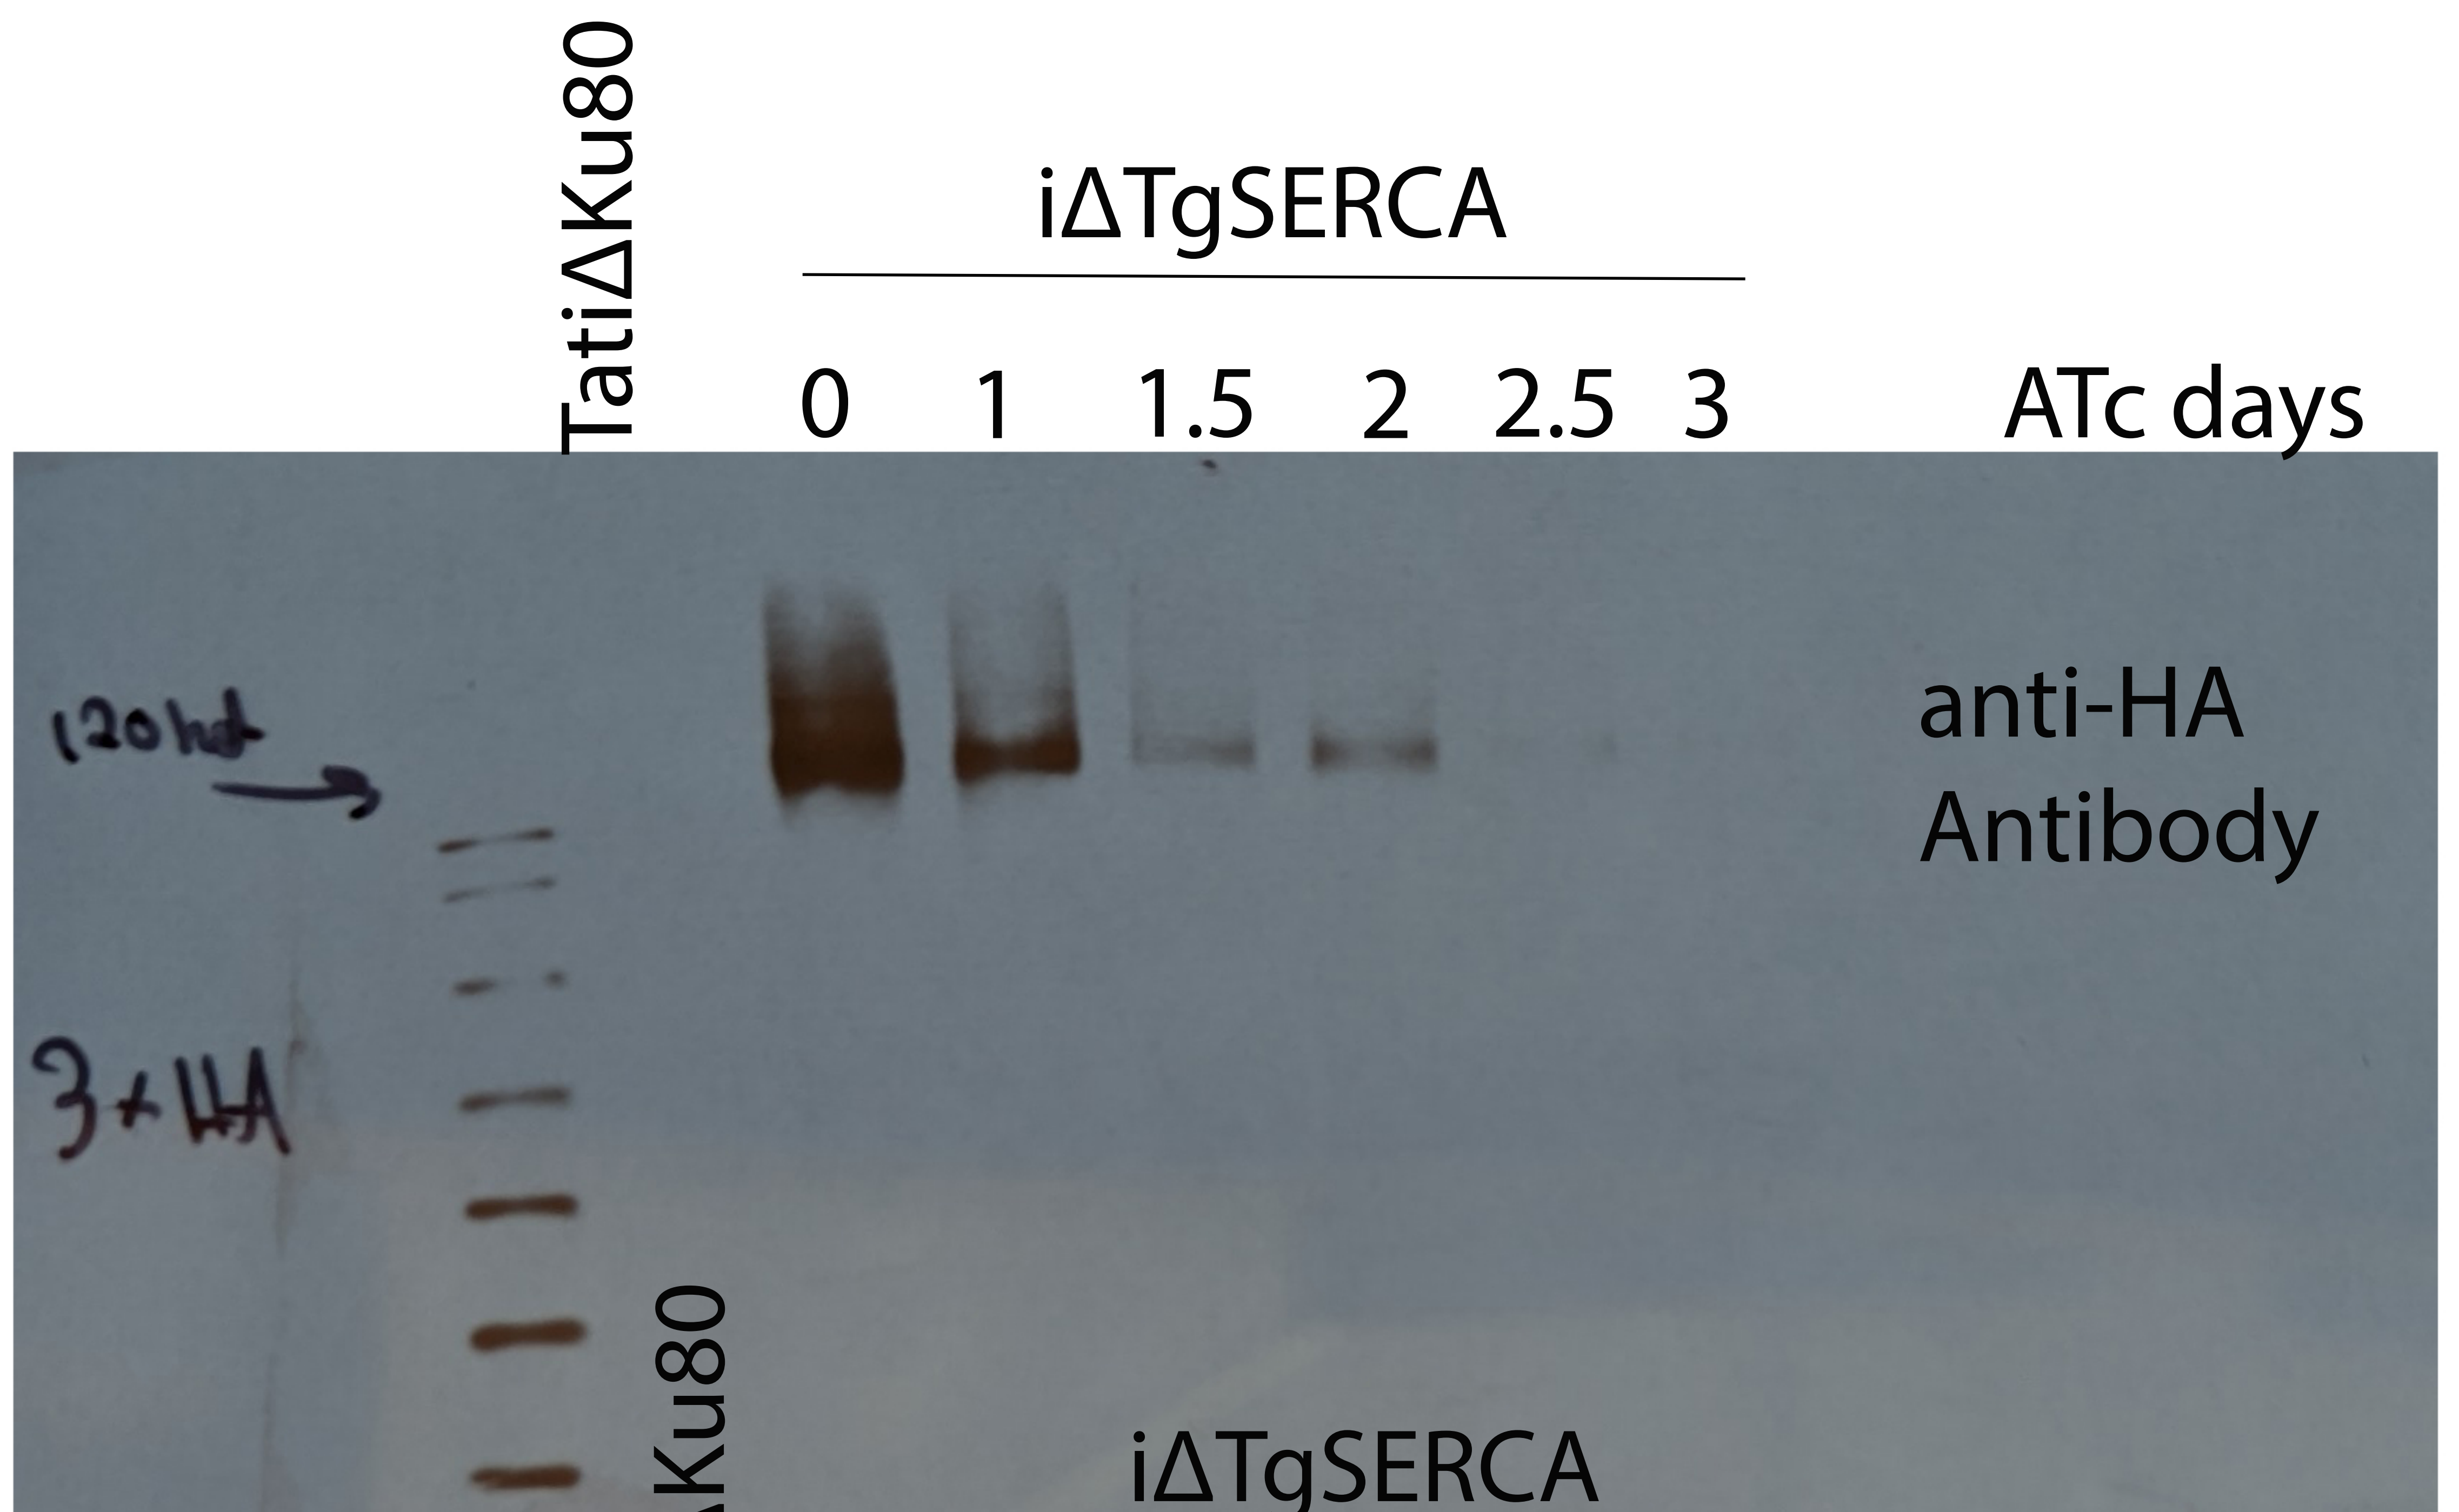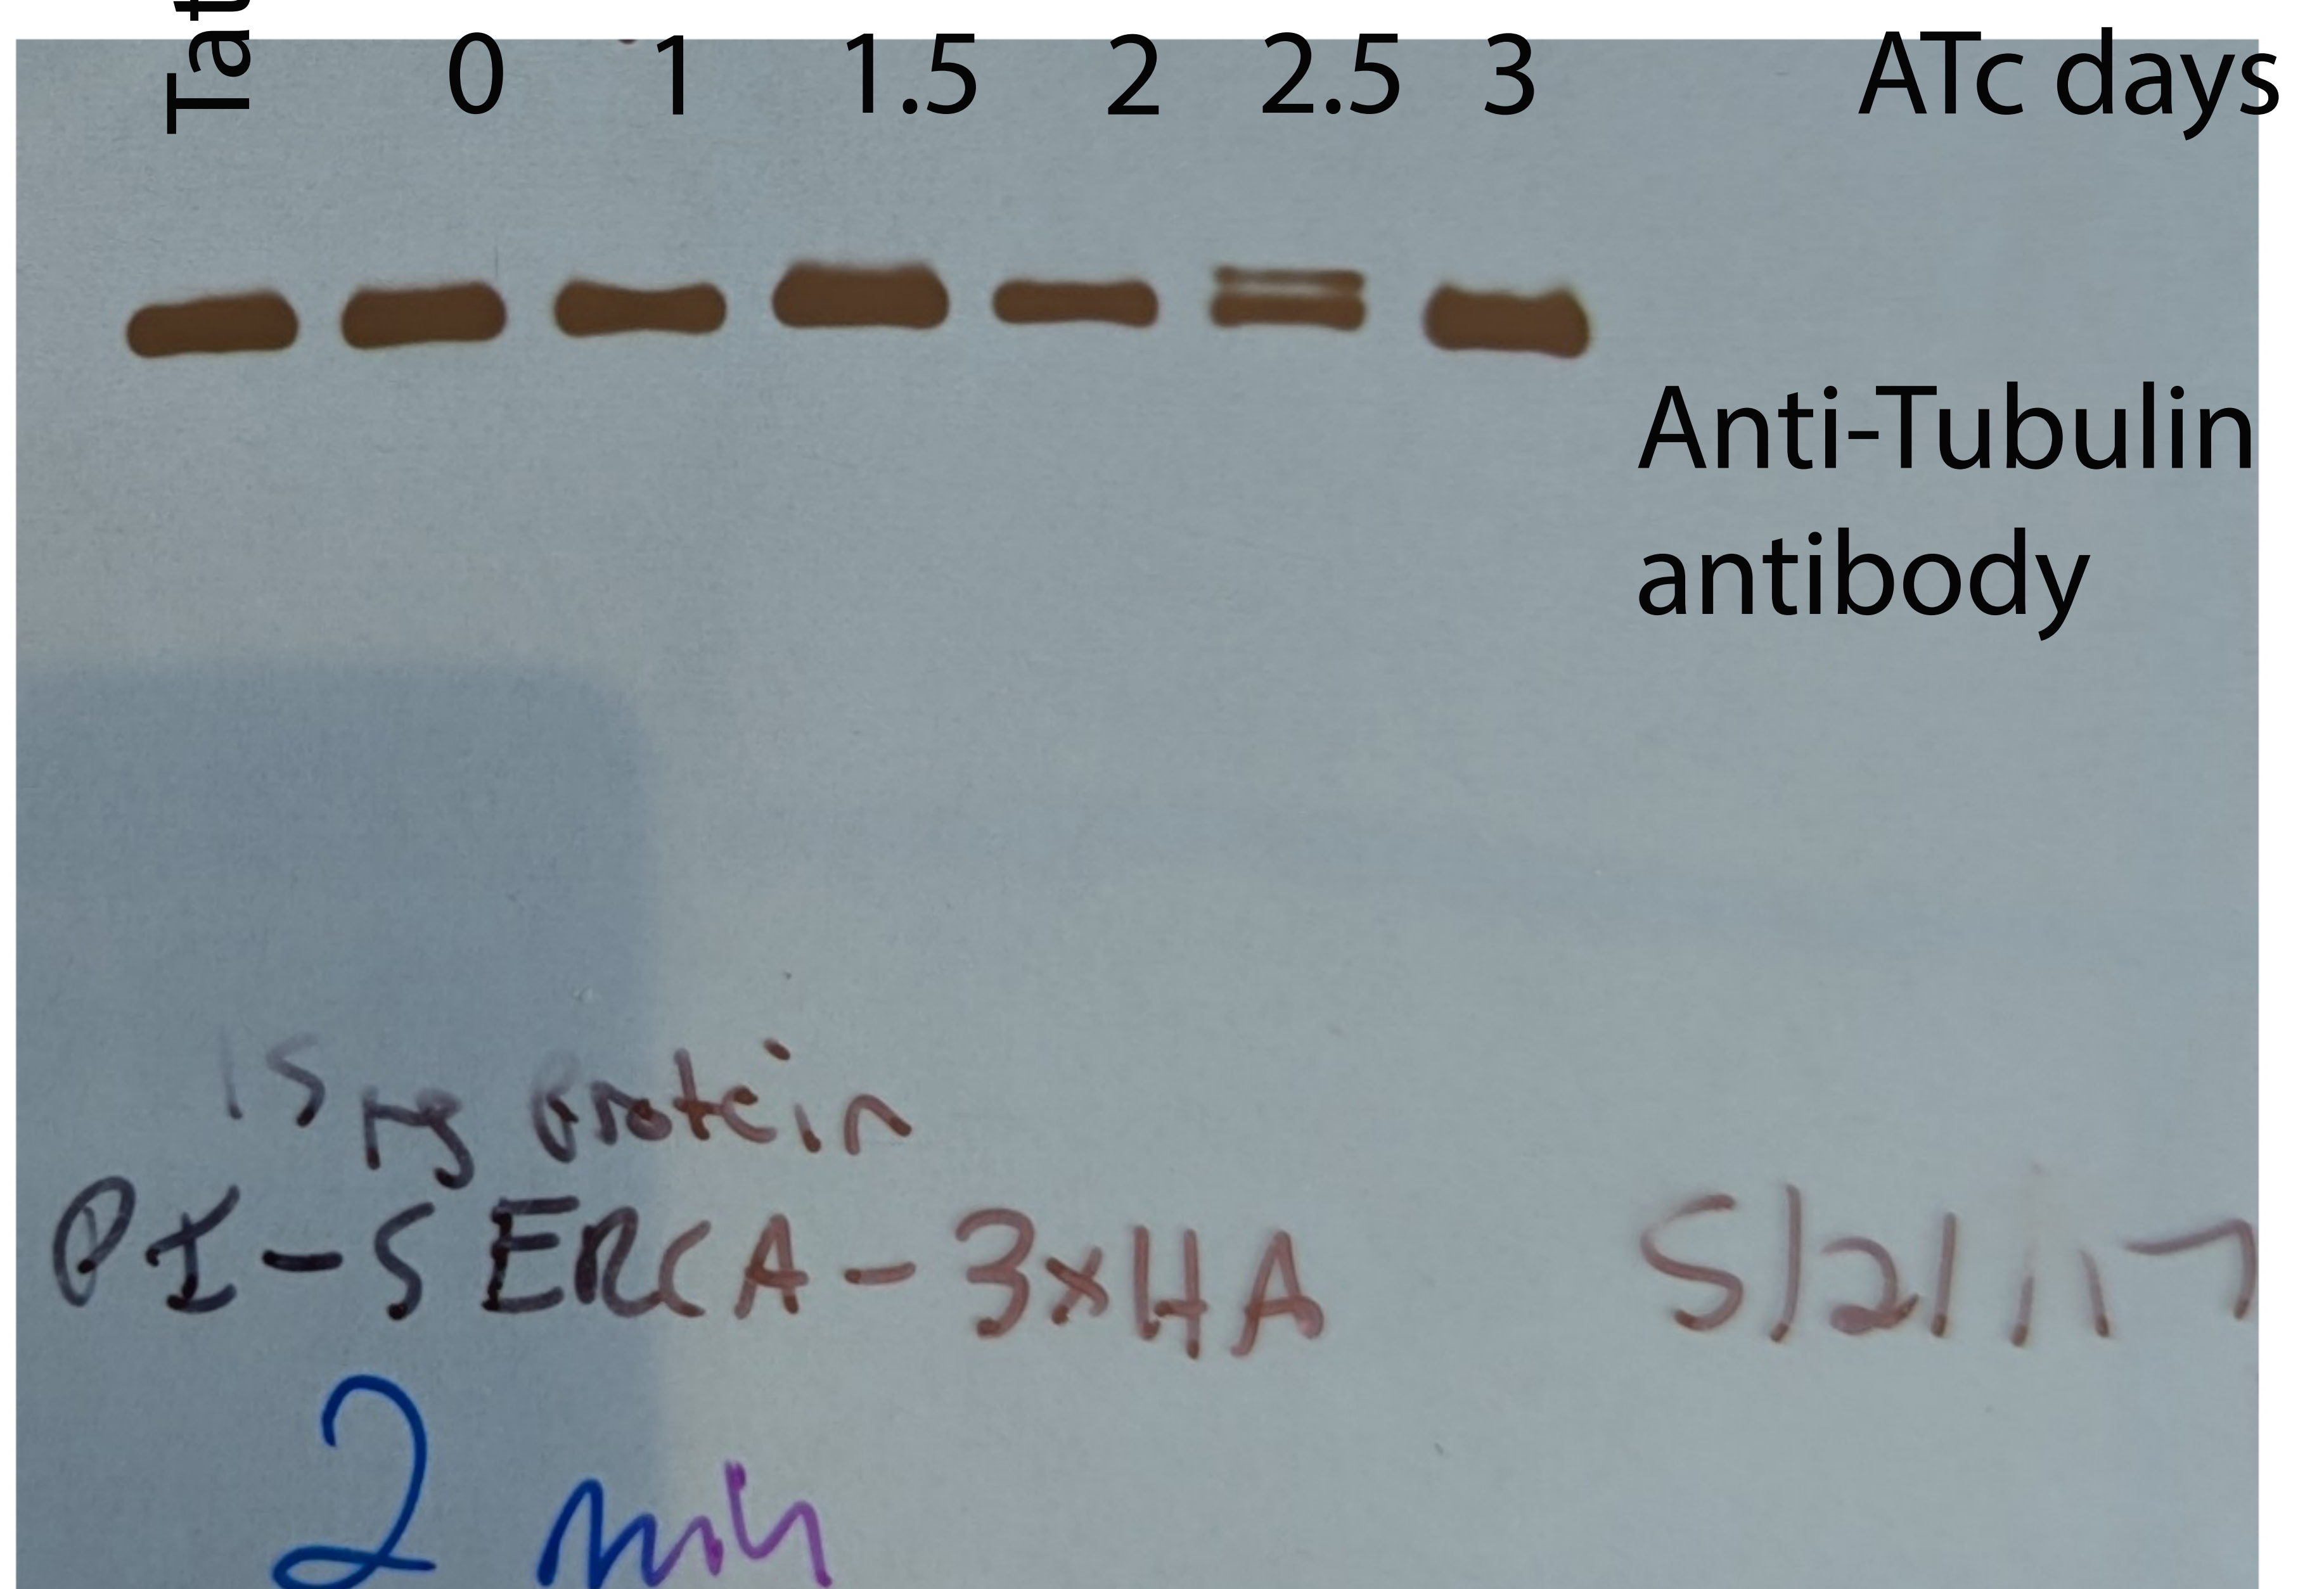

Supplement: fig3-data3 [file Figure 3-source data 3.pdf › Figure 3-source data 3.pdf]

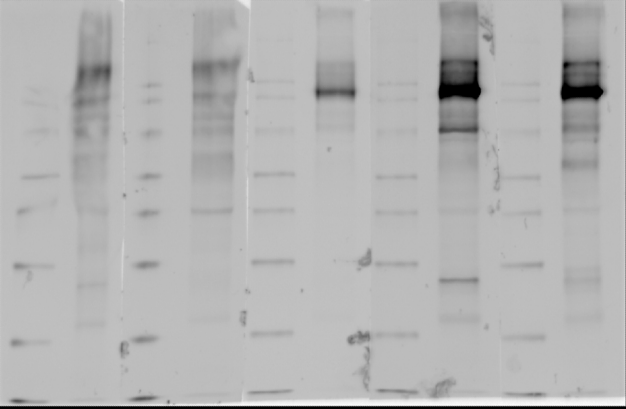

Marker

Sibley lab

anti-TgSERCAs

Marker

Guinea pig 2

anti-TgSERCAs

Supplement: fig3-figsupp1-data2 [file Figure 3-figure supplement 1-Source data 2.pdf › Figure 3-figure supplement 1-Source data 2.pdf]
